# Supplementary material for: Enantioselective trapping of phosphoramidate ammonium ylides with imino esters for synthesis of 2,3-diaminosuccinic acid derivatives
Source: Royal Society of Chemistry journal article supplement (doi:10.1039/c3cc36972b), 2013-01-01
Supplement: c3cc36972b.pdf [file c3cc36972b.pdf]

# Enantioselective Trapping of Phosphoramidate Ammonium Ylides with Imino Esters for Synthesis of 2, 3-Diaminosuccinic Acid Derivatives

Jun Jiang, Xiaochu Ma, Shunying Liu, Yu Qian, Fengping Lv, Lin Qiu, Xiang Wu and Wenhao Hu\*

*Shanghai Engineering Research Center of Molecular Therapeutics and New Drug Development, East China Normal University, 3663 North Zhongshan Rd., Shanghai, China, 200062*

E-mail: [whu@chem.ecnu.edu.cn](mailto:whu@chem.ecnu.edu.cn)

## Contents:

|                                                                                                   |      |
|---------------------------------------------------------------------------------------------------|------|
| General remarks and materials.....                                                                | S-2  |
| General procedure for optimization of reaction conditions.....                                    | S-2  |
| References.....                                                                                   | S-3  |
| <sup>1</sup> H NMR, <sup>13</sup> C NMR, <sup>31</sup> P NMR and HPLC data for new compounds..... | S-3  |
| X-ray diffraction parameters and data of <i>syn</i> 4i.....                                       | S-9  |
| <sup>1</sup> H NMR and <sup>13</sup> C NMR spectra for new compounds.....                         | S-11 |
| Representative <sup>31</sup> P NMR spectra for new compounds.....                                 | S-25 |
| HPLC spectra for new compounds.....                                                               | S-30 |

### General Remarks and Materials:

All reactions and manipulations were carried out under an argon atmosphere, in a flame-dried or oven-dried flask containing magnetic stir bar. All  $^1\text{H}$  NMR, and  $^{13}\text{C}$  NMR spectra were recorded using a Bruker 400 MHz or 500 MHz spectrometer in  $\text{CDCl}_3$ . Tetramethylsilane (TMS) served as an internal standard ( $\delta = 0$ ) for  $^1\text{H}$  NMR, and  $\text{CDCl}_3$  was used as internal standard ( $\delta = 77.0$ ) for  $^{13}\text{C}$  NMR. 85%  $\text{H}_3\text{PO}_4$  was used as external standard for  $^{31}\text{P}$  NMR. Chemical shifts are reported in parts per million as follows: chemical shift, multiplicity (s = singlet, d = doublet, t = triplet, q = quartet, m = multiplet, br = broad). HRMS (ESI) Mass spectra were recorded on IonSpec FT-ICR mass spectrometer. HPLC analysis was performed on Dalian Elite (UV230+ UV/Vis Detector and P230P High Pressure Pump). Chiralpak AD-H, IA was purchased from Daicel Chemical Industries, LTD. The racemic standards used in HPLC studies were prepared according to the general procedure by using racemic BINOL derived phosphoric acid catalysts. Dichloromethane (DCM), 1,2-dichloroethane (DCE) and toluene was distilled over calcium hydride. Glyoxylate derived imines were prepared from condensation of the corresponding aldehydes with amines according to the literature method.<sup>[1]</sup> Chiral phosphoric acids (PPAs) **5a-g** were prepared according to the literature procedure.<sup>[2]</sup>

### General Procedure for Optimization of Reaction Conditions (Table 1):

**Running the reaction at room temperature:** A mixture of  $\text{Rh}_2(\text{OAc})_4$  (0.004 mmol, 1.7mg), phosphoramidate **2** (0.26 mmol), imine **3a** (0.2 mmol), PPAs (as indicated in table 1), and 4Å MS (0.1 g) in 5.6 mL under an argon atmosphere was stirred under the indicated temperature in table 1. Diazo compound **1a** (0.26 mmol) in 2.8 mL toluene was then added over 1 h via a syringe pump at room temperature. After completion of the addition, the reaction mixture was filtrated and the filtrate evaporated *in vacuo* to give the crude product. And then the crude product was purified by flash chromatography on silica gel (EtOAc/light petroleum ether = 1:20 ~ 1:5) to give the pure product.

### General Procedure for the Enantioselective Three-Component Reactions (Table 2):

A mixture of  $\text{Rh}_2(\text{OAc})_4$  (0.004 mmol, 1.7mg), chiral phosphoric acid **5f** (2.5 mmol%), phosphoramidate **2** (0.26 mmol), imine **3** (0.2 mmol) and 4Å MS (0.1 g) in 5.6 mL of toluene under an argon atmosphere was stirred under rt. Diazo compound **1** (0.26 mmol) in 2.8 ml of toluene was then added over 1 h via a syringe pump. After completion of the addition, the reaction mixture was filtrated and evaporated *in vacuo* to give the crude product. The crude product was purified by flash chromatography on silica gel (eluent: EtOAc/light petroleum ether = 1:20 ~ 1:5) to give the pure product.

## References:

- [1] M. Mauksch; S. B. Tsogoeva; I. M. Martynova; S. Wei, *Angew. Chem.* 2007, **119**, 397; *Angew. Chem. Int. Ed.* 2007, **46**, 393.  
[2] (a) D. Uraguchi; M. Terada; *J. Am. Chem. Soc.* 2004, **126**, 5356. (b) T. Akiyama; H. Morita; J. Itoh; K. Fuchibe; *Org. Lett.* 2005, **7**, 2583. (c) R. I. Storer; D. E. Carrera; Y. Ni; D. W. C. MacMillan; *J. Am. Chem. Soc.* 2006, **128**, 84. (d) M. Yamanaka; J. Itoh; K. Fuchibe; T. Akiyama *J. Am. Chem. Soc.* 2007, **129**, 6756. (e) J. Jiang; J. Yu; X.-X. Sun; Q.-Q. Rao; L.-Z. Gong; *Angew. Chem. Int. Ed.* 2008, **47**, 2458.

## <sup>1</sup>H NMR, <sup>13</sup>C NMR data, <sup>31</sup>P NMR and HPLC data of compounds:

### (2*R*,3*R*)-4-ethyl 1-methyl 2-((diphenoxyphosphoryl)amino)-3-((4-methoxyphenyl)amino)-2-phenylsuccinate (4a).

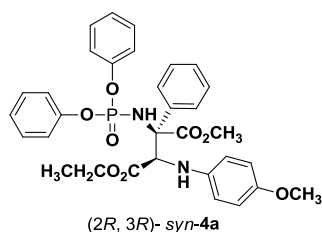

(2*R*,3*R*)-*syn*-4a: 85% ee; <sup>1</sup>H NMR (400MHz, CDCl<sub>3</sub>): 7.17-7.37 (m, 14H), 6.89 (d, *J* = 8.4 Hz, 2H), 6.75 (d, *J* = 8.8 Hz, 2H), 6.68 (d, *J* = 8.8 Hz, 2H), 5.39 (d, *J* = 10.4 Hz, 1H), 5.18 (d, *J* = 8.4 Hz, 1H), 4.61 (d, *J* = 10.4 Hz, 1H), 3.98-4.02 (m, 1H), 3.86-3.86 (m, 4H), 3.74 (s, 3H), 1.02(t, *J* = 7.2 Hz,

3H); <sup>13</sup>C NMR (100 MHz, CDCl<sub>3</sub>): δ 13.85, 53.71, 55.69, 61.39, 62.41, 67.31, 67.35, 114.77, 115.50, 120.27, 120.31, 120.40, 120.45, 124.83, 125.00, 127.64, 128.28, 128.53, 129.46, 129.60, 136.47, 139.87, 150.69 (d, *J*<sub>CP</sub> = 12.8 Hz), 150.79 (d, *J*<sub>CP</sub> = 11.3 Hz), 171.81; <sup>31</sup>P (162 MHz, CDCl<sub>3</sub>) δ -4.73; **HRMS** (ESI) Calcd. for C<sub>32</sub>H<sub>33</sub>N<sub>2</sub>NaO<sub>8</sub>P (M+Na)<sup>+</sup> 627.1867, Found: 627.1923; **HPLC** (Chiral AD-H, λ = 254 nm, hexane/2-propanol/MeOH = 80/10:5, Flow rate = 0.5 mL/min), t<sub>R</sub>(*syn*) = 16.52 min, 19.02 min.

### (2*R*,3*R*)-4-ethyl 1-methyl 2-((bis(2,6-dimethylphenoxy)phosphoryl)amino)-3-((4-methoxyphenyl)amino)-2-phenylsuccinate(4b)

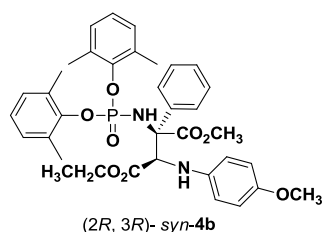

(2*R*, 3*R*)-*syn*-4b: 95% ee; <sup>1</sup>H NMR (400MHz, CDCl<sub>3</sub>): 7.38-7.40 (m, 2H), 7.20-7.22(m, 3H), 6.89-6.97 (m, 6H), 6.68-6.76(m, 4H), 5.41 (d, *J* = 10.0 Hz, 1H), 5.25 (d, *J* = 6.4 Hz, 1H), 4.63(d, *J* = 10.4 Hz, 1H), 3.94-3.96(m, 1H), 3.71-3.74 (m, 7H), 2.22 (s, 6H), 2.15 (s, 6H), 0.93 (t, *J* = 7.2 Hz, 3H); <sup>13</sup>C NMR (100 MHz,

CDCl<sub>3</sub>): δ 13.76, 17.23, 17.27, 53.54, 55.68, 61.26, 62.29, 67.27, 67.32, 114.75, 115.52, 124.77, 124.86, 127.50, 128.18, 128.30, 128.80, 128.99, 130.36, 130.39, 130.43, 136.83, 139.82, 148.24(d, *J*<sub>CP</sub> = 3.56 Hz), 148.33(d, *J*<sub>CP</sub> = 1.94 Hz), 152.89, 172.03; <sup>31</sup>P (162 MHz, CDCl<sub>3</sub>) δ -6.07; **HRMS**

(ESI) Calcd. for  $C_{36}H_{41}N_2NaO_8P$  ( $M+Na$ )<sup>+</sup> 683.2493, Found:683.2548; **HPLC** (Chiral AD-H,  $\lambda$  = 254 nm, hexane/2-propanol = 15/1, Flow rate = 1.0 mL/min),  $t_R(\text{syn})$  = 6.49 min, 8.05 min.

**(2R,3R)-4-ethyl 1-methyl 2-((bis(2,6-dimethylphenoxy)phosphoryl)amino)-2-(4-fluorophenyl)-3-((4-methoxyphenyl)amino)succinate(4c)**

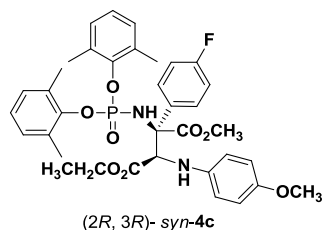

(2R, 3R)- *syn*-4c

(2R, 3R)-*syn*-4c: 91% ee; <sup>1</sup>H NMR (400MHz, CDCl<sub>3</sub>): 7.32-7.35 (m, 2H), 6.96-6.98 (m, 3H), 6.82-6.90(m, 5H), 6.67-6.76 (m, 4H) , 5.39 (d,  $J$  = 10.8 Hz, 1H), 5.23 (d,  $J$  = 7.2 Hz, 2H), 4.54 (d,  $J$  = 10.0 Hz, 1H), 3.97-4.00 (m, 1H), 3.74-3.80(m, 7H), 2.25 (s, 6H), 2.15 (s, 6H), 1.57(s, 3H), 0.97 (t,  $J$  = 7.2 Hz, 3H ); <sup>13</sup>C

NMR (100 MHz, CDCl<sub>3</sub>):  $\delta$  13.79, 17.19, 17.28, 53.66, 55.67, 61.41, 62.35, 66.80, 66.84, 114.80, 115.03, 115.55, 124.85, 124.96, 128.86, 129.04, 129.53, 129.62, 130.30, 139.55, 148.08(d,  $J_{CP}$  =15.71 Hz), 148.29 (d,  $J_{CP}$  =14.90 Hz), 153.03, 171.84; <sup>31</sup>P (162 MHz, CDCl<sub>3</sub>)  $\delta$  -5.14; **HRMS** (ESI) Calcd. for  $C_{36}H_{40}FN_2NaO_8P$  ( $M+Na$ )<sup>+</sup> 701.2399, Found:701.2422; **HPLC** (Chiral AD-H,  $\lambda$  = 254 nm, hexane/2-propanol = 10/1, Flow rate = 1.0 mL/min),  $t_R(\text{syn})$  = 5.06 min, 6.17 min.

**(2R,3R)-4-ethyl 1-methyl 2-((bis(2,6-dimethylphenoxy)phosphoryl)amino)-2-(4-chlorophenyl)-3-((4-methoxyphenyl)amino)succinate(4d)**

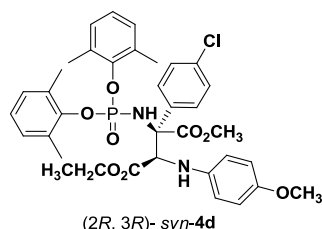

(2R, 3R)- *syn*-4d

(2R, 3R)-*syn*-4d: 90% ee; <sup>1</sup>H NMR (400MHz, CDCl<sub>3</sub>): 7.27 (d,  $J$  = 9.2 Hz, 2H), 7.25 (d,  $J$  = 8.8 Hz, 2H), 6.90-7.00 (m, 6H) , 6.75 (d,  $J$  = 8.8 Hz, 2H), 6.68 (d,  $J$  = 8.8 Hz, 2H), 5.40 (d,  $J$  = 7.6 Hz, 1H), 5.22 (d,  $J$  = 7.6Hz, 1H), 4.52 (d,  $J$  =10.8 Hz, 1H), 3.98-4.00 (m, 1H), 3.74-3.79 (m, 7H), 2.26(s, 6H), 2.14 (s, 6H),

0.98 (t,  $J$  = 7.0 Hz, 3H ); <sup>13</sup>C NMR (100 MHz, CDCl<sub>3</sub>):  $\delta$  13.80, 17.17, 17.29, 53.73, 55.68, 61.45, 62.15, 66.87, 66.92, 114.83, 115.54, 124.87, 124.99, 128.18, 128.90, 129.07, 130.28, 134.24, 135.40, 139.50, 148.25, 148.34, 153.05, 171.77; <sup>31</sup>P (162 MHz, CDCl<sub>3</sub>)  $\delta$  -6.12; **HRMS** (ESI) Calcd. for  $C_{36}H_{40}ClN_2NaO_8P$  ( $M+Na$ )<sup>+</sup> 717.2103, Found:717.2133; **HPLC** (Chiral IA,  $\lambda$  = 254 nm, hexane/2-propanol = 15/1, Flow rate = 1.0 mL/min),  $t_R(\text{syn})$  = 6.63 min, 7.37 min.

**(2R,3R)-dimethyl 2-((bis(2,6-dimethylphenoxy)phosphoryl)amino)-3-((4-methoxyphenyl)amino)-2-phenylsuccinate(4e)**

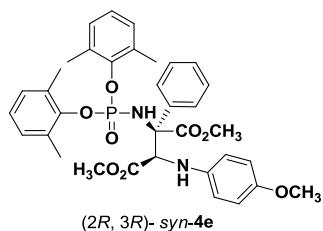

(2R, 3R)-*syn*-4e: 98% ee; <sup>1</sup>H NMR (400MHz, CDCl<sub>3</sub>): 7.42-7.43(m, 2H), 7.25-7.28(m, 3H), 6.93-7.03(m, 6H), 6.79(d, *J* = 8.4 Hz, 2H), 6.72(d, *J* = 8.4 Hz, 2H), 5.54 (d, *J* = 10.4 Hz, 1H), 5.29 (d, *J* = 6.4 Hz, 1H), 4.68 (d, *J* = 10.8 Hz, 1H), 3.80(s, 3H), 3.77 (s, 3H), 3.39 (s, 3H) 2.27 (s, 6H), 2.18 (s, 6H); <sup>13</sup>C NMR (100 MHz, CDCl<sub>3</sub>): δ 17.23, 17.27, 52.05, 53.72, 55.67, 61.77, 67.38, 67.42, 114.86, 115.34, 124.79, 124.90, 127.52, 128.24, 128.34, 128.83, 129.09, 130.34, 130.37, 130.41, 136.84, 139.70, 148.22 (d, *J*<sub>CP</sub> = 8.10 Hz), 148.32 (d, *J*<sub>CP</sub> = 9.72 Hz), 152.90, 172.60; <sup>31</sup>P (162 MHz, CDCl<sub>3</sub>) δ -5.61; HRMS (ESI) Calcd. for C<sub>35</sub>H<sub>39</sub>N<sub>2</sub>NaO<sub>8</sub>P (M+Na)<sup>+</sup> 669.2336, Found:669.2354; HPLC (Chiral AD-H, λ = 254 nm, hexane/2-propanol = 30/1, Flow rate = 1.0 mL/min), t<sub>R</sub>(*syn*) = 14.56min, 18.96 min.

**(2R,3R)-4-ethyl 1-methyl 2-((bis(2,6-dimethylphenoxy)phosphoryl)amino)-2-(4-bromophenyl)-3-((4-methoxyphenyl)amino)succinate(4f)**

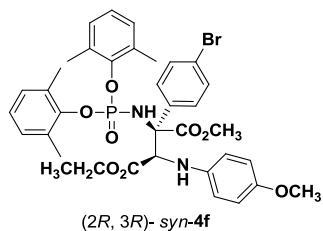

(2R, 3R)-*syn*-4f: 97% ee; <sup>1</sup>H NMR (400MHz, CDCl<sub>3</sub>): 7.23-7.30 (m, 4H), 6.93-7.01(m, 4H), 6.78(d, *J* = 8.8 Hz, 2H), 6.71 (d, *J* = 8.8 Hz, 2H), 5.44 (d, *J* = 10.8 Hz, 1H), 5.24 (d, *J* = 7.2 Hz, 1H), 4.56 (d, *J* = 10.8 Hz, 1H), 3.99-4.07(m, 1H), 3.77-3.83 (m, 7H), 2.29 (s, 6H), 2.17 (s, 6H), 2.13 (s, 6H), 1.01 (t, *J* = 7.0 Hz, 3H); <sup>13</sup>C NMR (100 MHz, CDCl<sub>3</sub>): δ 13.83, 17.19, 17.31, 53.76, 55.67, 61.46, 62.03, 66.92, 66.97, 114.84, 115.52, 122.58, 149.90, 124.99, 128.92, 129.06, 129.39, 130.28, 131.14, 135.95, 139.48, 147.97(d, *J*<sub>CP</sub> = 15.39 Hz), 148.30(d, *J*<sub>CP</sub> = 14.42 Hz), 153.06, 171.77; HRMS (ESI) Calcd. for C<sub>36</sub>H<sub>40</sub>BrN<sub>2</sub>NaO<sub>8</sub>P (M+Na)<sup>+</sup> 761.1598, Found:761.1587; <sup>31</sup>P (162 MHz, CDCl<sub>3</sub>) δ -6.12; HPLC (Chiral IA, λ = 254 nm, hexane/2-propanol = 10/1, Flow rate = 1.0 mL/min), t<sub>R</sub>(*syn*) = 5.55 min, 6.23 min.

**(2R,3R)-4-isopropyl 1-methyl 2-((bis(2,6-dimethylphenoxy)phosphoryl)amino)-2-(4-bromophenyl)-3-((4-methoxyphenyl)amino)succinate(4g)**

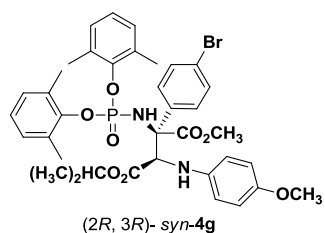

(2*R*, 3*R*)-*syn*-**4g**: 95% ee; <sup>1</sup>H NMR (400MHz, CDCl<sub>3</sub>): 7.26-7.28 (m, 4H), 6.94-7.01 (m, 6H), 6.78(d, *J* = 8.4 Hz, 2H), 6.71(d, *J* = 8.4 Hz, 2H), 5.24-5.32 (m, 2H), 4.84 (m, 1H), 4.54 (d, *J* = 10.4 Hz, 1H), 3.77 (s, 3H), 3.70 (s, 3H), 2.33 (s, 6H), 2.20 (s, 6H), 1.08 (d, *J* = 6.0 Hz, 3H), 1.00 (d, *J* = 6.0 Hz, 3H); <sup>13</sup>C NMR (100 MHz, CDCl<sub>3</sub>): δ 17.23, 17.37, 21.40, 21.50, 53.51, 55.68, 62.90, 67.10, 67.14, 69.60, 114.75, 115.71, 122.50, 124.87, 125.00, 128.94, 129.04, 129.31, 130.26, 131.02, 136.03, 139.66, 147.94 (d, *J*<sub>CP</sub> = 15.23 Hz), 148.52 (d, *J*<sub>CP</sub> = 15.07 Hz), 153.09, 171.14; <sup>31</sup>P (162 MHz, CDCl<sub>3</sub>) δ -6.10; HRMS (ESI) Calcd. for C<sub>37</sub>H<sub>42</sub>BrN<sub>2</sub>NaO<sub>8</sub>P (M+Na)<sup>+</sup> 775.1754, Found: 775.1760; HPLC (Chiral IA, λ = 254 nm, hexane/2-propanol = 15/1, Flow rate = 1.0 mL/min), t<sub>R</sub>(*syn*) = 7.69 min, 9.74 min.

**(2*R*,3*R*)-4-tert-butyl 1-methyl 2-((bis(2,6-dimethylphenoxy)phosphoryl)amino)-2-(4-bromophenyl)-3-((4-methoxyphenyl)amino)succinate(4h)**

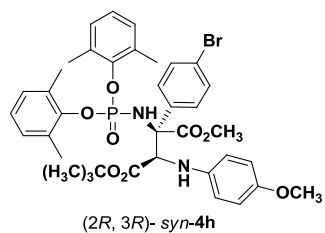

(2*R*, 3*R*)-*syn*-**4h**: 84% ee; <sup>1</sup>H NMR (400MHz, CDCl<sub>3</sub>): 7.27-7.29 (m, 4H), 6.94-7.04 (m, 6H), 6.80 (d, *J* = 9.2 Hz, 2H), 6.73 (d, *J* = 8.8 Hz, 2H), 5.26 (d, *J* = 8.0 Hz, 1H), 5.18 (d, *J* = 10.4 Hz, 1H), 4.48 (d, *J* = 10.4 Hz, 1H), 3.78 (s, 3H), 3.65 (s, 3H), 2.37(s, 6H), 2.23(s, 6H), 1.30(s, 9H); <sup>13</sup>C NMR (100 MHz, CDCl<sub>3</sub>): δ 7.59, 16.17, 16.28, 16.44, 26.71, 28.68, 44.81, 52.31, 54.66, 81.81, 113.50, 113.70, 114.80, 121.36, 123.81, 123.93, 127.93, 128.02, 128.13, 128.40, 128.67, 129.20, 129.83, 129.89, 135.16, 138.84, 146.92 (d, *J*<sub>CP</sub> = 15.39 Hz), 147.69 (d, *J*<sub>CP</sub> = 15.55 Hz), 152.08, 169.68; <sup>31</sup>P (162 MHz, CDCl<sub>3</sub>) δ -6.12; HRMS (ESI) Calcd. for C<sub>38</sub>H<sub>45</sub>BrN<sub>2</sub>NaO<sub>8</sub>P (M+Na)<sup>+</sup> 767.2091, Found: 767.2083; HPLC (Chiral IA, λ = 254 nm, hexane/2-propanol = 15/1, Flow rate = 1.0 mL/min), t<sub>R</sub>(*syn*) = 7.11 min, 9.76 min.

**(2*R*,3*R*)-dimethyl 2-((bis(2,6-dimethylphenoxy)phosphoryl)amino)-2-(4-bromophenyl)-3-((4-methoxyphenyl)amino)succinate(4i)**

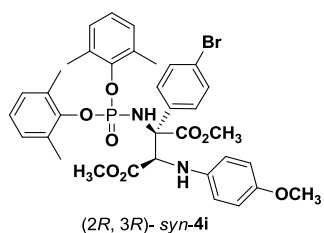

(2R, 3R)-syn-4i: 96% ee; <sup>1</sup>H NMR (400MHz, CDCl<sub>3</sub>): 7.17-7.26 (m, 4H), 6.89-7.00 (m, 6H), 6.75 (d, *J* = 8.8 Hz, 2H), 6.66 (d, *J* = 9.2 Hz, 2H), 5.49 (d, *J* = 10.8 Hz, 1H), 5.20 (d, *J* = 7.2 Hz, 1H), 4.54 (d, *J* = 10.8 Hz, 1H), 3.79 (s, 3H), 3.72 (s, 3H), 3.39 (s, 3H), 2.26 (s, 6H), 2.13 (s, 6H); <sup>13</sup>C NMR (100 MHz, CDCl<sub>3</sub>): δ 17.18, 17.30, 52.22, 53.92, 55.69, 61.52, 67.05, 67.09, 114.94, 115.32, 122.62, 124.93, 125.02, 128.95, 129.14, 129.38, 130.26, 131.20, 139.39, 147.73(d, *J*<sub>CP</sub> = 15.55 Hz), 148.25 (d, *J*<sub>CP</sub> = 14.58 Hz), 153.06, 172.34; <sup>31</sup>P (162 MHz, CDCl<sub>3</sub>) δ -6.23; HRMS (ESI) Calcd. for C<sub>35</sub>H<sub>39</sub>BrN<sub>2</sub>O<sub>8</sub>P (M+H)<sup>+</sup> 725.1622, Found: 725.1615; HPLC (Chiral IA, λ = 254 nm, hexane/2-propanol = 30/1, Flow rate = 1.0 mL/min), t<sub>R</sub>(syn) = 11.24 min, 12.84 min.

**(2R,3R)-dimethyl 2-((bis(2,6-dimethylphenoxy)phosphoryl)amino)-2-(4-chlorophenyl)-3-((4-methoxyphenyl)amino)succinate(4j)**

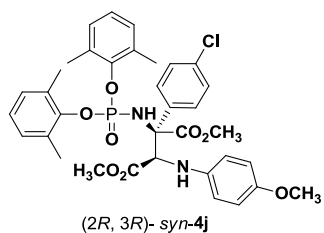

(2R, 3R)-syn-4j: 96% ee; <sup>1</sup>H NMR (400MHz, CDCl<sub>3</sub>): 7.25 (d, *J* = 8.8 Hz, 2H), 7.10 (d, *J* = 8.4 Hz, 2H), 6.90-6.98 (m, 6H), 6.76 (d, *J* = 9.2 Hz, 2H), 6.66 (d, *J* = 8.8 Hz, 2H), 5.54 (d, *J* = 10.8 Hz, 1H), 5.20 (d, *J* = 7.2 Hz, 1H), 4.53 (d, *J* = 10.8 Hz, 1H), 3.79 (s, 3H), 3.73 (s, 3H), 3.40 (s, 3H), 2.26 (s, 6H), 2.13 (s, 6H); <sup>13</sup>C NMR (100 MHz, CDCl<sub>3</sub>): δ 17.16, 17.27, 52.19, 53.88, 55.66, 61.59, 66.96, 67.01, 114.91, 115.32, 124.89, 124.99, 128.24, 128.90, 129.05, 129.11, 130.25, 130.28, 134.26, 135.37, 139.38, 148.00(d, *J*<sub>CP</sub> = 15.55 Hz), 148.22 (d, *J*<sub>CP</sub> = 14.42 Hz), 153.03, 172.35; <sup>31</sup>P (162 MHz, CDCl<sub>3</sub>) δ -6.21; HRMS (ESI) Calcd. for C<sub>35</sub>H<sub>38</sub>ClN<sub>2</sub>O<sub>8</sub>P (M+Na)<sup>+</sup> 703.1947, Found: 703.1947; HPLC (Chiral IA, λ = 254 nm, hexane/2-propanol = 40/1, Flow rate = 1.0 mL/min), t<sub>R</sub>(syn) = 12.10 min, 15.12 min.

**(2R,3R)-dimethyl 2-((bis(2,6-dimethylphenoxy)phosphoryl)amino)-2-(3-chlorophenyl)-3-((4-methoxyphenyl)amino)succinate(4k)**

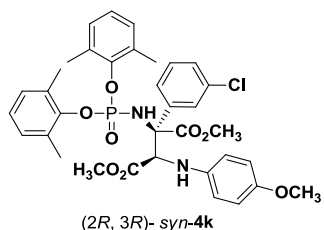

(2R, 3R)-syn-4k: 93% ee; <sup>1</sup>H NMR (400MHz, CDCl<sub>3</sub>): 7.47(s, 1H), 7.17-7.37(m, 3H), 6.95-7.06(m, 6H), 6.82 (d, *J* = 8.8 Hz, 2H), 6.74 (d, *J* = 8.8 Hz, 2H), 5.52 (d, *J* = 10.8 Hz, 1H), 5.29 (d, *J* = 6.8 Hz, 1H), 4.55 (d, *J* = 10.8 Hz, 1H), 3.81 (s, 6H), 3.78 (s,

6H), 3.44 (s, 3H), 2.32 (s, 6H), 2.23(s, 6H);  $^{13}\text{C}$  NMR (100 MHz,  $\text{CDCl}_3$ ):  $\delta$  17.25, 17.29, 52.23, 53.84, 55.66, 62.16, 67.35, 67.39, 114.93, 115.67, 124.97, 125.03, 125.92, 127.95, 128.60, 128.91, 129.14, 129.36, 130.26, 130.29, 130.35, 134.12, 139.52, 148.13 (d,  $J_{\text{CP}}=15.71$  Hz), 148.29 (d,  $J_{\text{CP}}=14.90$  Hz), 153.23, 172.21;  $^{31}\text{P}$  (162 MHz,  $\text{CDCl}_3$ )  $\delta$  -5.93; **HRMS** (ESI) Calcd. for  $\text{C}_{35}\text{H}_{38}\text{ClN}_2\text{O}_8\text{P}$  ( $\text{M}+\text{Na}$ ) $^+$  703.1947, Found:703.1964; **HPLC** (Chiral AD-H,  $\lambda = 254$  nm, hexane/2-propanol = 30/1, Flow rate = 1.0 mL/min),  $t_{\text{R}}(\text{syn}) = 12.08$  min, 19.61 min.

**(2R,3R)-dimethyl2-((bis(2,6-dimethylphenoxy)phosphoryl)amino)-2-(4-methoxyphenyl)-3-((4-methoxyphenyl)amino)succinate(4I)**

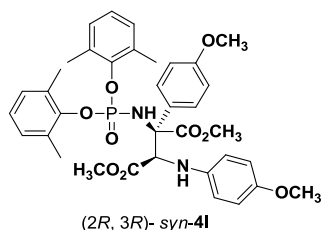

(2R, 3R)- syn-4I

(2R, 3R)-syn-4i: 94% ee;  $^1\text{H}$  NMR (400MHz,  $\text{CDCl}_3$ ): 7.27 (d,  $J = 8.8\text{Hz}$ , 2H), 6.88-6.97 (m, 6H), 6.66-6.75 (m, 6H), 5.48 (d,  $J = 10.4$  Hz, 1H), 5.21 (d,  $J = 6.4$  Hz, 1H), 4.62 (d,  $J = 10.4$  Hz, 1H), 3.77 (s, 3H), 3.71 (s, 6H), 3.36 (s, 3H), 2.23 (s, 6H), 2.15 (s, 6H);  $^{13}\text{C}$  NMR (100 MHz,  $\text{CDCl}_3$ ):  $\delta$  17.27, 17.30, 52.06, 53.72,

55.18, 55.67, 61.76, 66.99, 67.03, 113.55, 114.87, 115.27, 124.78, 124.90, 128.84, 128.88, 129.10, 130.33, 130.37, 130.42, 139.75, 148.23, 148.33(d,  $J_{\text{CP}}=3.24$  Hz), 152.86, 159.33, 172.66;  $^{31}\text{P}$  (162 MHz,  $\text{CDCl}_3$ )  $\delta$  -5.95; **HRMS** (ESI) Calcd. for  $\text{C}_{36}\text{H}_{42}\text{N}_2\text{O}_9\text{P}$  ( $\text{M}+\text{H}$ ) $^+$  677.2622, Found:677.2632; **HPLC** (Chiral IA,  $\lambda = 254$  nm, hexane/2-propanol = 20/1, Flow rate = 1.0 mL/min),  $t_{\text{R}}(\text{syn}) = 11.55$  min, 13.38 min.

**(2R,3R) -1-ethyl 4-methyl 2-((bis(2,6-dimethylphenoxy)phosphoryl)amino) -2-butyl-3-((4-methoxyphenyl)amino)succinate**

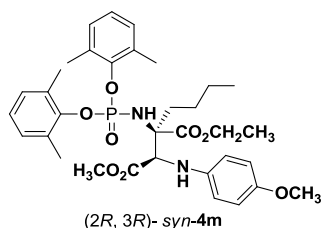

(2R, 3R)- syn-4m

(2R, 3R)-syn-4m: 79% ee;  $^1\text{H}$  NMR (400MHz,  $\text{CDCl}_3$ ): 6.97-7.04 (m, 9H), 6.62-6.77 (m, 6H), 4.84-4.89 (1.45, 2H), 4.65-4.72 (1.44, 2H), 4.35-4.40 (m, 4H), 3.87-3.92 (m, 2H), 3.75 (s, 6H), 2.48 (s, 6H), 2.42 (s, 3H), 2.32 (s, 3H), 2.27 (s, 7H), 1.38-1.42 (qt, H), 1.29 (s, 7H), 0.94-0.97 (t, 5H), 0.80-0.83 (t,

5H);  $^{13}\text{C}$  NMR (100 MHz,  $\text{CDCl}_3$ ):  $\delta$  1.03, 14.12, 17.30, 17.60, 29.71, 36.48, 37.75, 55.71, 55.79, 61.10, 62.76, 62.82, 63.64, 65.11, 67.53, 67.59, 114.77, 115.64, 124.96, 125.03, 129.09, 130.3, 130.34, 130.57, 130.60, 142.08, 148.52, 152.26, 171.22, 171.54, 172.83, 173.01;  $^{31}\text{P}$  (162 MHz,



$\text{CDCl}_3$ )  $\delta$  -2.35; **HRMS** (ESI) Calcd. for  $\text{C}_{34}\text{H}_{45}\text{N}_2\text{NaO}_8\text{P}$  ( $\text{M}+\text{H}$ )<sup>+</sup> 663.2806, Found:663.2864;

**HPLC** (Chiral IA,  $\lambda$  = 254 nm, hexane/2-propanol = 50/1, Flow rate = 1.0 mL/min),  $t_{\text{R}}(\text{syn})$  = 8.03 min, 8.64 min.

### (2*R*,3*R*)-ethyl

### 3-((bis(2,6-dimethylphenoxy)phosphoryl)amino)-2-((4-methoxyphenyl)amino)-4-oxo-4-phenylbutanoate(4n)

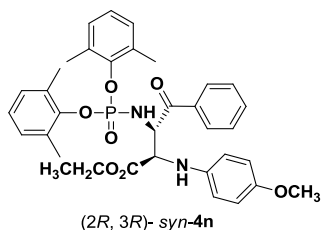

(2*R*, 3*R*)-*syn*-4n: 85% ee; <sup>1</sup>H NMR (400MHz,  $\text{CDCl}_3$ ):

7.90-7.92 (d,  $J$  = 8Hz, 2H), 7.40-7.58 (m, 5H), 7.05-7.06 (d,  $J$  =

5.2Hz, 3H), 6.87 (s, 3H), 6.72-6.74 (t,  $J$  = 3Hz, 2H), 6.578-6.60

(t,  $J$  = 3Hz, 2H), 5.50-5.53 (t,  $J$  = 5.1Hz 1H), 4.67 (m, 1H),

4.48-4.52 (t,  $J$  = 6.1Hz, 1H), 4.36-4.37 (d,  $J$  = 5.6Hz, 1H),

3.77-3.98 (m, 2H), 3.74 (s, 3H), 2.42 (s, 6H), 2.21 (s, 6H); <sup>31</sup>P (162 MHz,  $\text{CDCl}_3$ )  $\delta$  -0.94; **HRMS**

(ESI) Calcd. for  $\text{C}_{35}\text{H}_{39}\text{N}_2\text{O}_7\text{P}$  ( $\text{M}+\text{H}$ )<sup>+</sup> 631.2586, Found:631.2588; **HPLC** (Chiral IA,  $\lambda$  = 254 nm,

hexane/2-propanol = 6/1, Flow rate = 1.0 mL/min),  $t_{\text{R}}(\text{syn})$  = 12.30 min, 22.21 min.

### Single Crystal X-ray Structure Determinations of Compound *syn*-4i

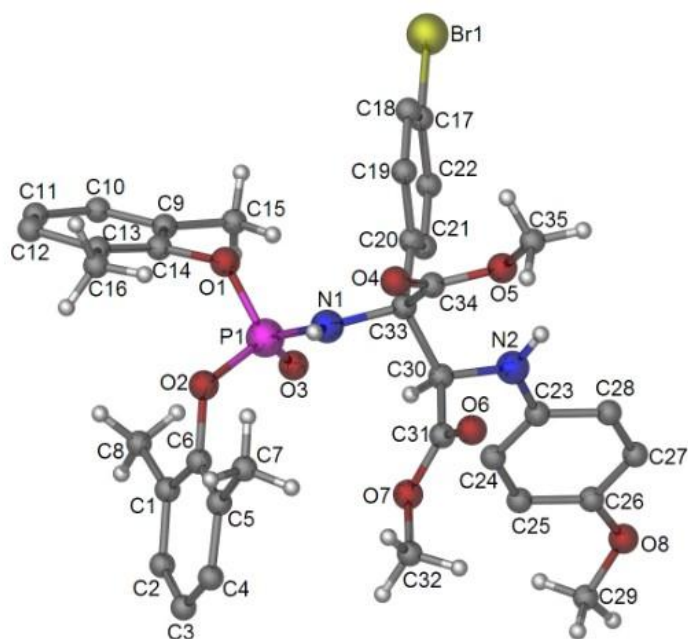

Bond precision:

C-C = 0.0127 Å

Wavelength=0.71073

Cell: a=16.9476(6)

b=14.5627(5)

c=15.6857(5)

alpha=90

beta=116.620(1)

gamma=90

Temperature: 296 K

|                               | Calculated         | Reported                        |
|-------------------------------|--------------------|---------------------------------|
| Volume                        | 3460.9(2)          | 3460.9(2)                       |
| Space group                   | P 21/c             | P2(1)/c                         |
| Hall group                    | -P 2ybc            | ?                               |
| Moiety formula                | C35 H38 Br N2 O8 P | ?                               |
| Sum formula                   | C35 H38 Br N2 O8 P | C35 H38 Br N2 O8 P              |
| Mr                            | 725.54             | 725.55                          |
| Dx,g cm-3                     | 1.393              | 1.392                           |
| Z                             | 4                  | 4                               |
| Mu (mm-1)                     | 1.287              | 1.287                           |
| F000                          | 1504.0             | 1504.0                          |
| F000'                         | 1503.92            |                                 |
| h,k,lmax                      | 20,17,18           | 20,17,18                        |
| Nref                          | 6100               | 6095                            |
| Tmin,Tmax                     | 0.911,0.950        | 0.811,0.950                     |
| Tmin'                         | 0.803              |                                 |
| Correction method= MULTI-SCAN |                    |                                 |
| Data completeness= 0.999      |                    | Theta(max)= 25.010              |
| R(reflections)= 0.0752( 3424) |                    | wR2(reflections)= 0.2318( 6095) |
| S = 1.040                     |                    | Npar= 424                       |

### $^1\text{H}$ NMR and $^{13}\text{C}$ NMR spectra for new compounds

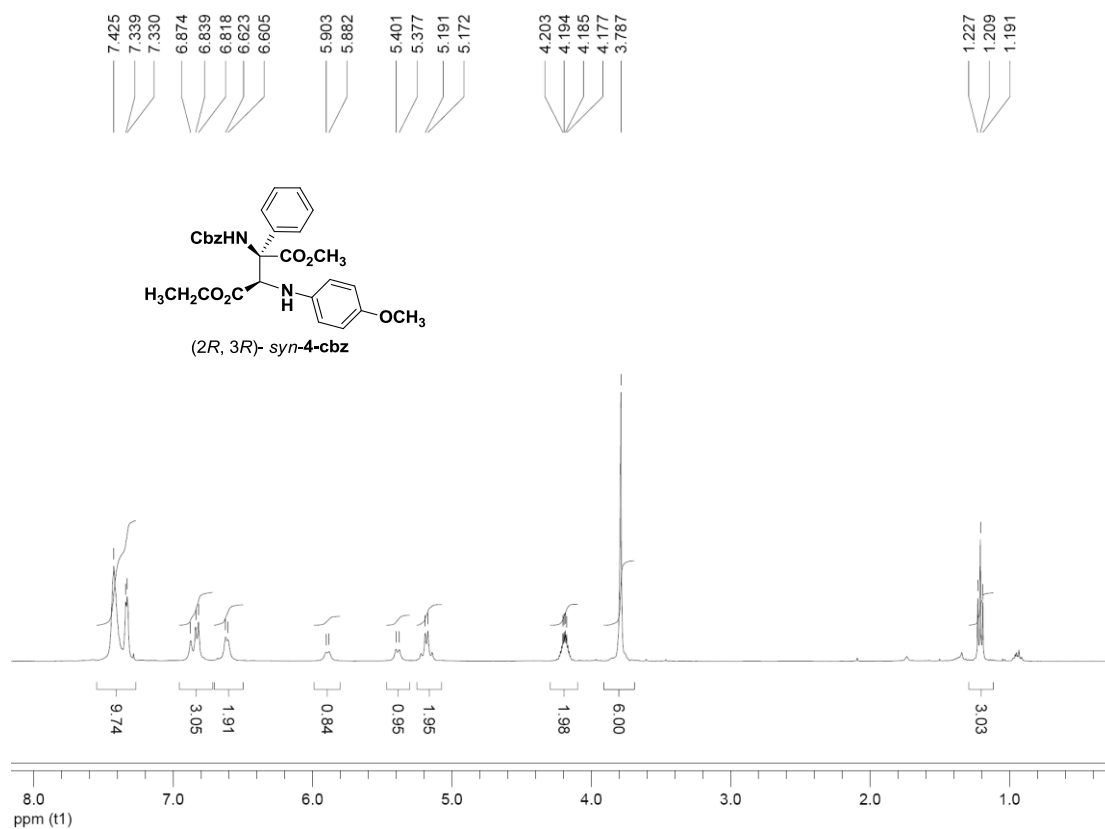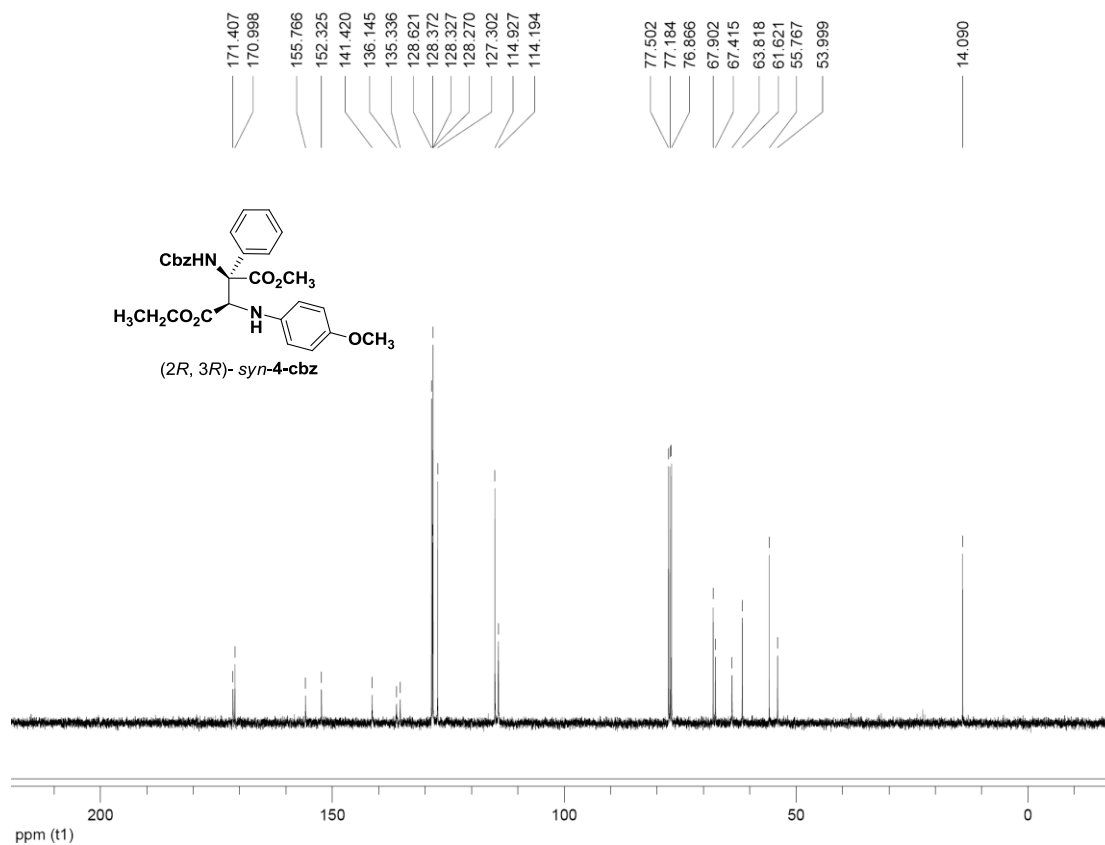

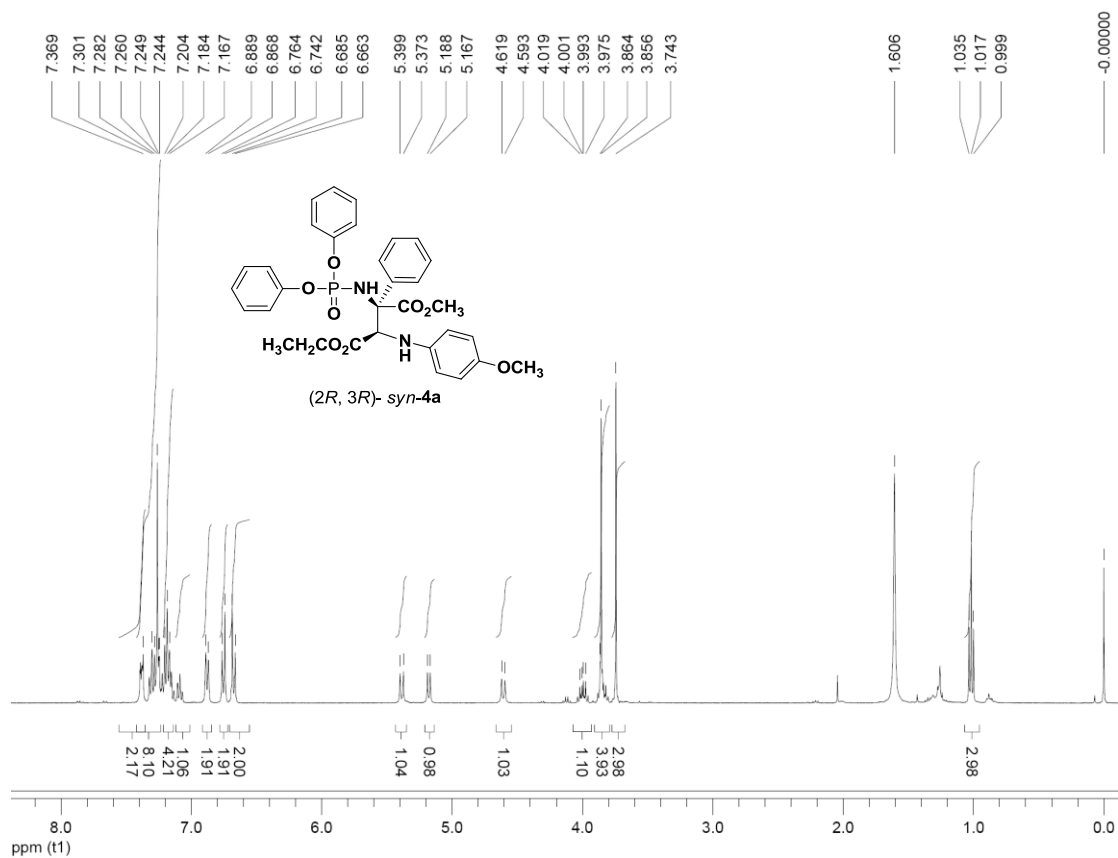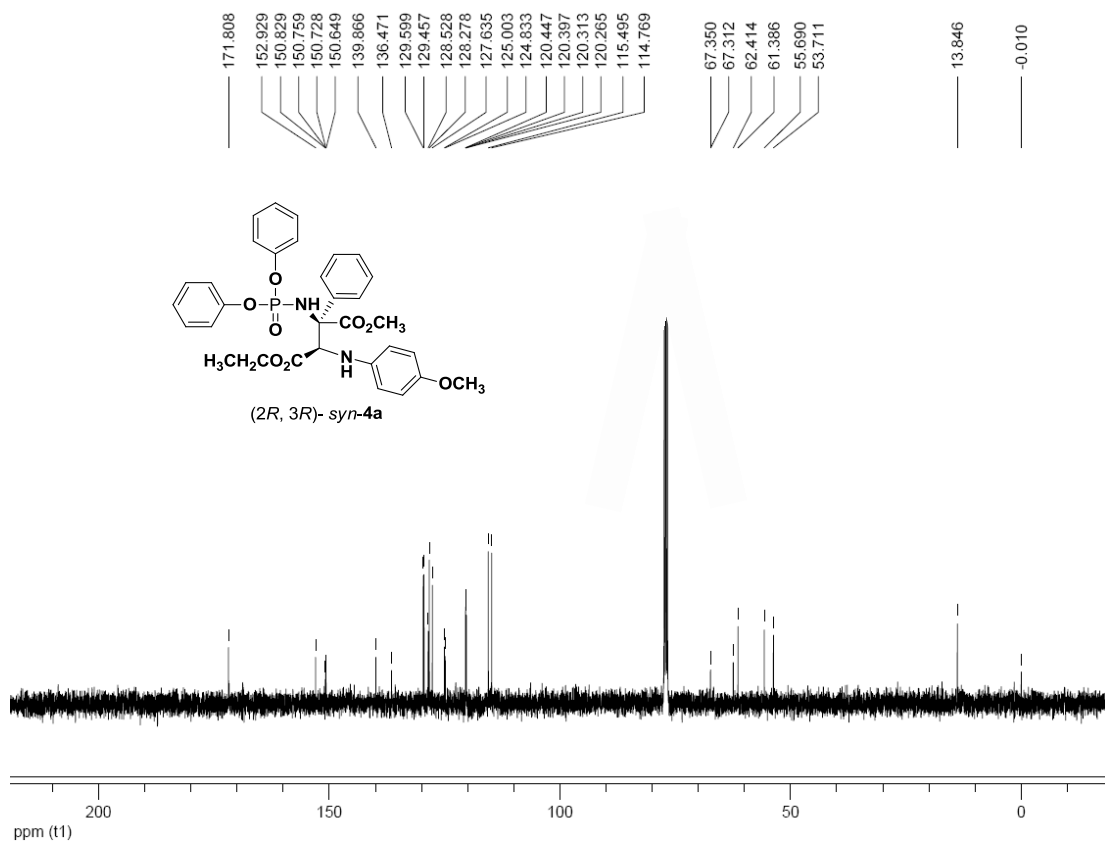

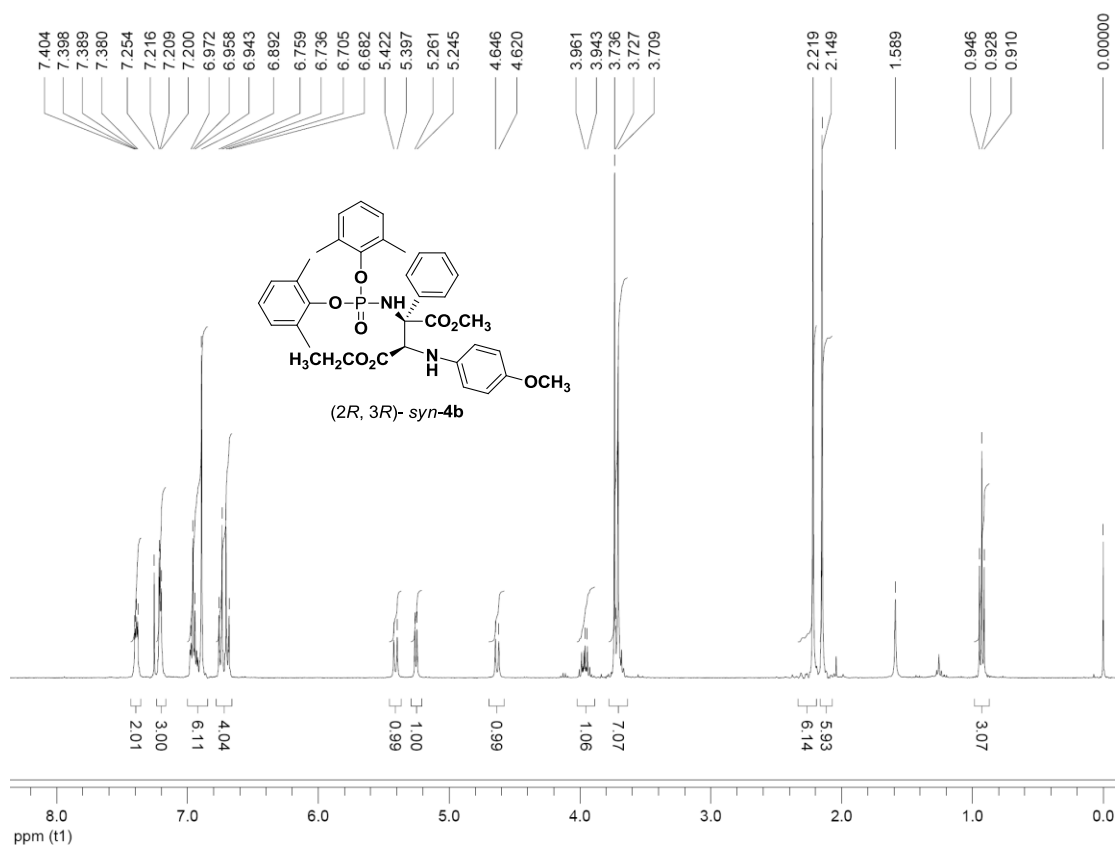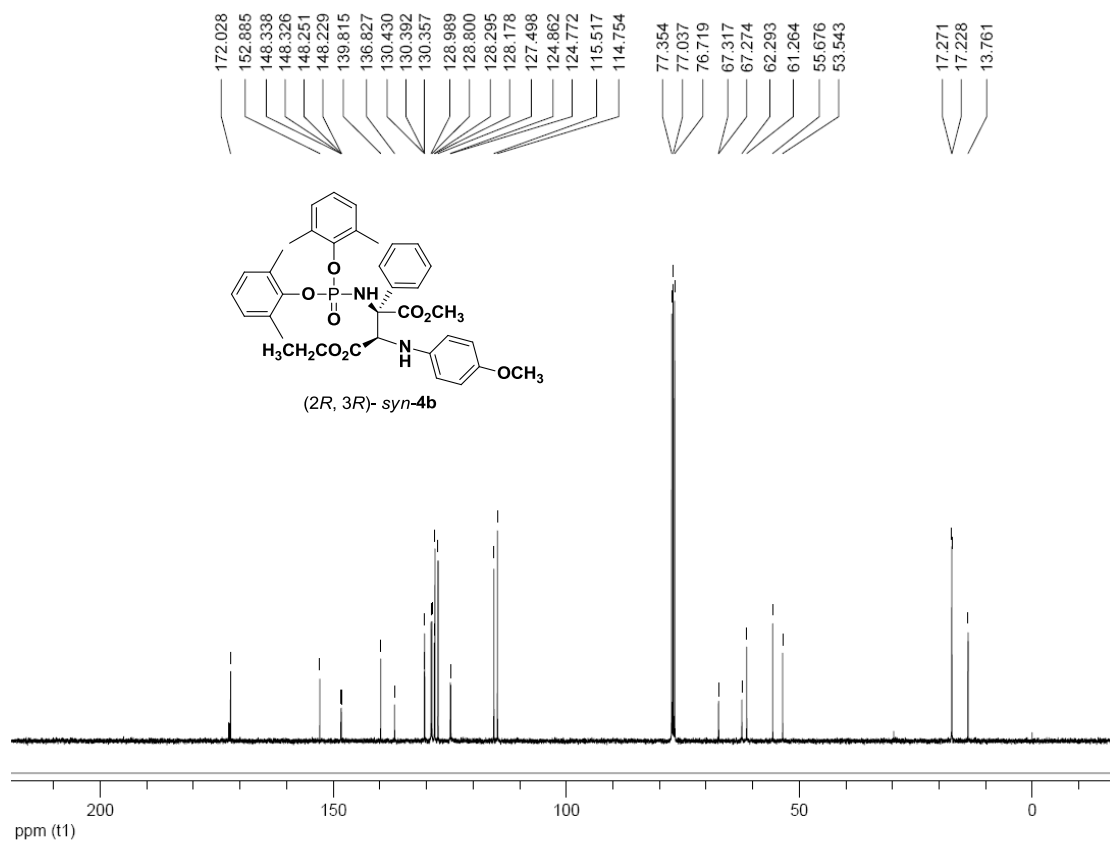

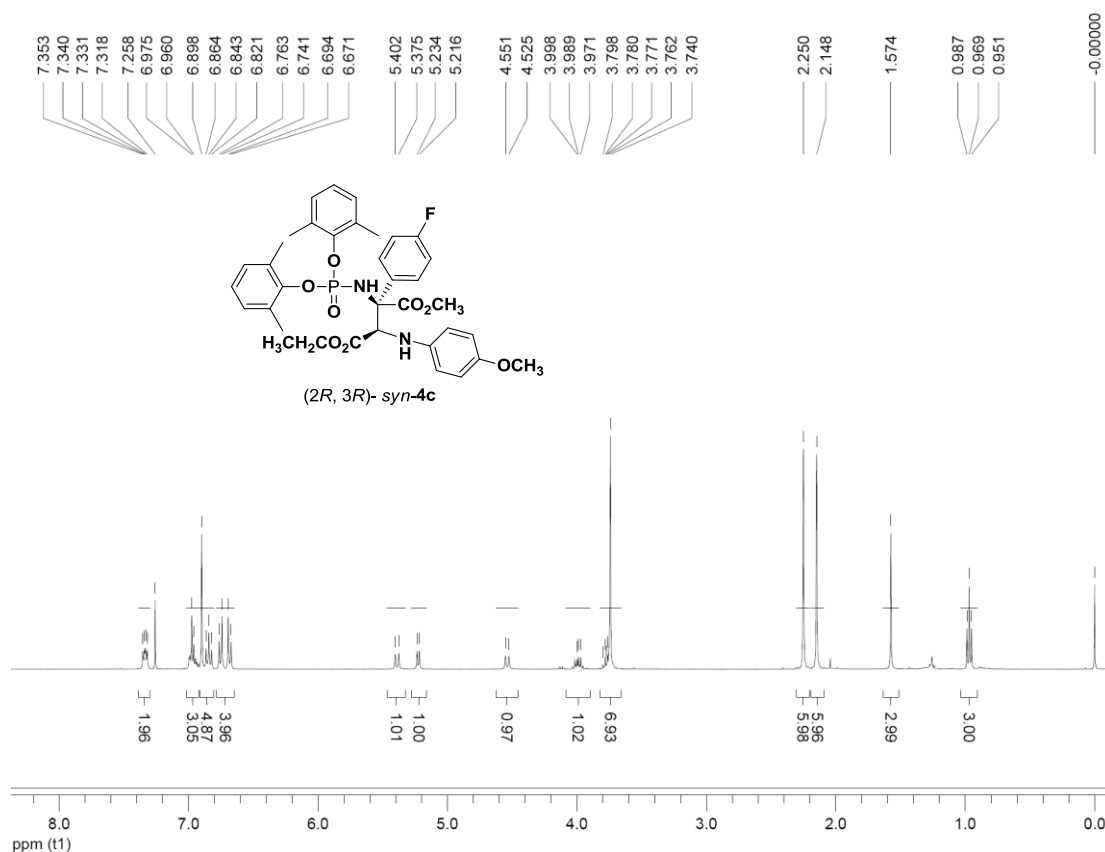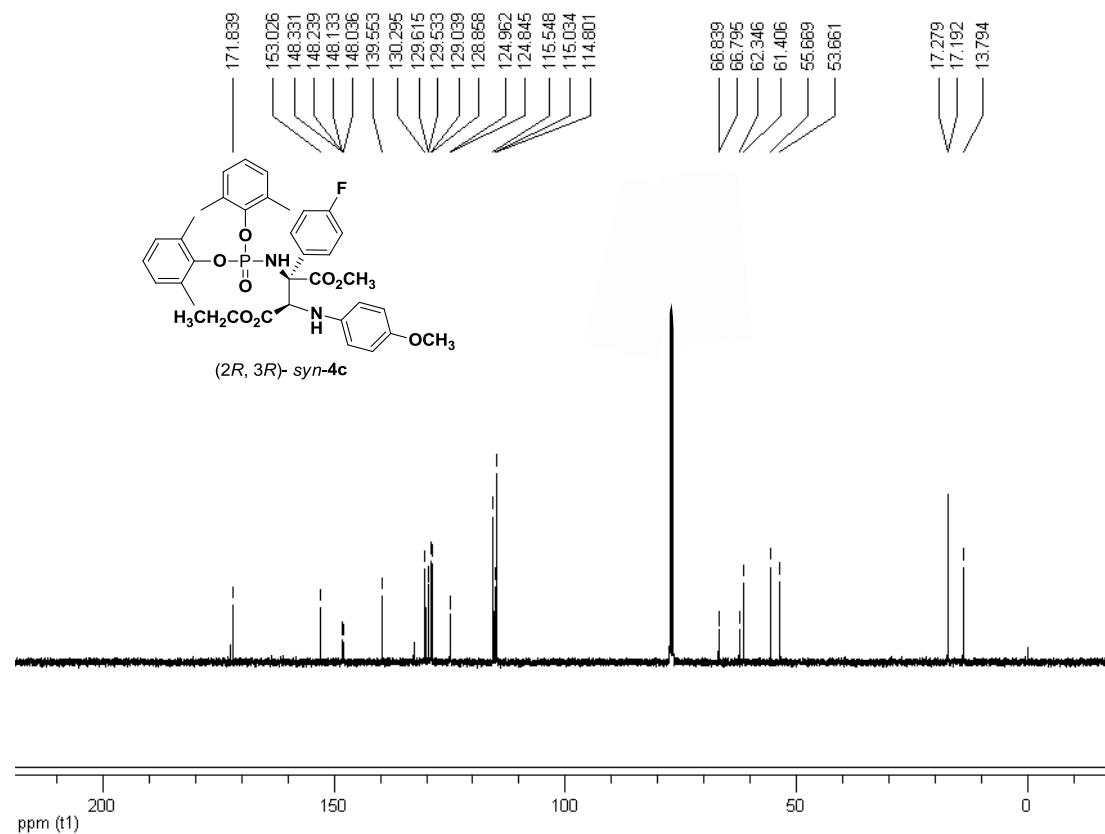

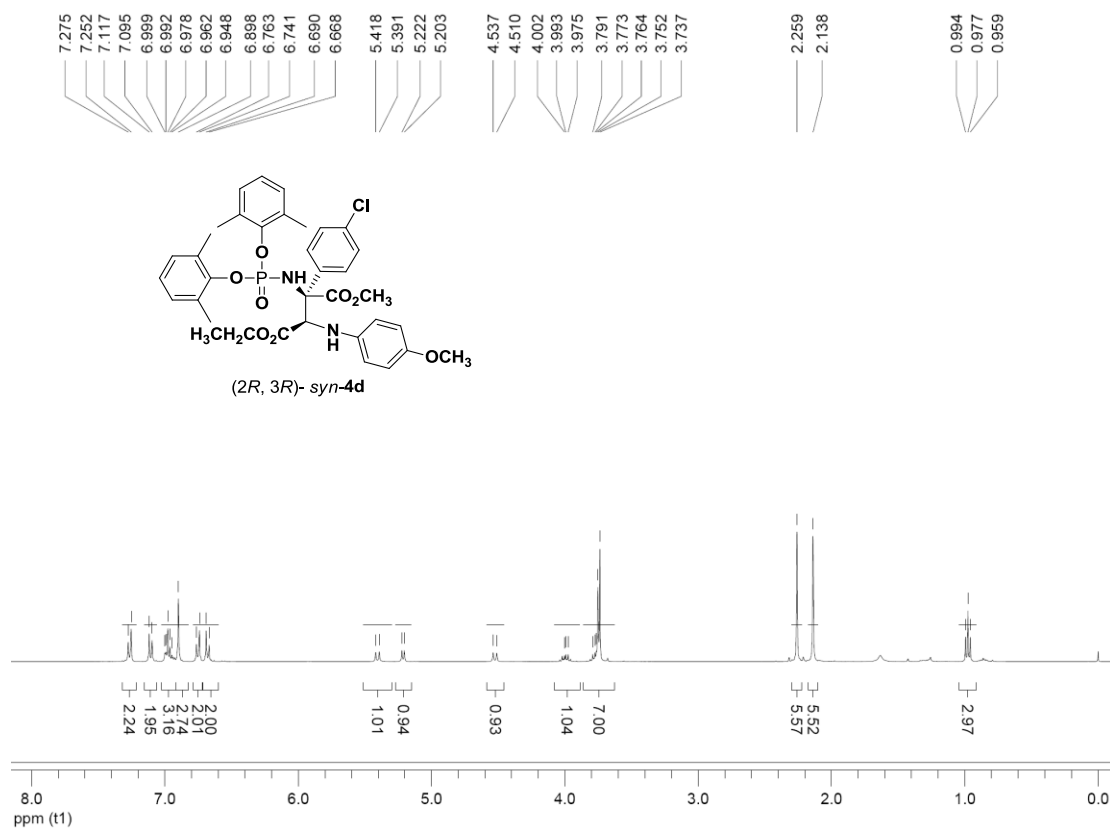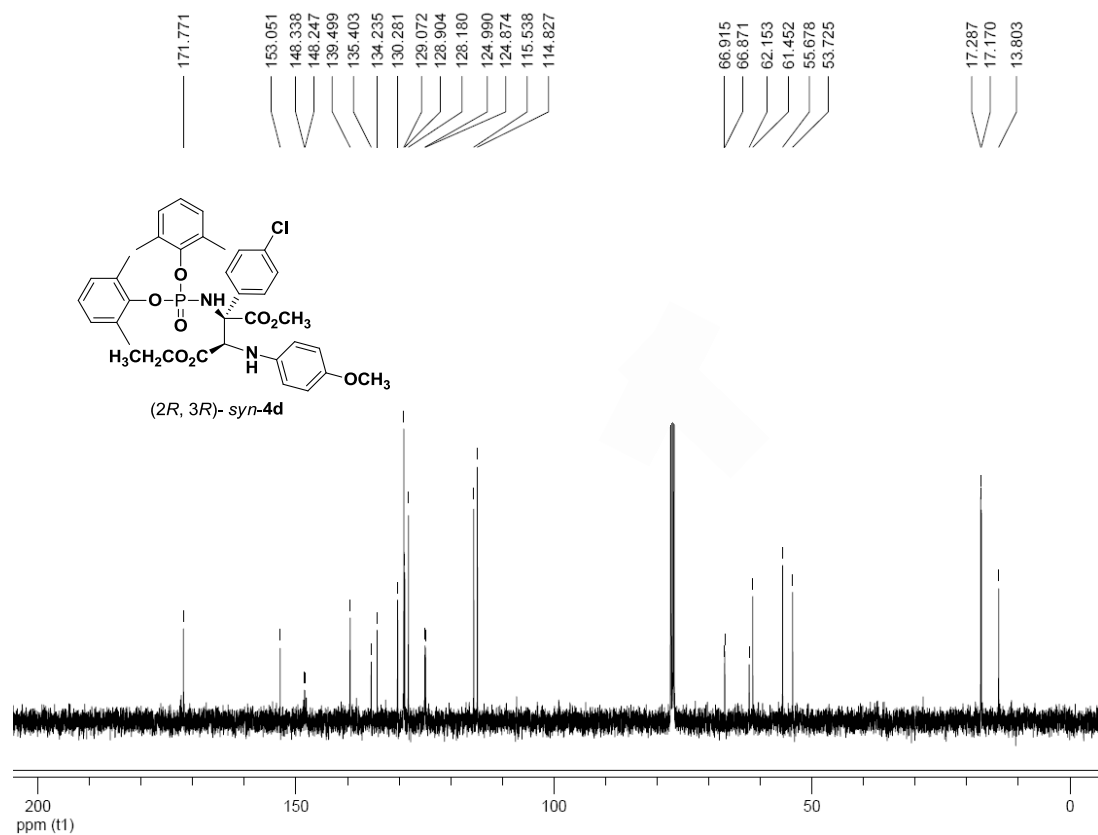

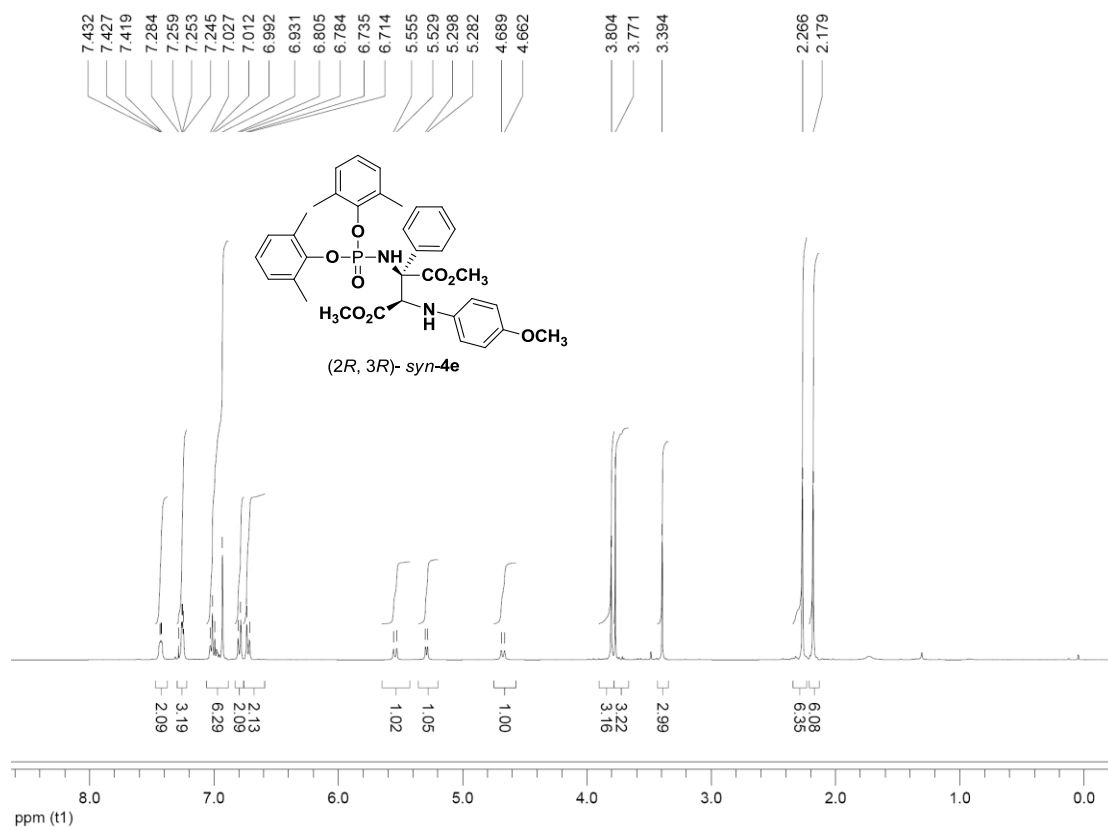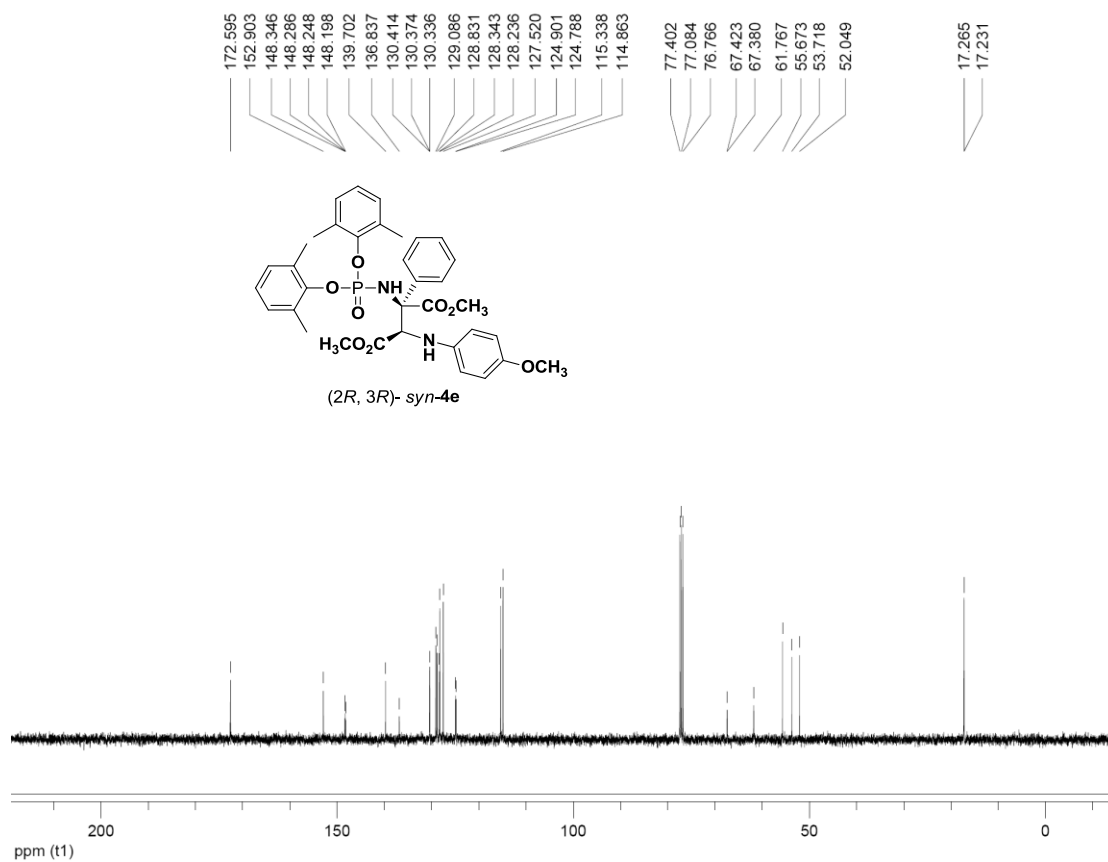



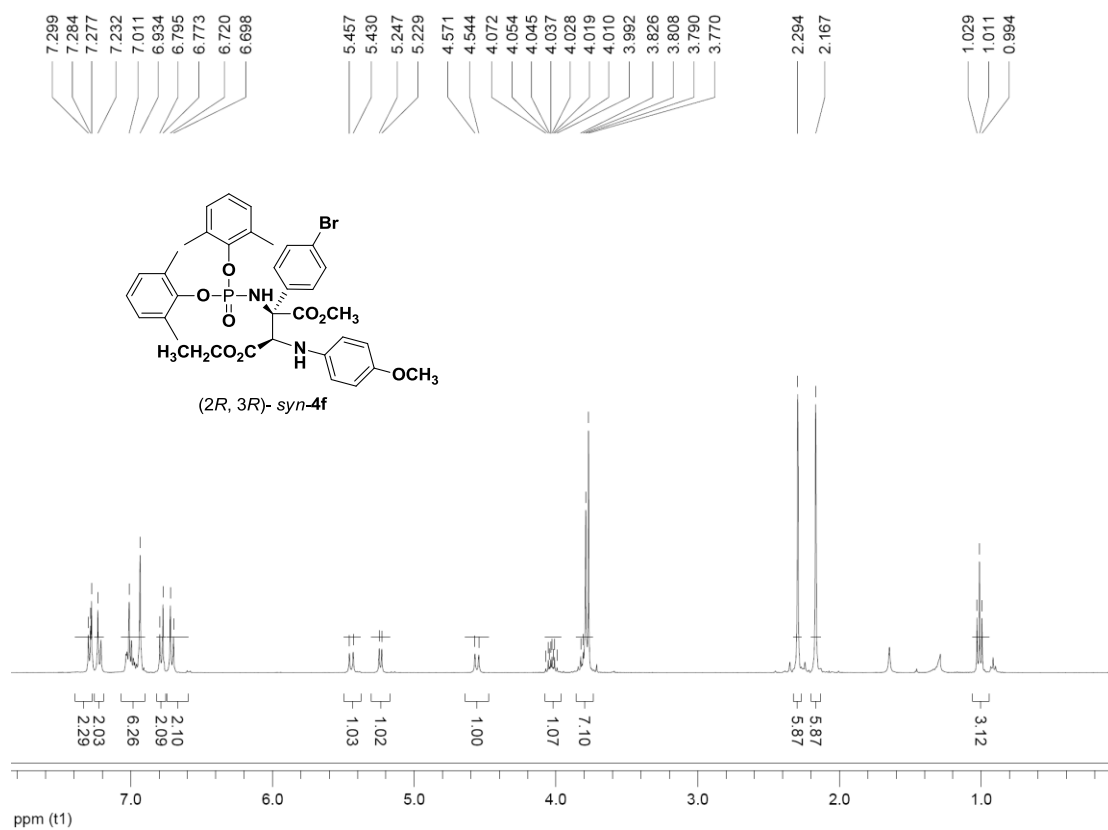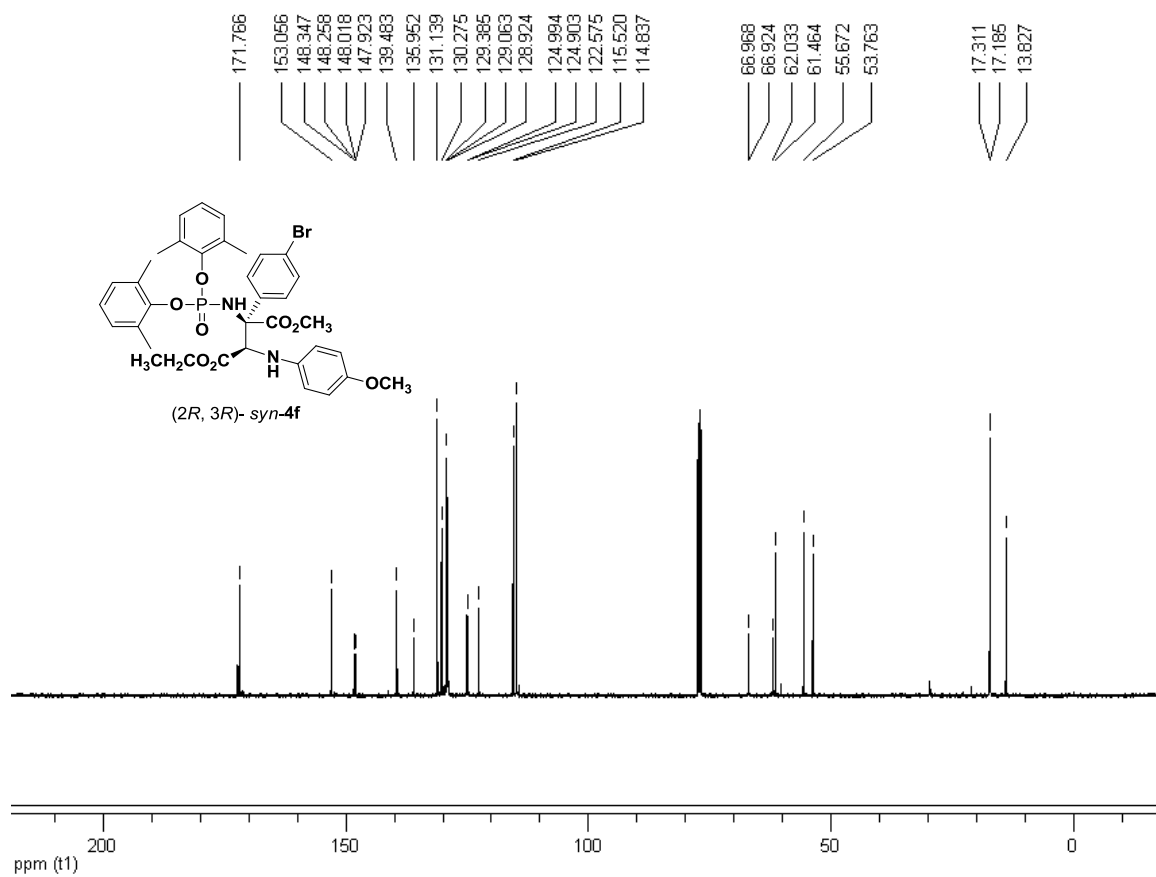

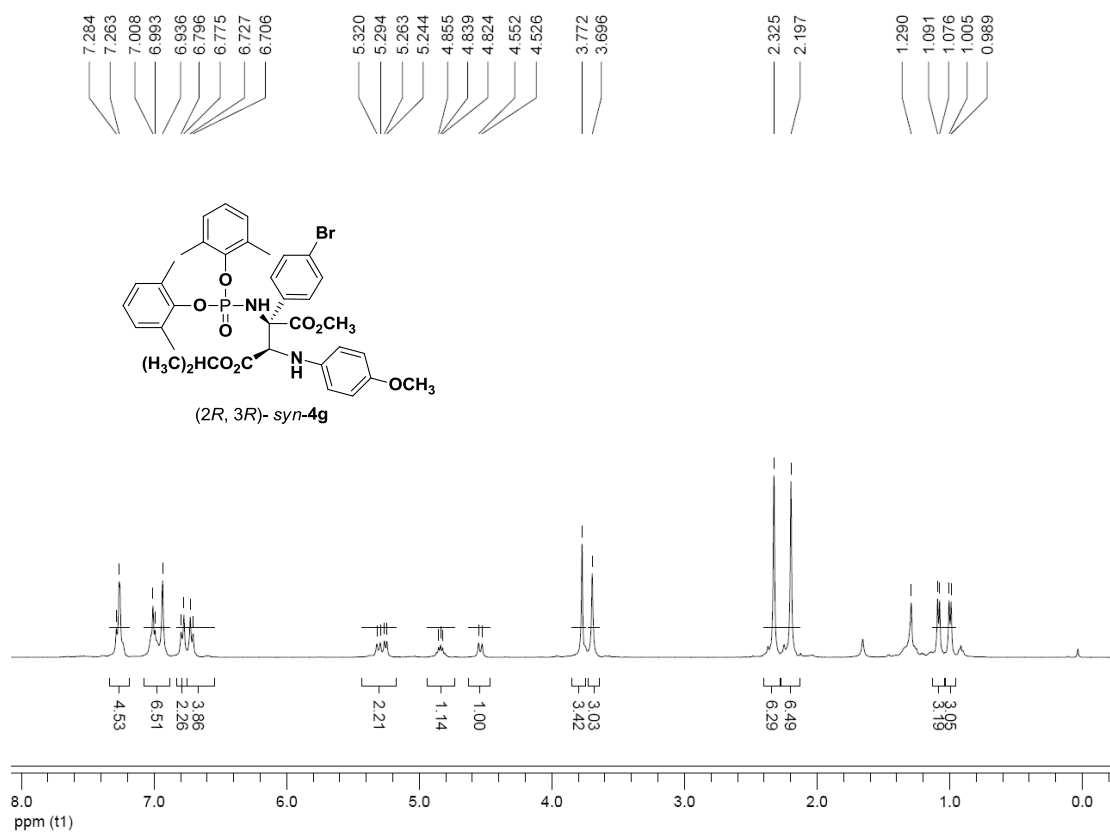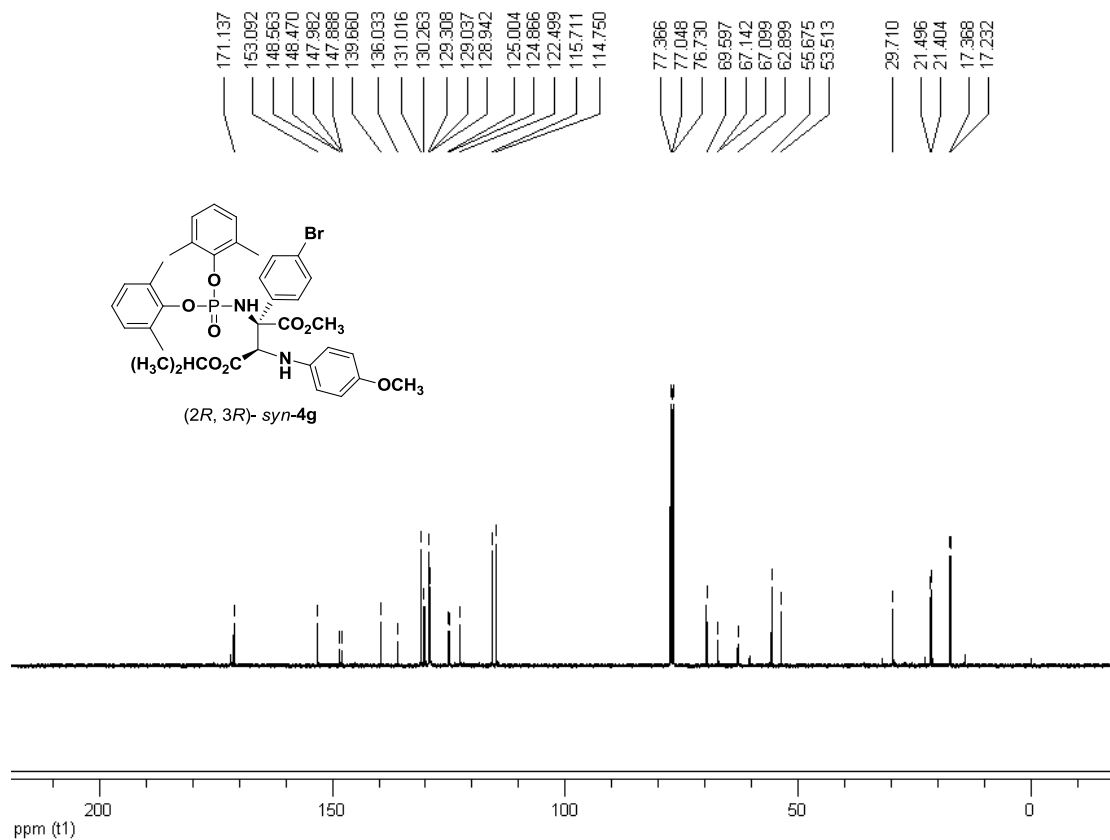

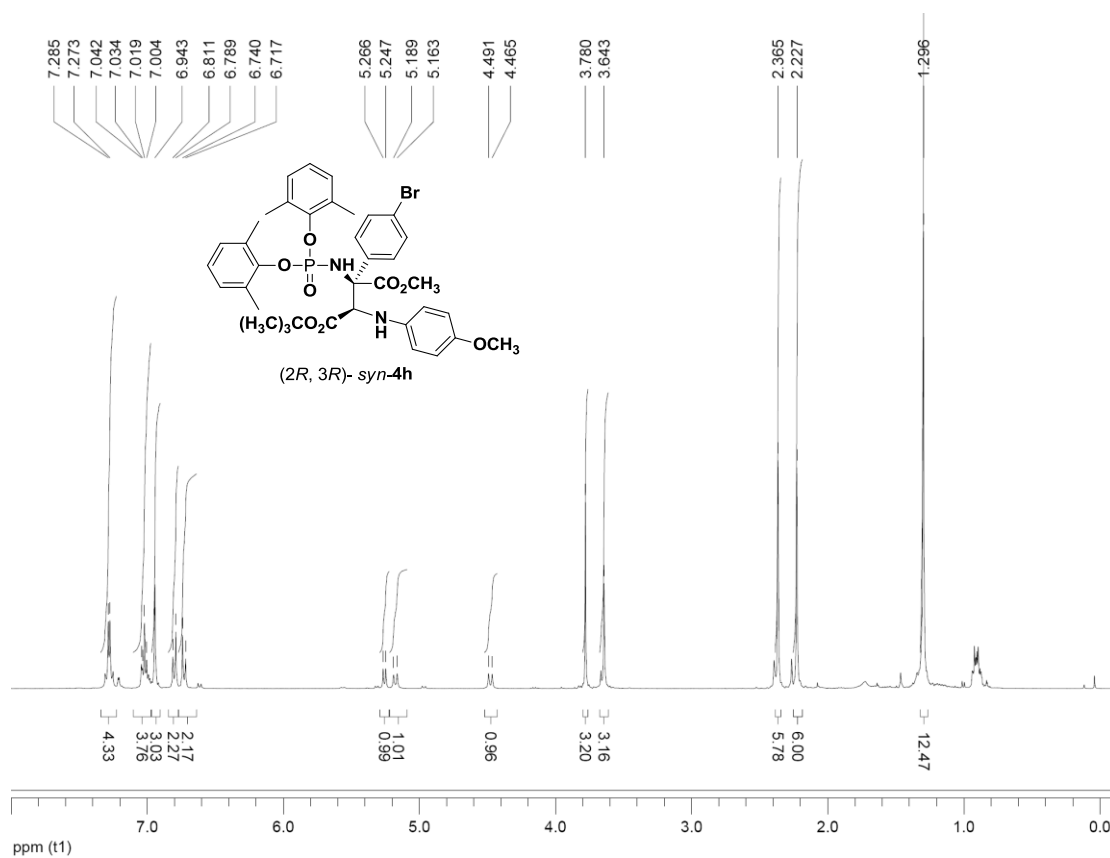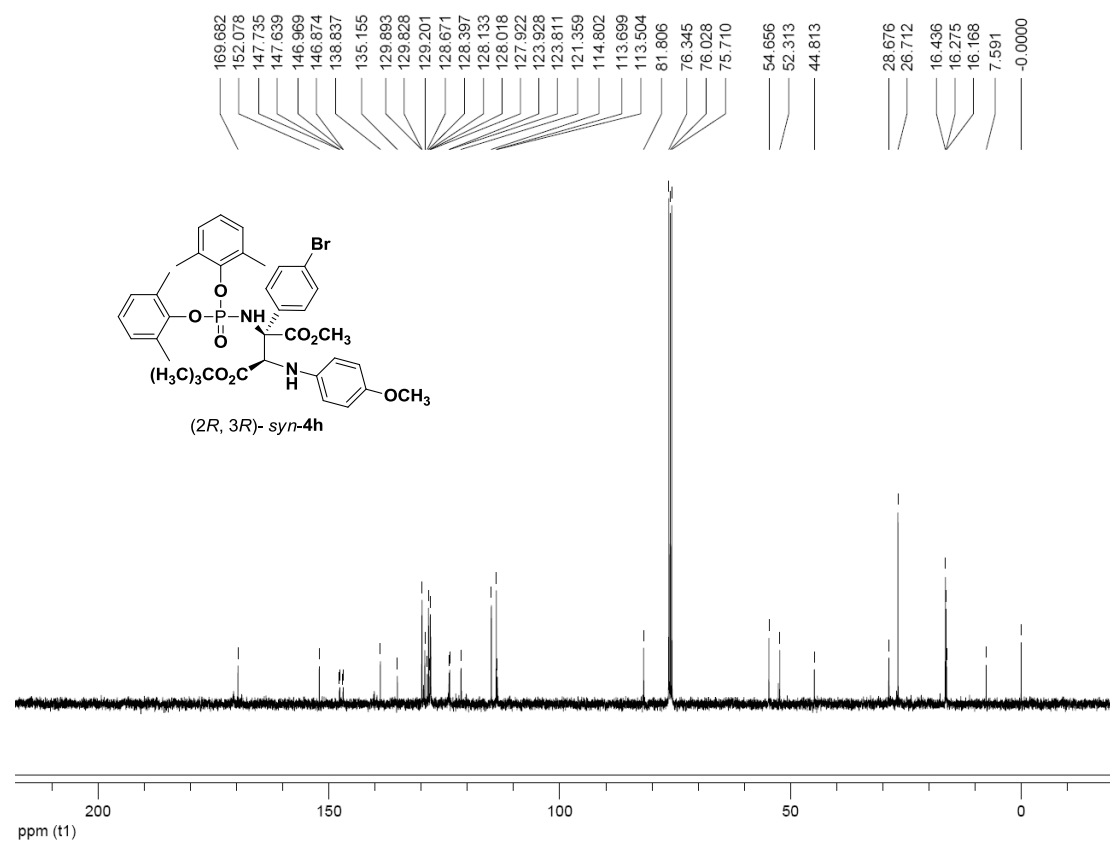

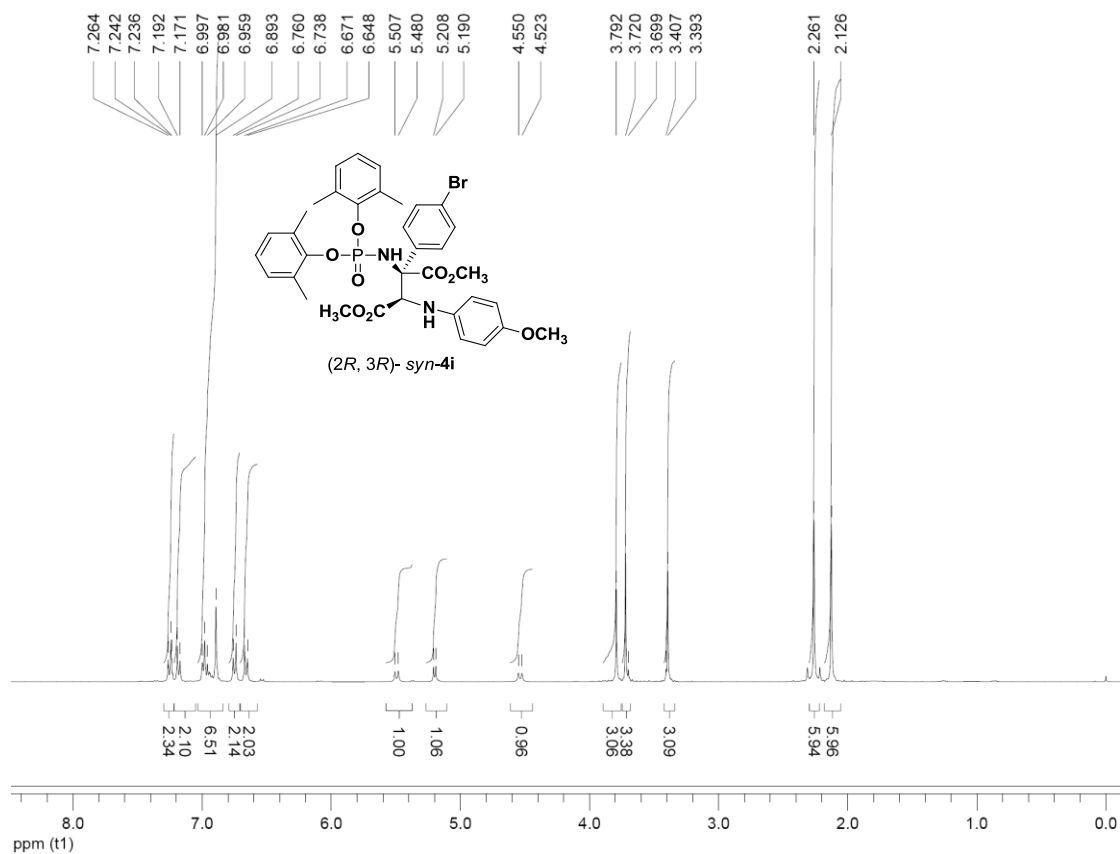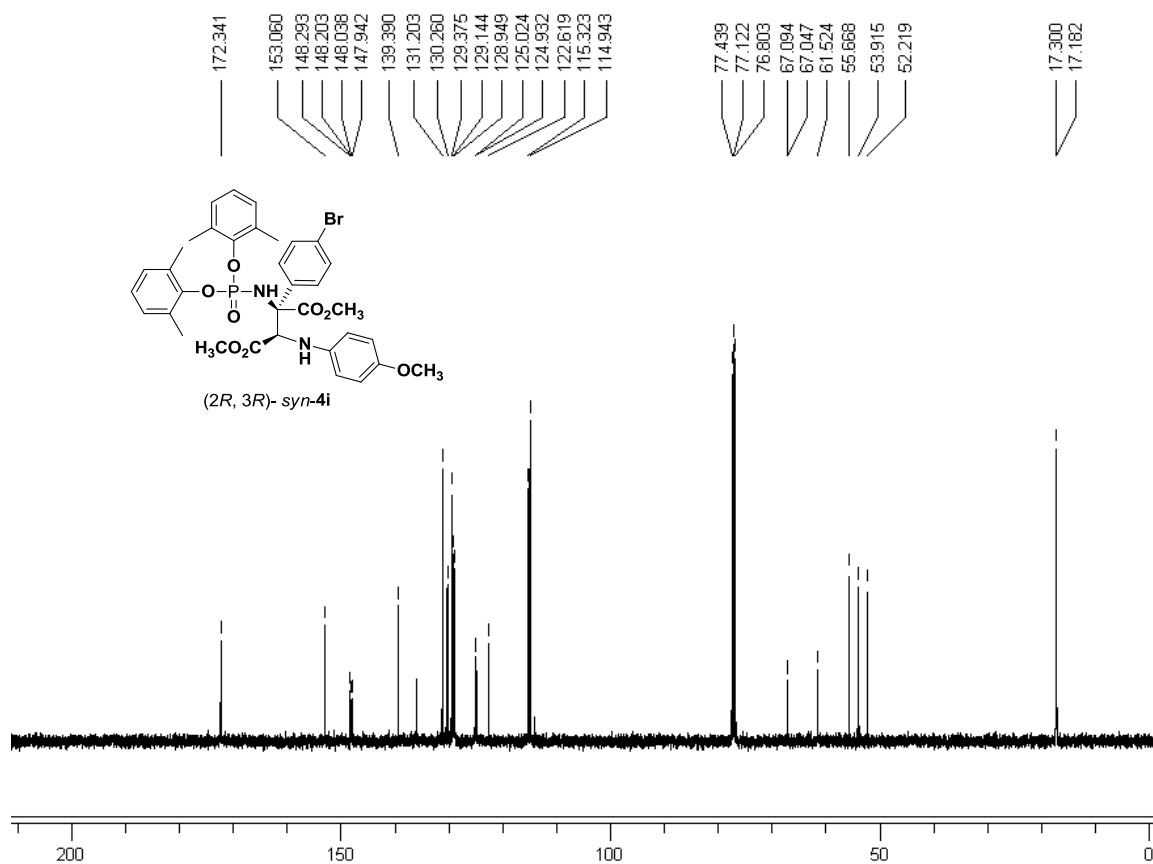

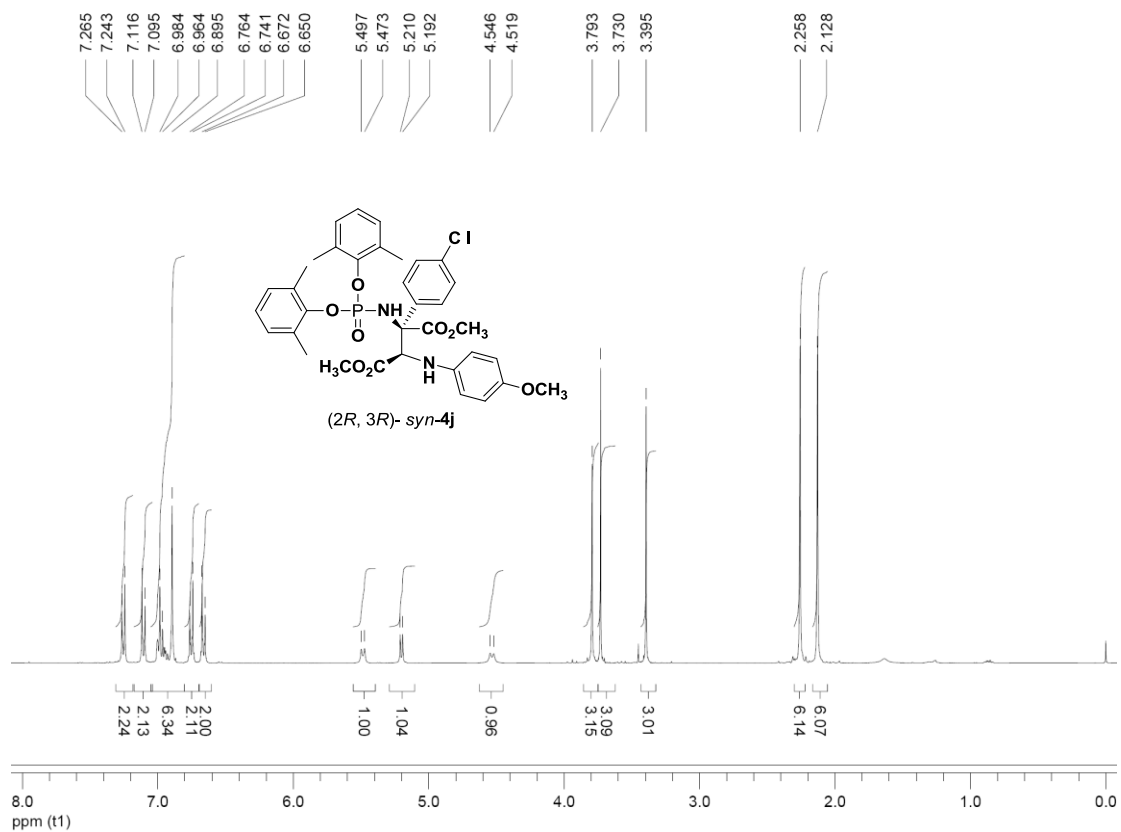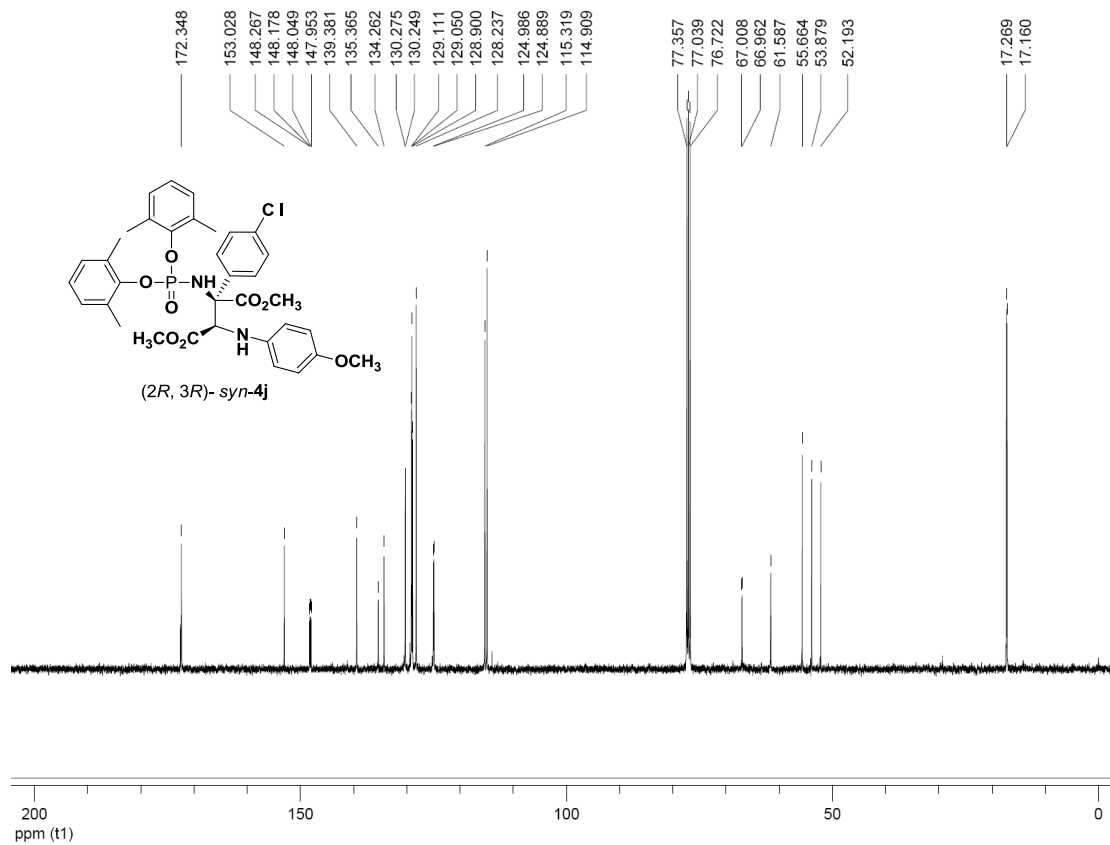

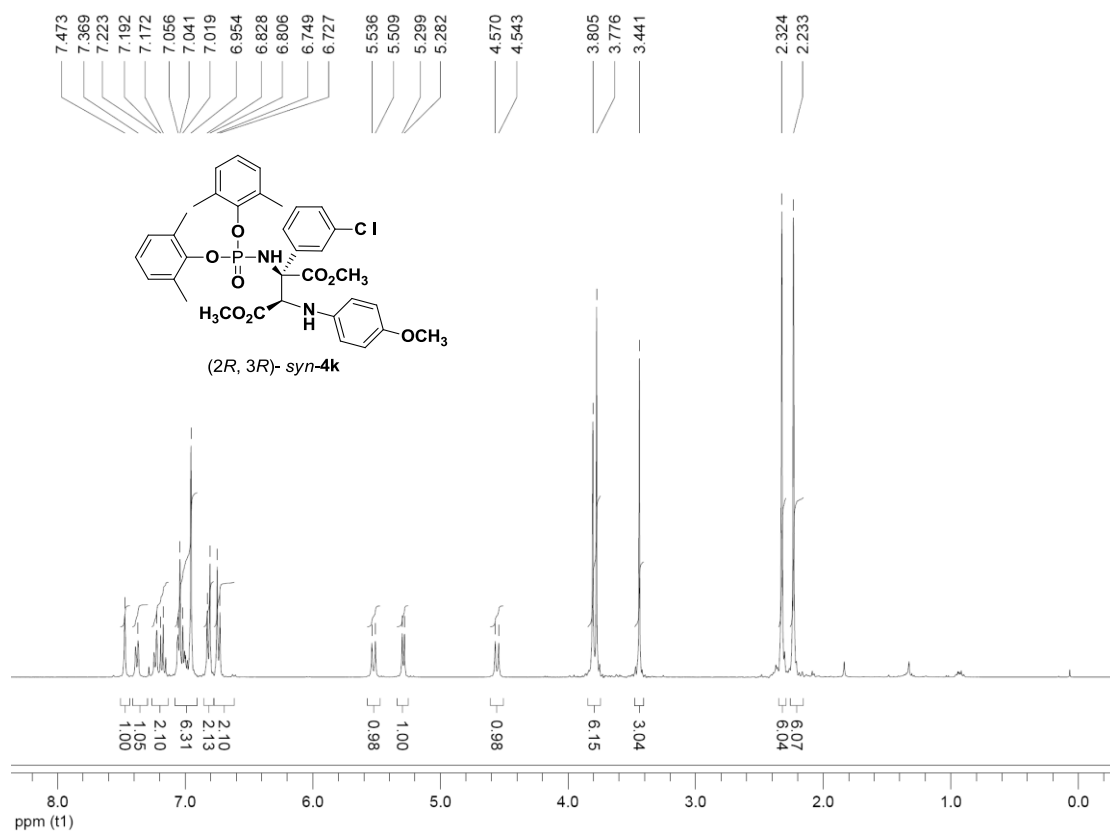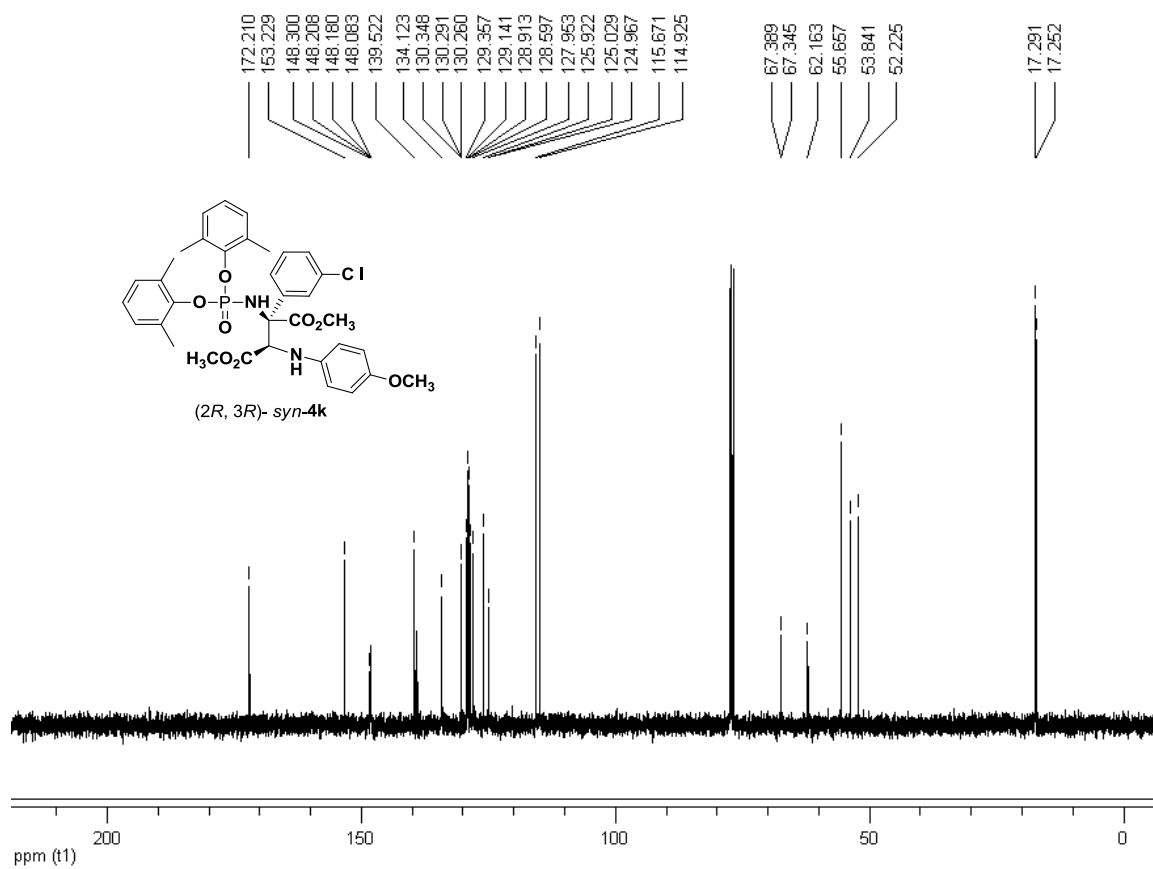

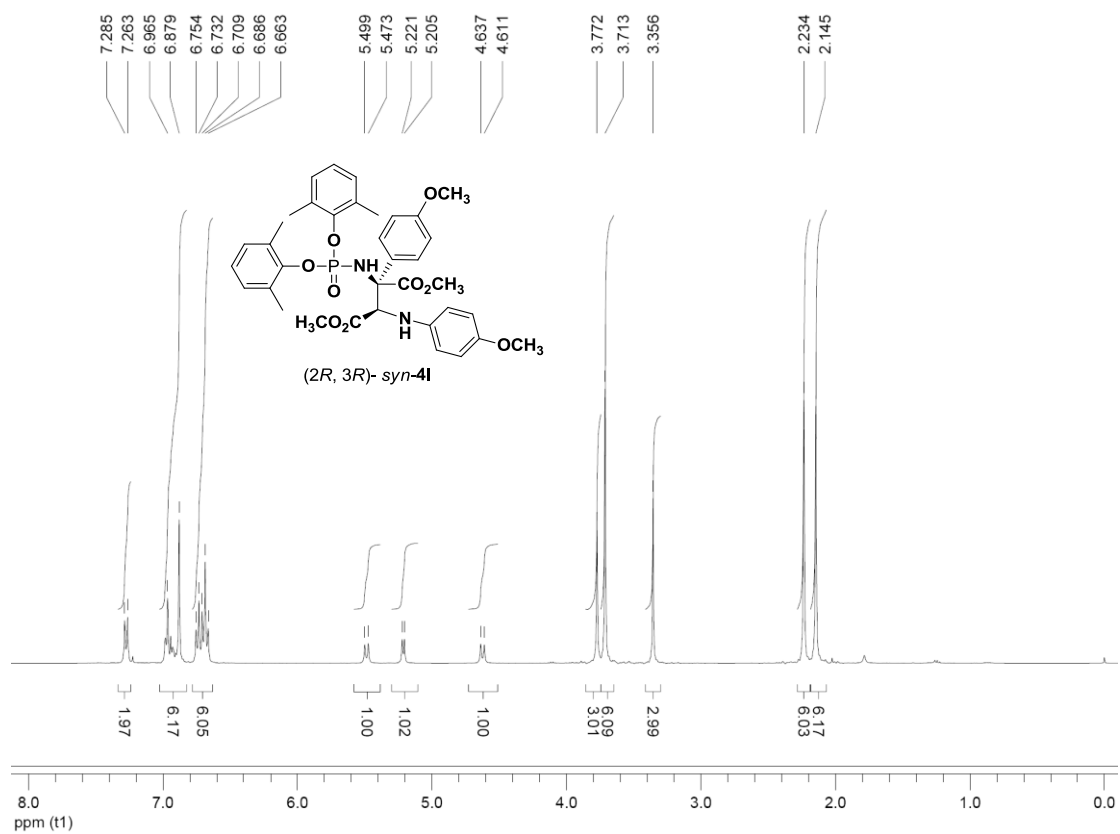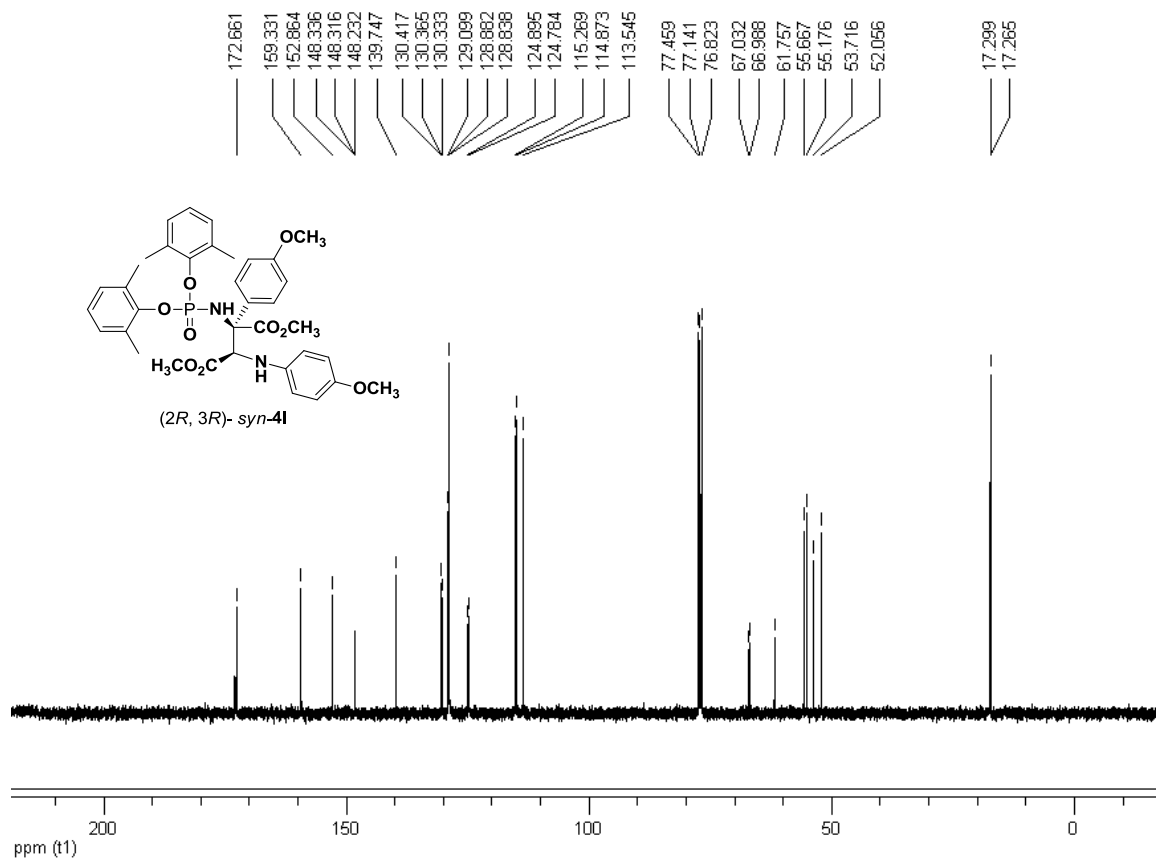

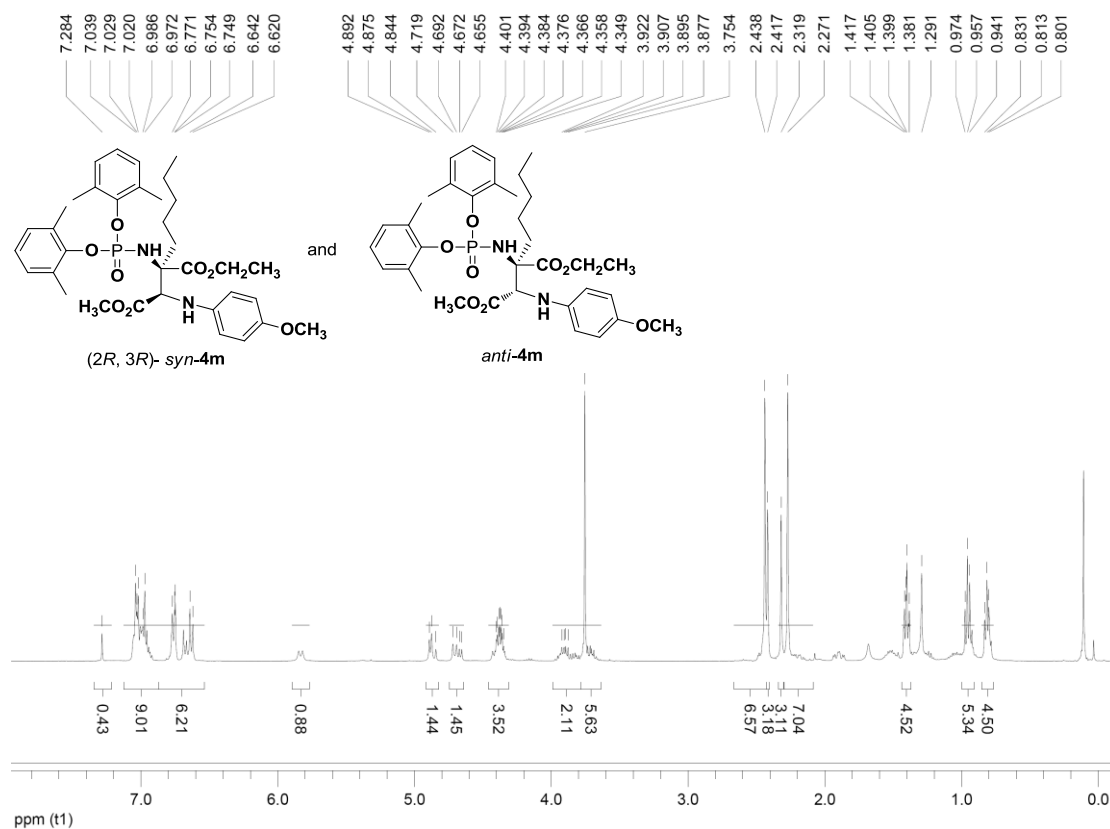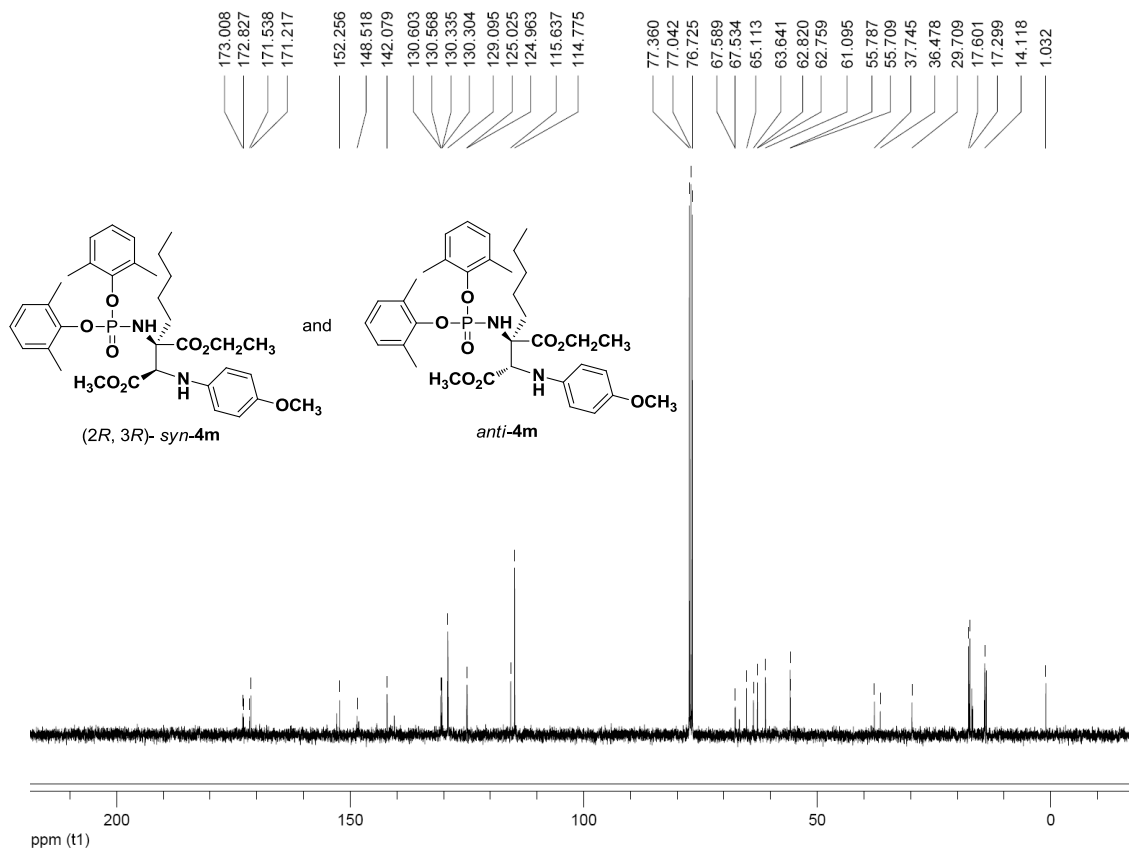



### Representative $^{31}\text{P}$ NMR spectra for new compounds

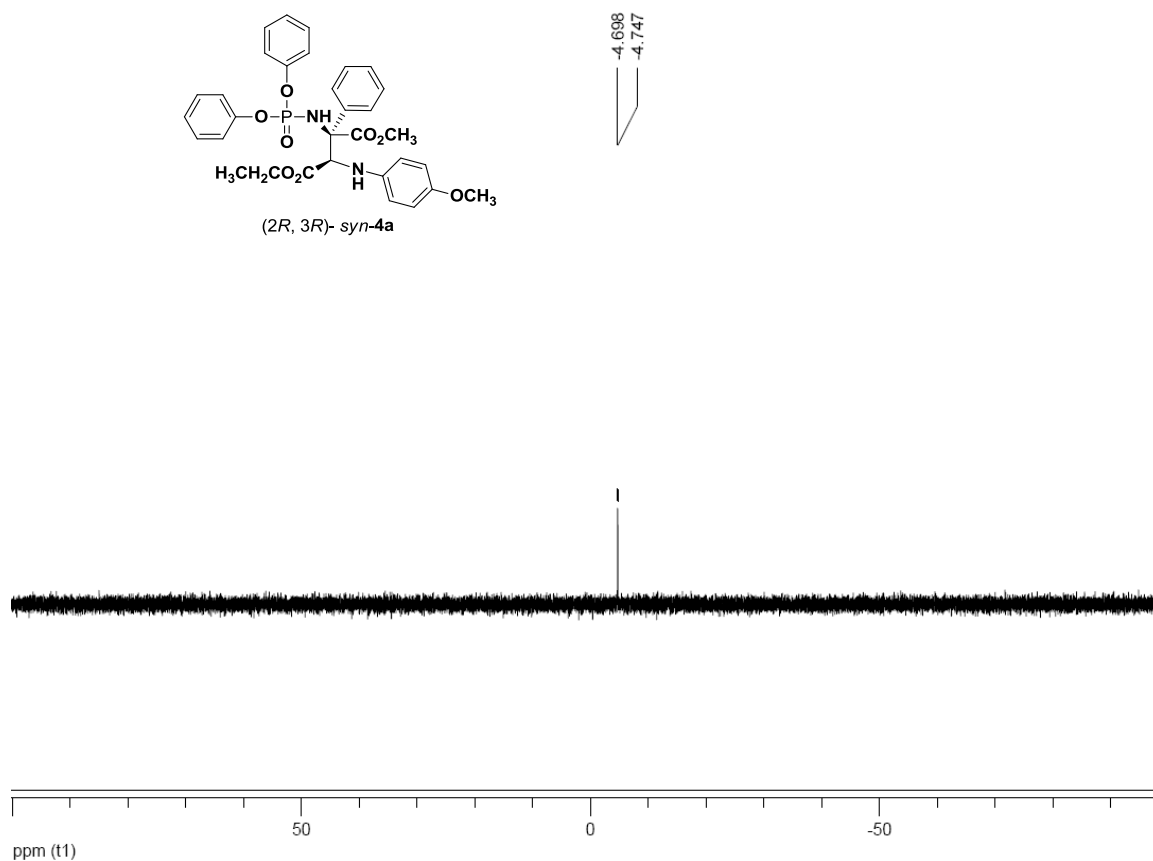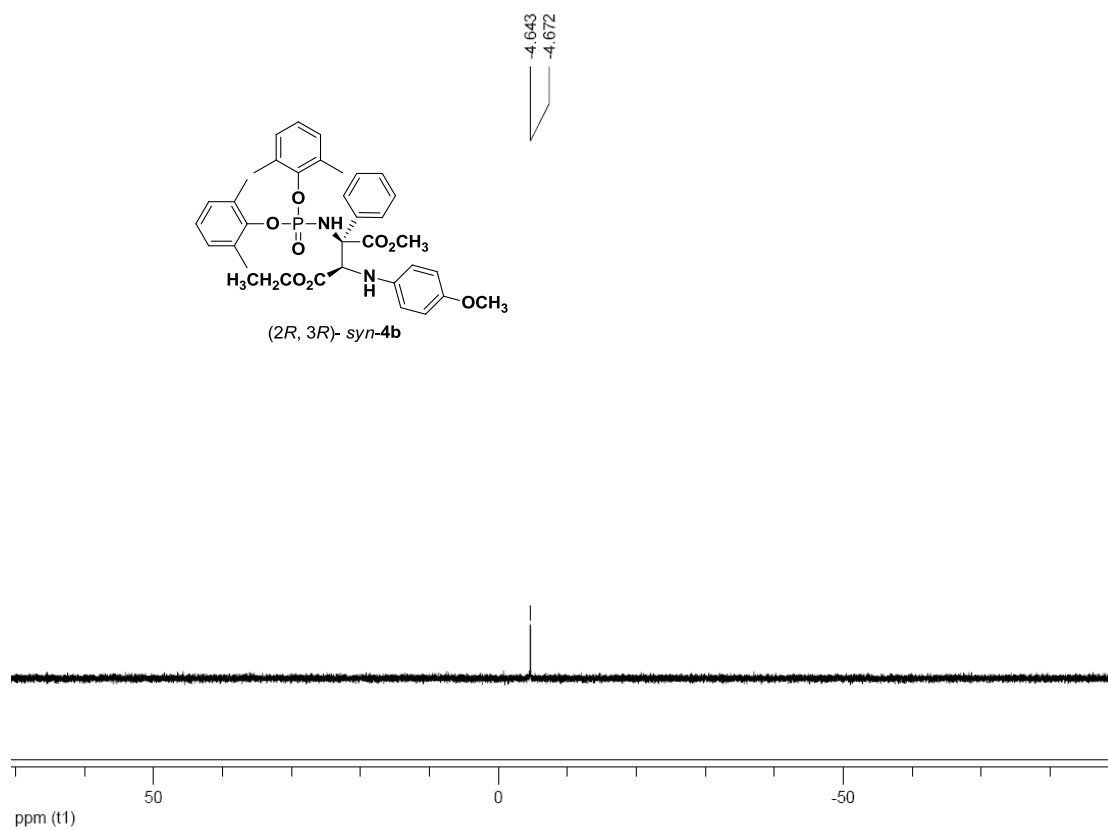

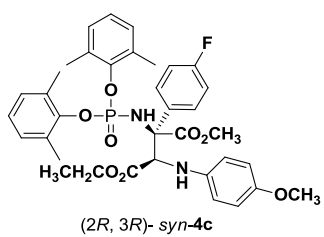

-5.118  
-5.153

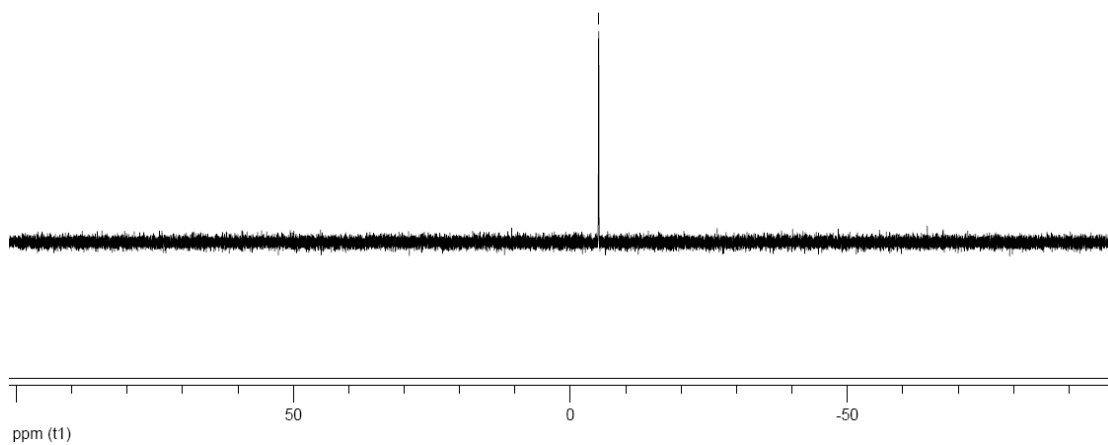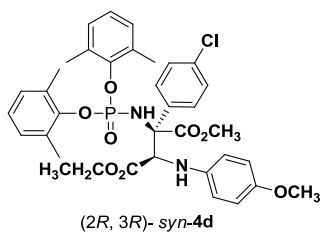

-6.100  
-6.139

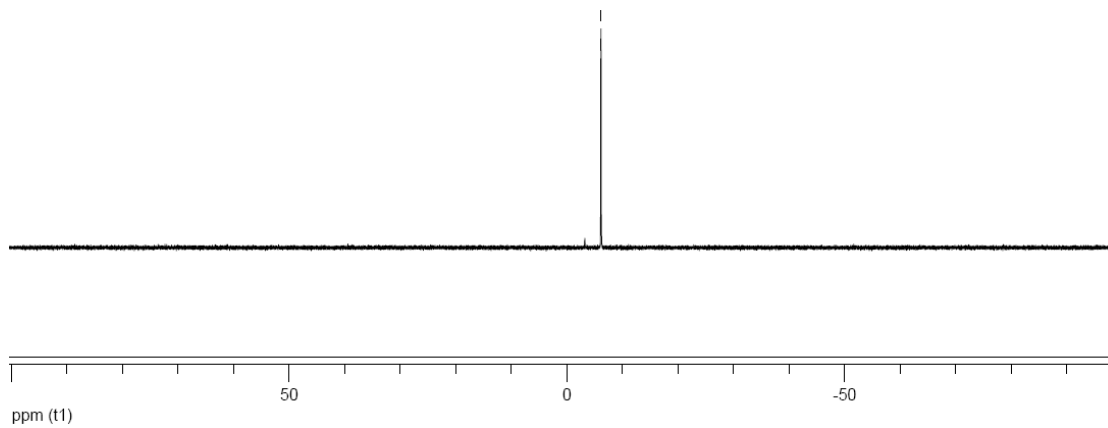

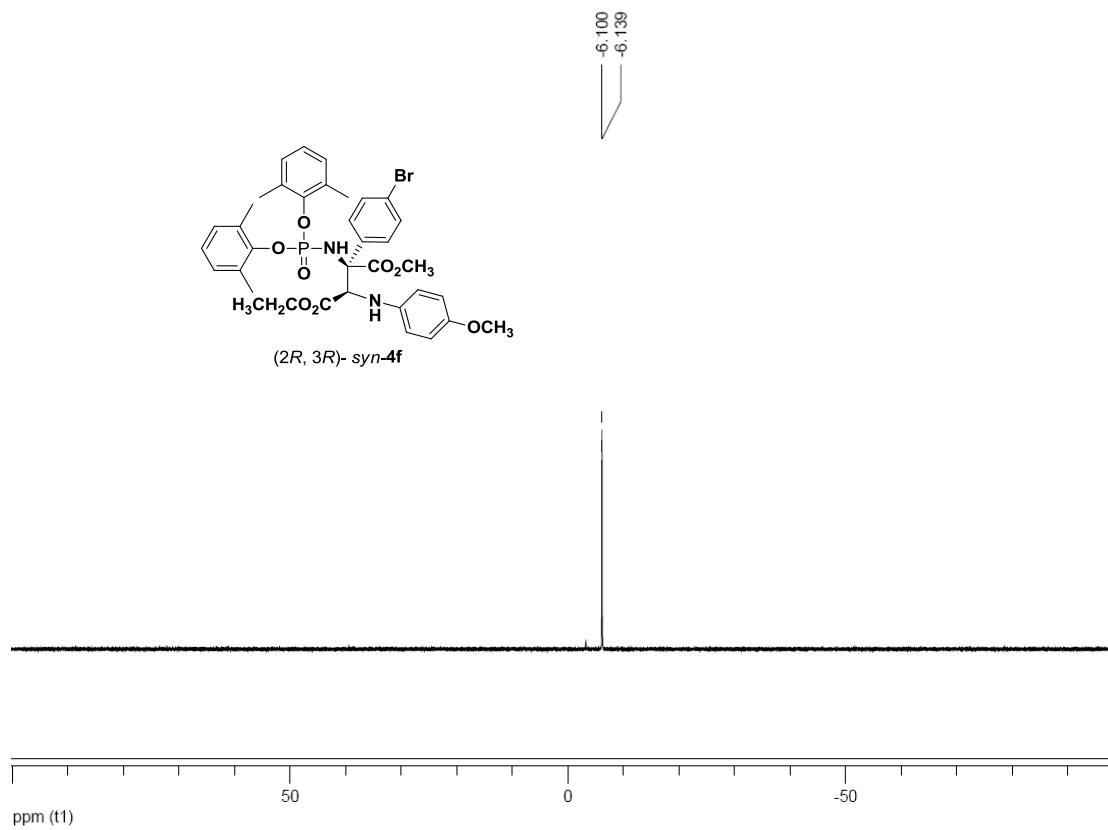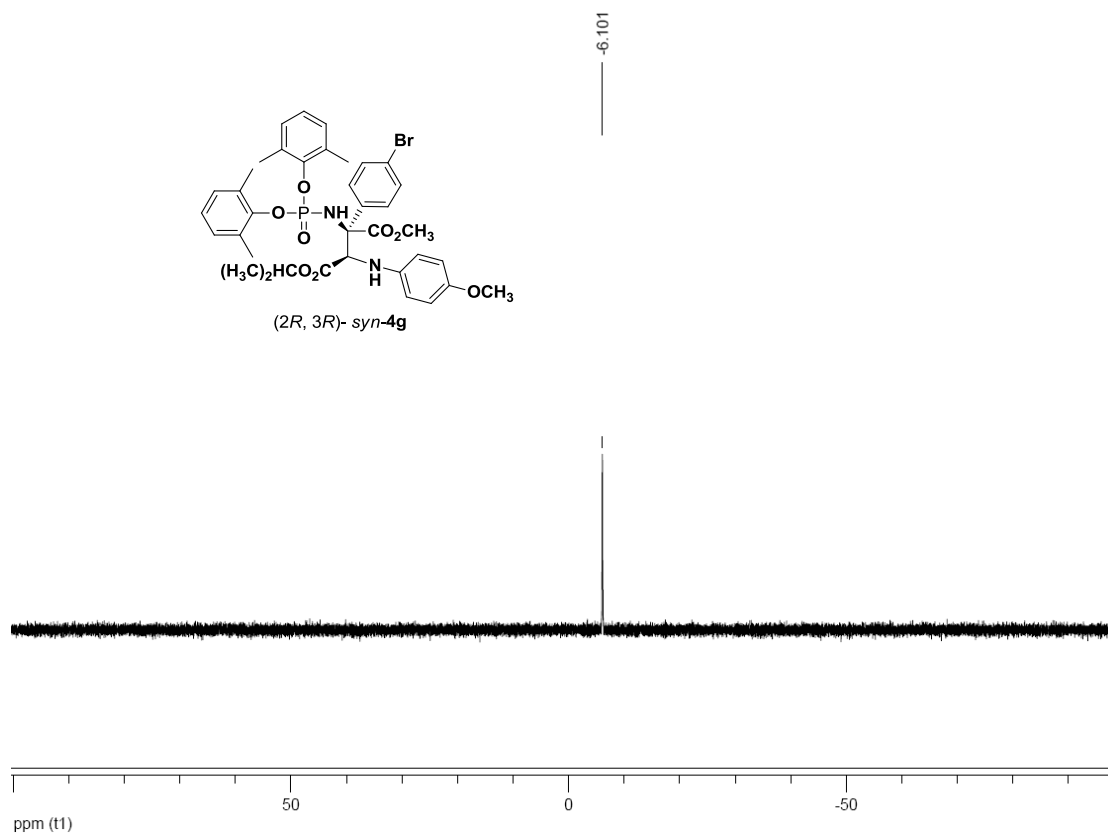

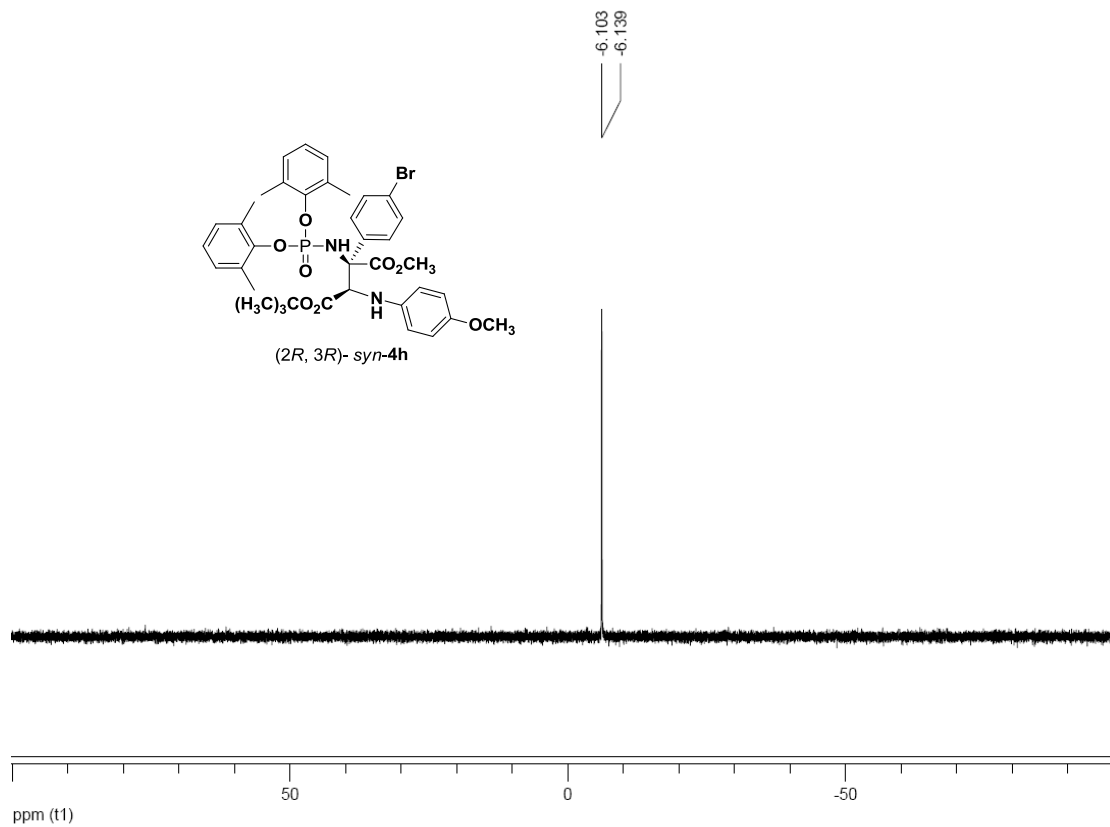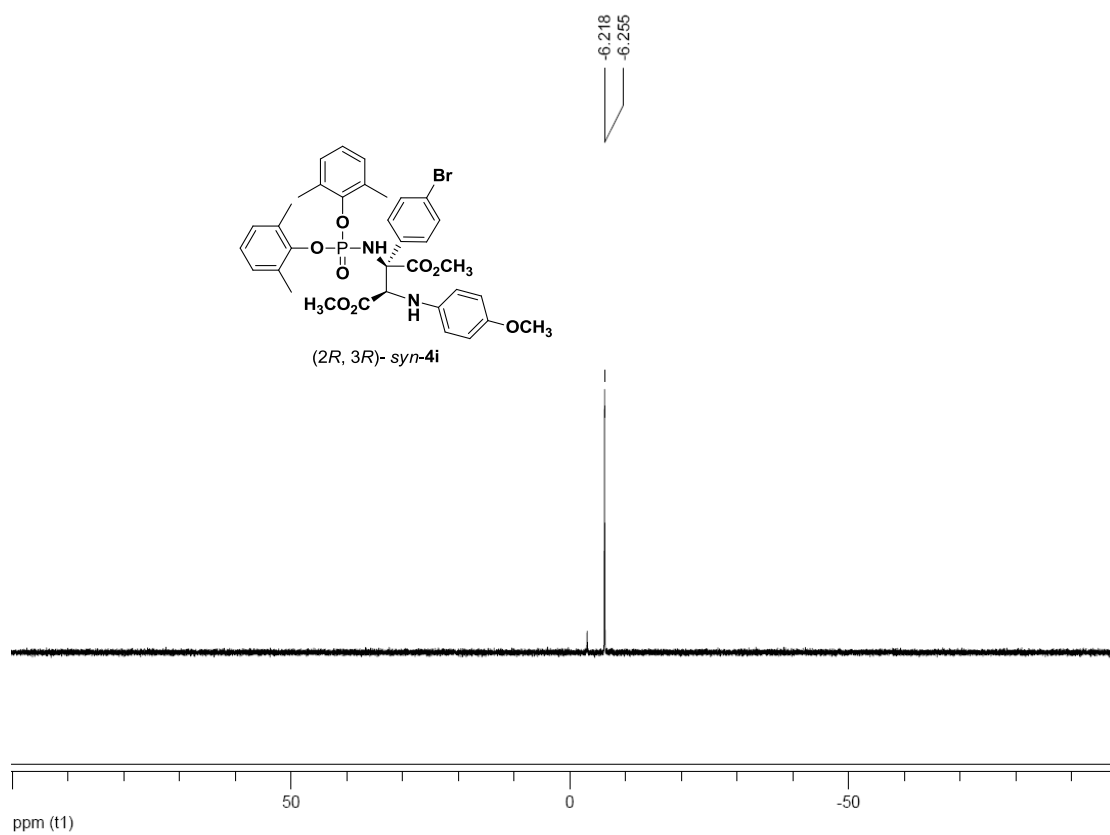

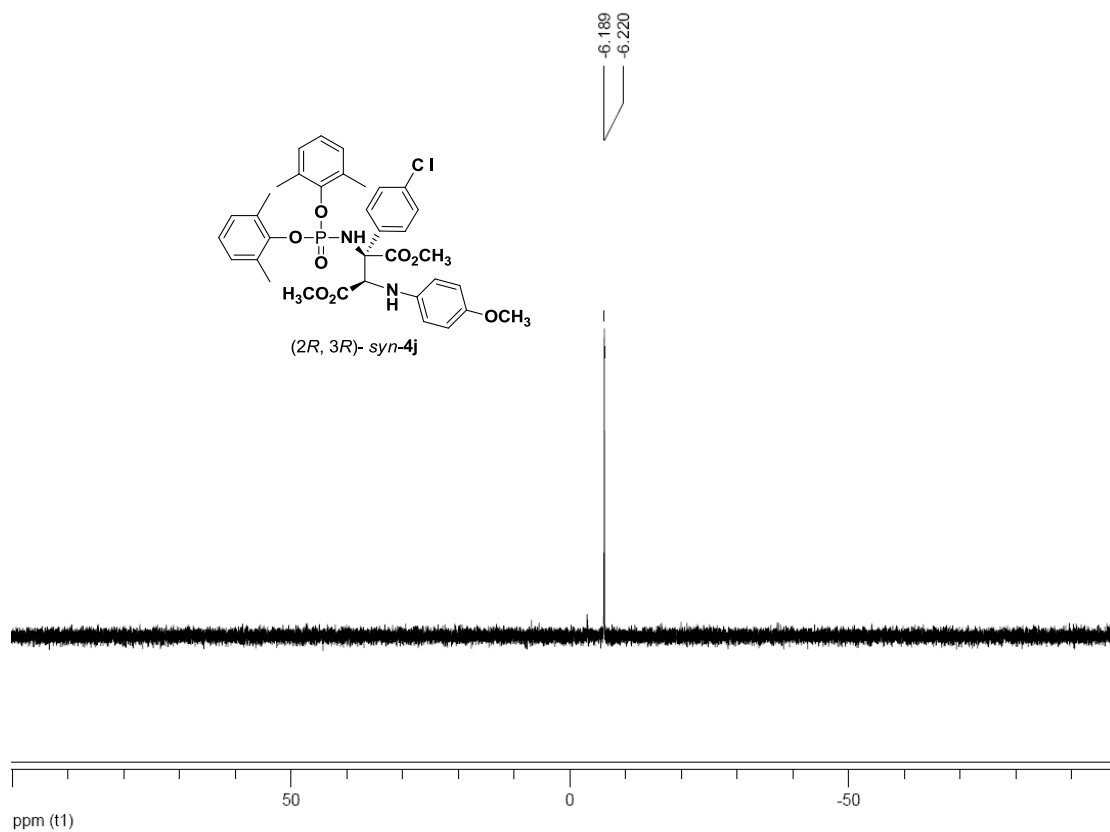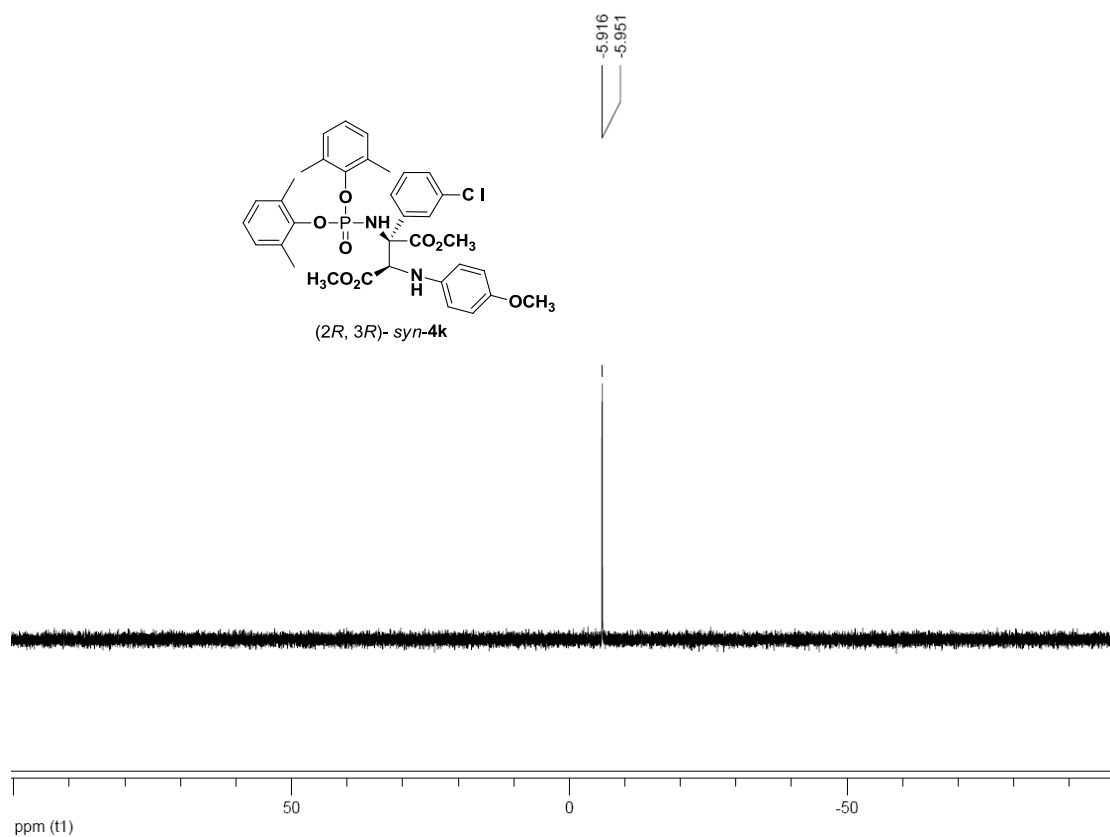

### HPLC spectra of compounds

Chiralpak Column: AD-H  
 M.P: *n*-Hex/*i*-PrOH=70:30  
 UV: 254nm  
 1.0 ml/min  
 Injection Volume: 20µl

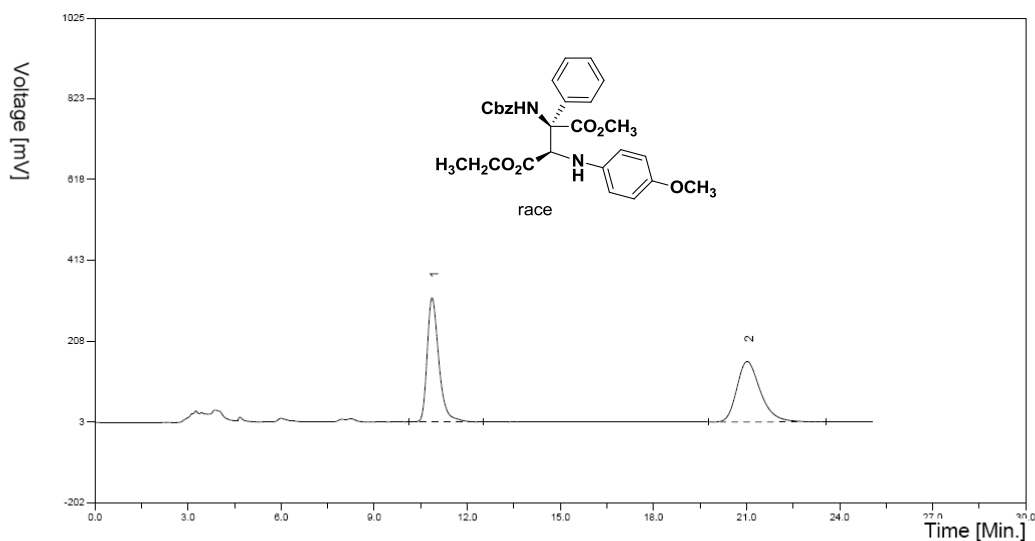

组分表

| #  | 组分名     | 保留时间(min) | 峰高(mv) | 峰面积(mv.sec) | 面积百分比(%) |
|----|---------|-----------|--------|-------------|----------|
| 1  | Unknown | 10.86     | 314.63 | 8256.14     | 50.4579  |
| 2  | Unknown | 21.02     | 153.22 | 8106.29     | 49.5421  |
| 合计 |         |           | 467.85 | 16362.43    | 100      |

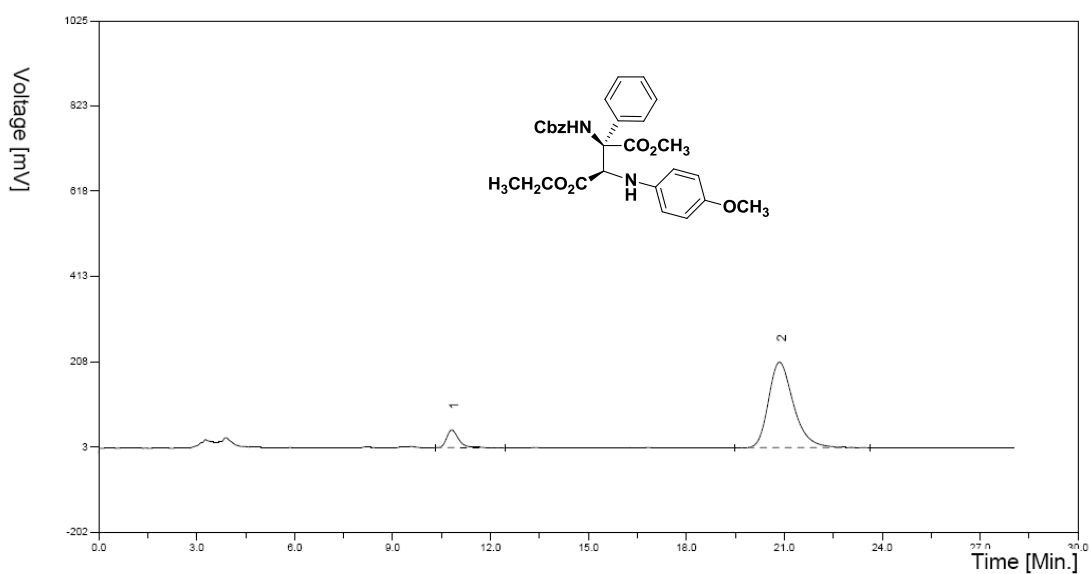

组分表

| #  | 组分名     | 保留时间(min) | 峰高(mv) | 峰面积(mv.sec) | 面积百分比(%) |
|----|---------|-----------|--------|-------------|----------|
| 1  | Unknown | 10.81     | 42.45  | 1106.67     | 9.1951   |
| 2  | Unknown | 20.85     | 205.30 | 10928.68    | 90.8049  |
| 合计 |         |           | 247.75 | 12035.34    | 100      |

Chiralpak Column: AD-H  
 M.P: *n*-Hex/*i*-PrOH/MeOH=80:10:5  
 UV: 254nm  
 0.5 ml/min  
 Injection Volume: 20µl

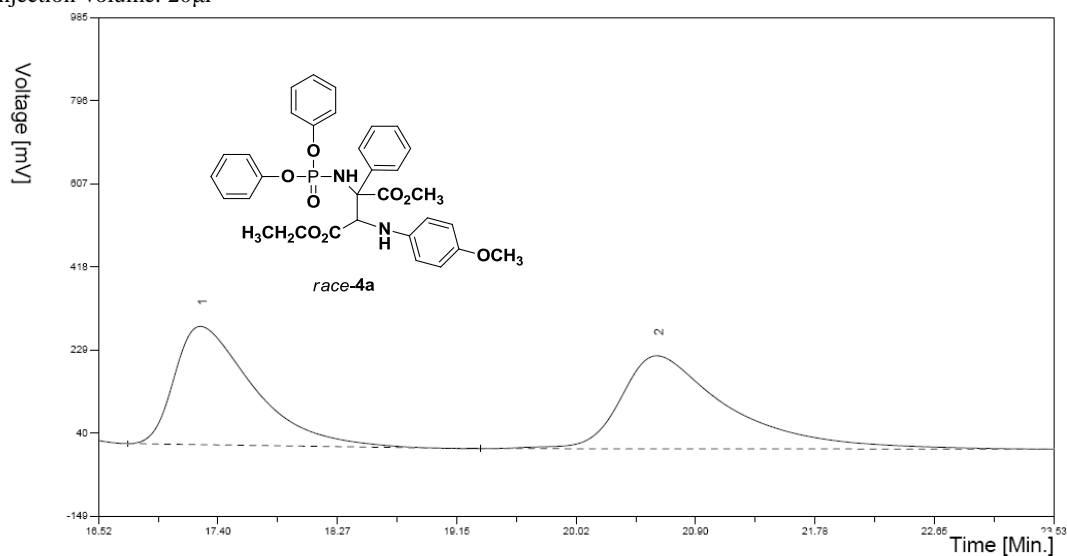

组分表

| # | 组分名     | 保留时间(min) | 峰高(mv) | 峰面积(mv.sec) | 面积百分比(%) |
|---|---------|-----------|--------|-------------|----------|
| 1 | Unknown | 17.27     | 267.63 | 10254.97    | 48.7958  |
| 2 | Unknown | 20.62     | 206.74 | 10761.12    | 51.2042  |

合计

474.37 21016.09 100

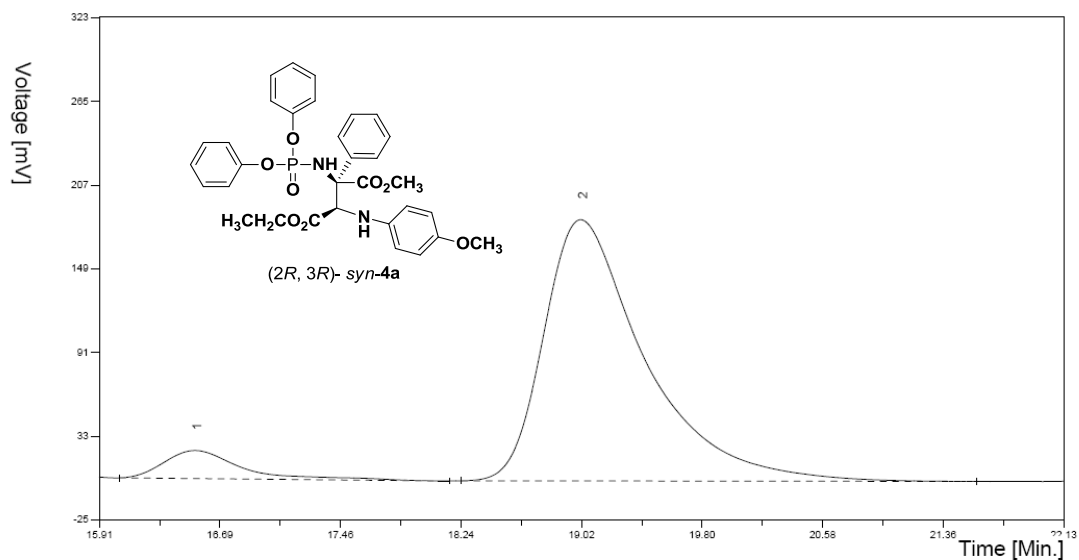

组分表

| # | 组分名     | 保留时间(min) | 峰高(mv) | 峰面积(mv.sec) | 面积百分比(%) |
|---|---------|-----------|--------|-------------|----------|
| 1 | Unknown | 16.52     | 19.41  | 667.92      | 7.5343   |
| 2 | Unknown | 19.02     | 180.99 | 8197.15     | 92.4657  |

合计

200.40 8865.08 100

Chiralpak Column: AD-H  
 M.P: *n*-Hex/*i*-PrOH=15:1  
 UV: 254nm  
 1.0 ml/min  
 Injection Volume: 20µl

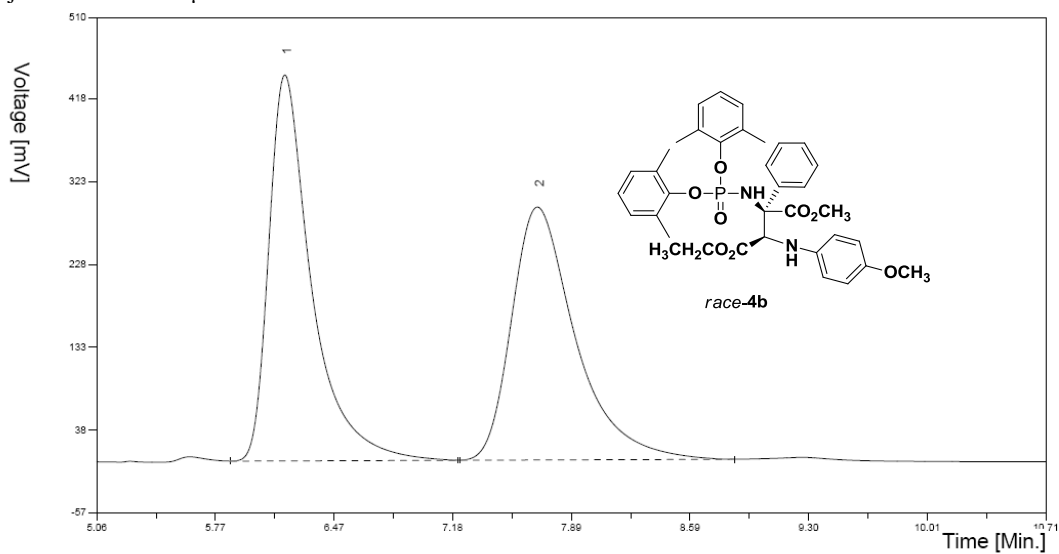

组分表

| # | 组分名     | 保留时间(min) | 峰高(mv) | 峰面积(mv.sec) | 面积百分比(%) |
|---|---------|-----------|--------|-------------|----------|
| 1 | Unknown | 6.18      | 442.47 | 7824.72     | 50.5479  |
| 2 | Unknown | 7.69      | 290.01 | 7855.08     | 49.4521  |

合计

732.48 15479.80 100

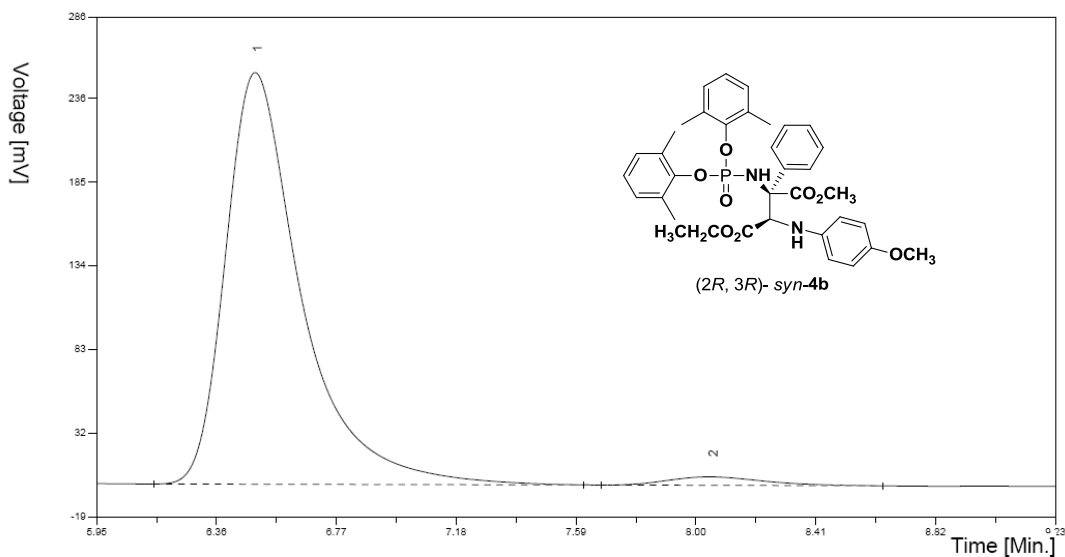

组分表

| # | 组分名     | 保留时间(min) | 峰高(mv) | 峰面积(mv.sec) | 面积百分比(%) |
|---|---------|-----------|--------|-------------|----------|
| 1 | Unknown | 6.49      | 250.62 | 4525.93     | 97.5203  |
| 2 | Unknown | 8.05      | 5.16   | 115.09      | 2.4797   |

合计

255.77 4641.01 100



Chiralpak Column: AD-H  
 M.P: *n*-Hex/*i*-PrOH=10:1  
 UV: 254nm  
 1.0 ml/min  
 Injection Volume: 20µl

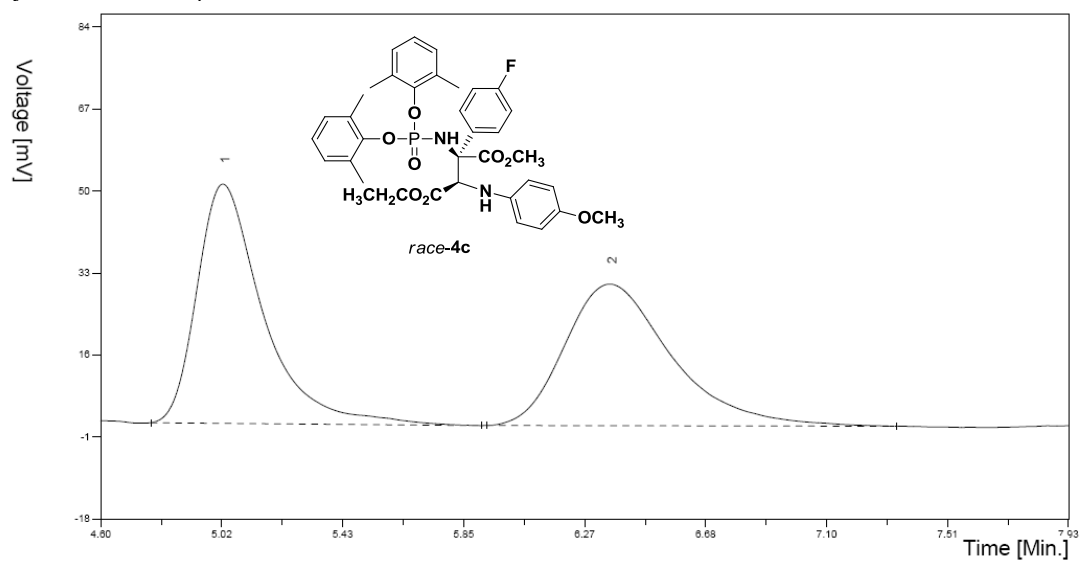

组分表

| # | 组分名     | 保留时间(min) | 峰高(mv) | 峰面积(mv.sec) | 面积百分比(%) |
|---|---------|-----------|--------|-------------|----------|
| 1 | Unknown | 5.02      | 49.57  | 783.30      | 51.1789  |
| 2 | Unknown | 6.35      | 29.34  | 747.21      | 48.8211  |

合计

78.92 1530.51 100

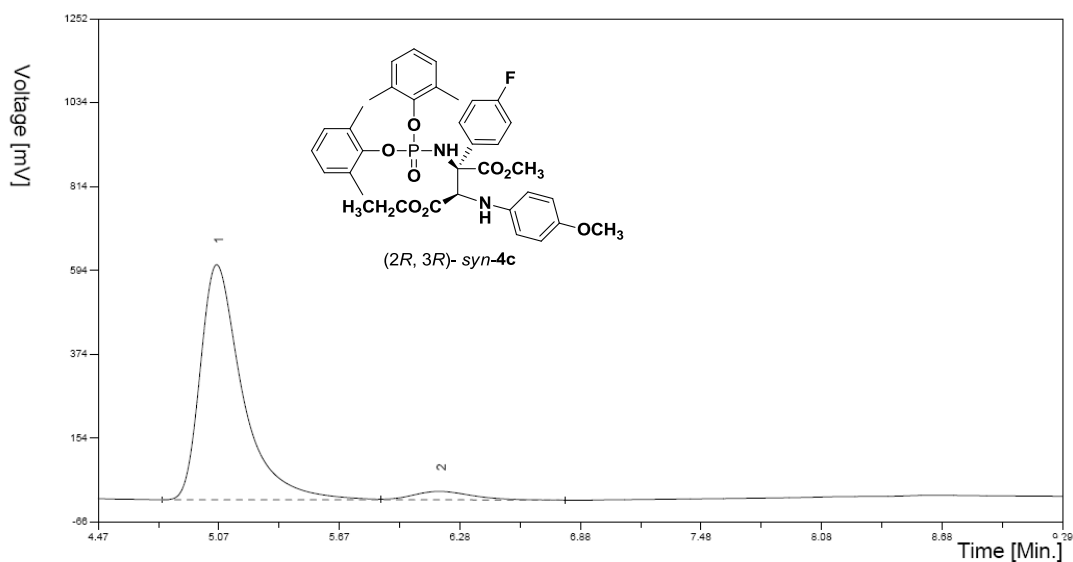

组分表

| # | 组分名     | 保留时间(min) | 峰高(mv) | 峰面积(mv.sec) | 面积百分比(%) |
|---|---------|-----------|--------|-------------|----------|
| 1 | Unknown | 5.06      | 616.28 | 9017.85     | 95.2450  |
| 2 | Unknown | 6.17      | 22.40  | 450.21      | 4.7550   |

合计

638.68 9468.06 100

Chiralpak Column: IA  
 M.P: *n*-Hex/*i*-PrOH=15:1  
 UV: 254nm  
 1.0 ml/min  
 Injection Volume: 20µl

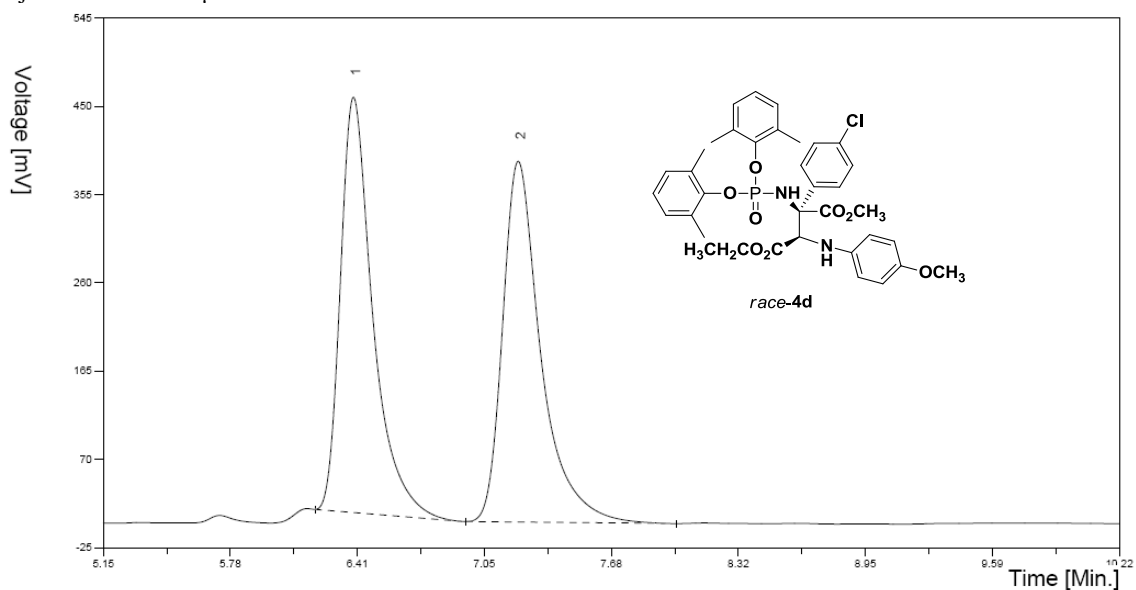

组分表

| #  | 组分名     | 保留时间(min) | 峰高(mv) | 峰面积(mv.sec) | 面积百分比(%) |
|----|---------|-----------|--------|-------------|----------|
| 1  | Unknown | 6.39      | 444.88 | 4876.44     | 49.7090  |
| 2  | Unknown | 7.22      | 383.00 | 4933.54     | 50.2910  |
| 合计 |         |           | 827.88 | 9809.99     | 100      |

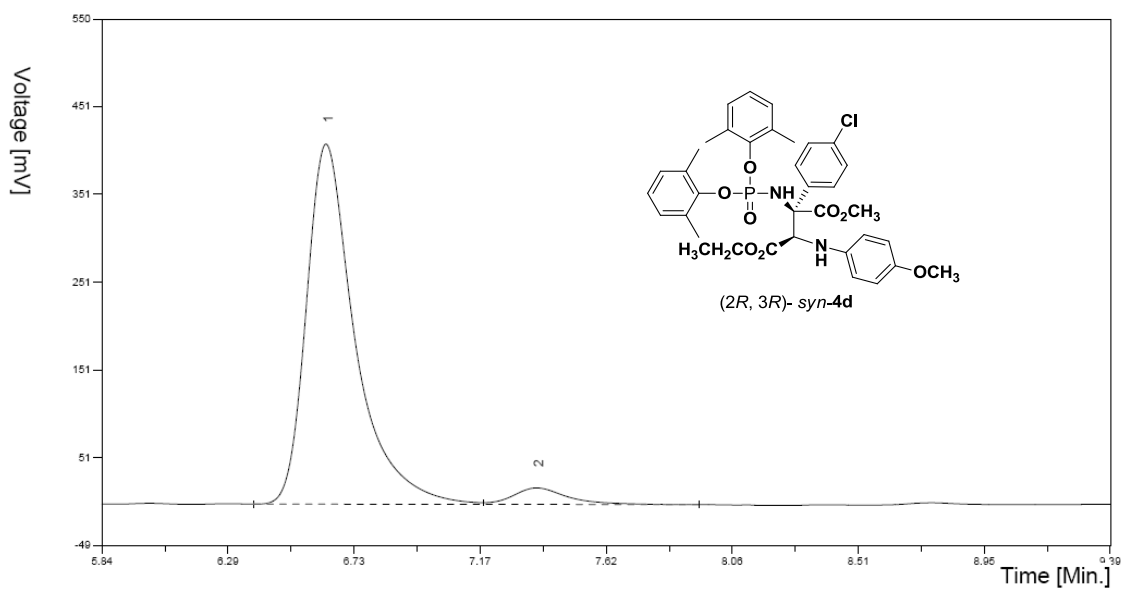

组分表

| #  | 组分名     | 保留时间(min) | 峰高(mv) | 峰面积(mv.sec) | 面积百分比(%) |
|----|---------|-----------|--------|-------------|----------|
| 1  | Unknown | 6.63      | 410.13 | 4882.33     | 95.1096  |
| 2  | Unknown | 7.37      | 18.77  | 251.04      | 4.8904   |
| 合计 |         |           | 428.90 | 5133.37     | 100      |

Chiralpak Column: AD-H  
 M.P: *n*-Hex/*i*-PrOH=30:1  
 UV: 254nm  
 1.0 ml/min  
 Injection Volume: 20µl

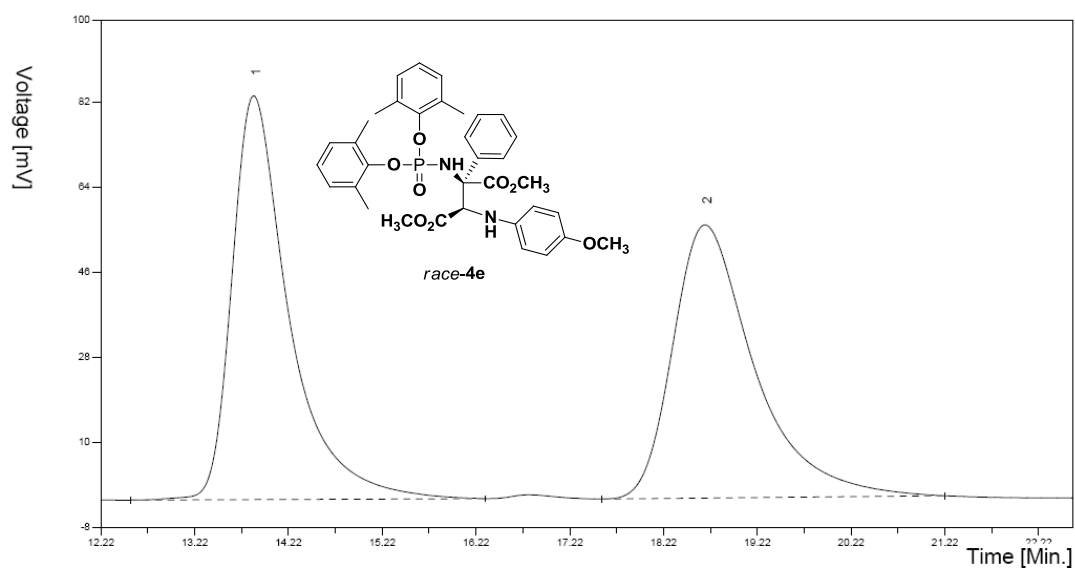

组分表

| #  | 组分名     | 保留时间(min) | 峰高(mv) | 峰面积(mv.sec) | 面积百分比(%) |
|----|---------|-----------|--------|-------------|----------|
| 1  | Unknown | 13.85     | 85.35  | 3614.40     | 50.8745  |
| 2  | Unknown | 18.66     | 57.75  | 3490.14     | 49.1255  |
| 合计 |         |           | 143.10 | 7104.54     | 100      |

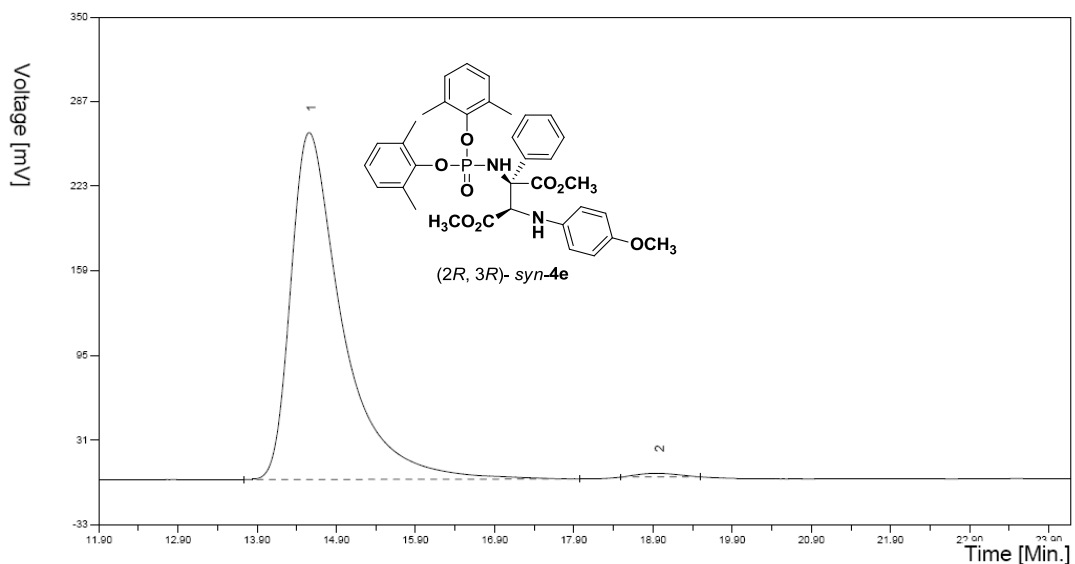

组分表

| #  | 组分名     | 保留时间(min) | 峰高(mv) | 峰面积(mv.sec) | 面积百分比(%) |
|----|---------|-----------|--------|-------------|----------|
| 1  | Unknown | 14.56     | 262.03 | 11885.62    | 99.1931  |
| 2  | Unknown | 18.96     | 2.71   | 96.68       | 0.8069   |
| 合计 |         |           | 264.74 | 11982.31    | 100      |

Chiralpak Column: IA  
 M.P: *n*-Hex/*i*-PrOH=10:1  
 UV: 254nm  
 1.0 ml/min  
 Injection Volume: 20µl

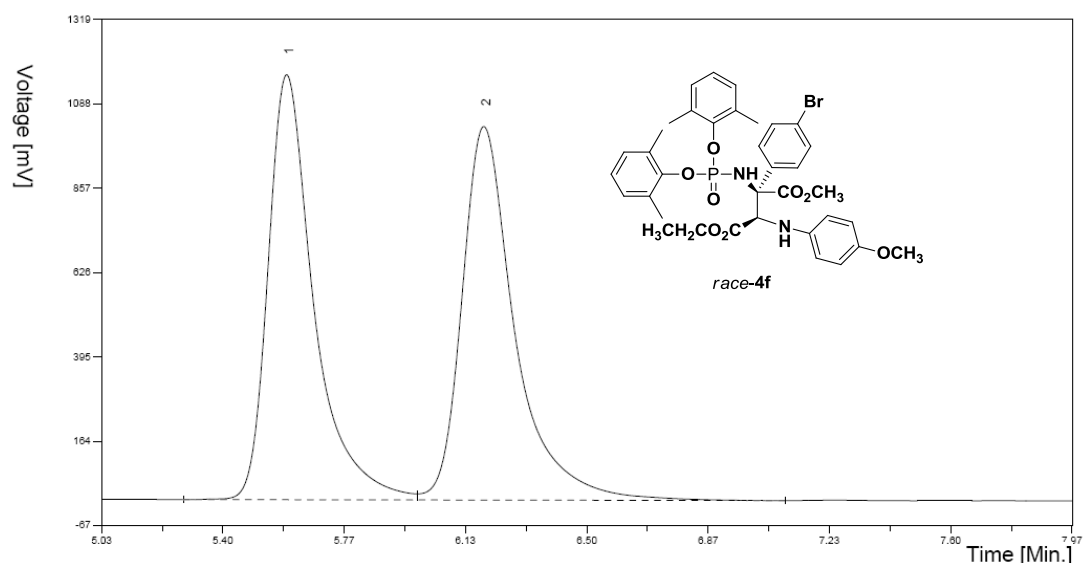

组分表

| #  | 组分名     | 保留时间(min) | 峰高(mv)  | 峰面积(mv.sec) | 面积百分比(%) |
|----|---------|-----------|---------|-------------|----------|
| 1  | Unknown | 5.59      | 1163.88 | 11190.90    | 49.5337  |
| 2  | Unknown | 6.19      | 1023.00 | 11401.58    | 50.4663  |
| 合计 |         |           | 2186.88 | 22592.47    | 100      |

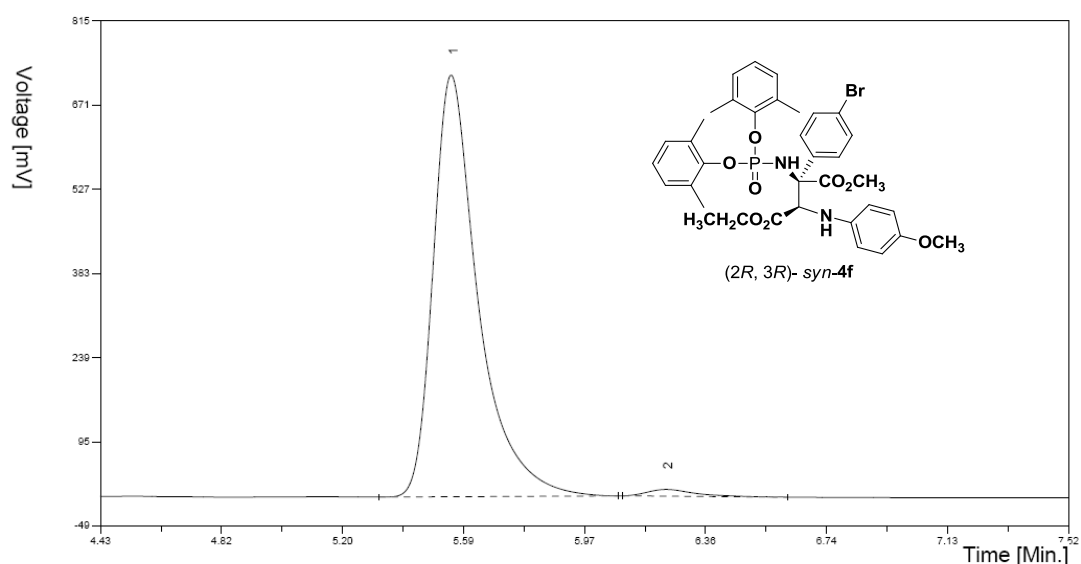

组分表

| #  | 组分名     | 保留时间(min) | 峰高(mv) | 峰面积(mv.sec) | 面积百分比(%) |
|----|---------|-----------|--------|-------------|----------|
| 1  | Unknown | 5.55      | 721.13 | 7199.58     | 98.3333  |
| 2  | Unknown | 6.23      | 11.40  | 122.03      | 1.6667   |
| 合计 |         |           | 732.53 | 7321.61     | 100      |

Chiralpak Column:IA  
 M.P: *n*-Hex/*i*-PrOH=15:1  
 UV: 254nm  
 1.0 ml/min  
 Injection Volume: 20µl

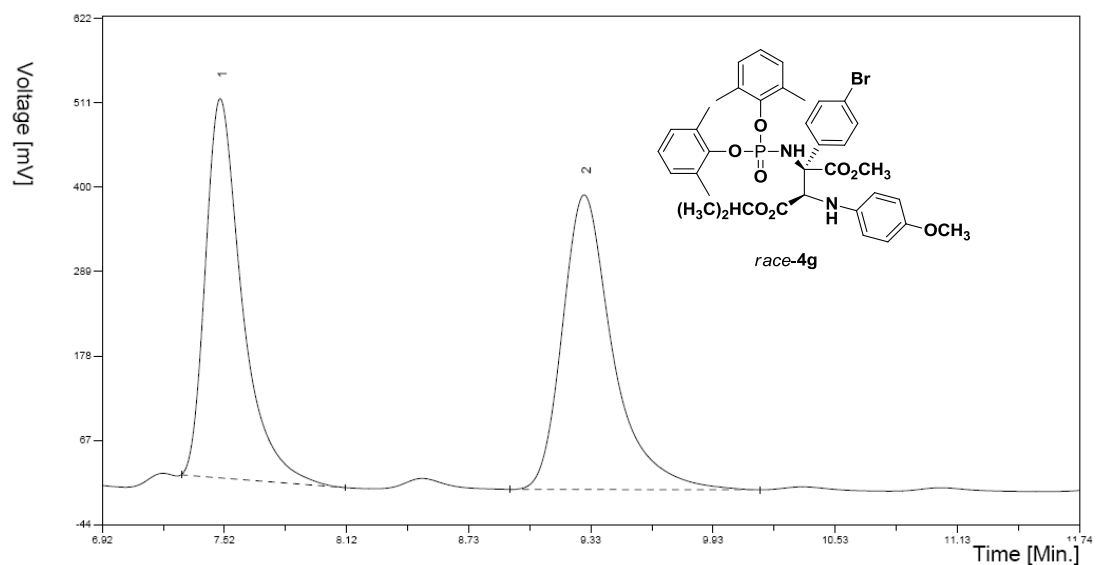

组分表

| #  | 组分名     | 保留时间(min) | 峰高(mv) | 峰面积(mv.sec) | 面积百分比(%) |
|----|---------|-----------|--------|-------------|----------|
| 1  | Unknown | 7.50      | 498.73 | 6240.39     | 48.1782  |
| 2  | Unknown | 9.30      | 387.49 | 6712.34     | 51.8218  |
| 合计 |         |           | 886.22 | 12952.73    | 100      |

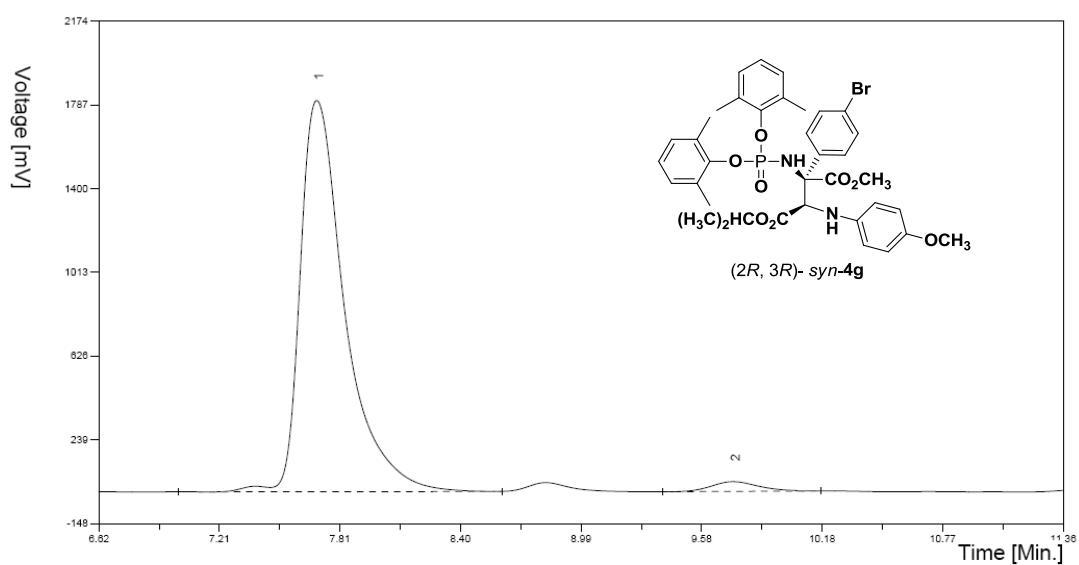

组分表

| #  | 组分名     | 保留时间(min) | 峰高(mv)  | 峰面积(mv.sec) | 面积百分比(%) |
|----|---------|-----------|---------|-------------|----------|
| 1  | Unknown | 7.69      | 1806.29 | 27457.25    | 97.4150  |
| 2  | Unknown | 9.74      | 45.18   | 728.60      | 2.5850   |
| 合计 |         |           | 1851.47 | 28185.85    | 100      |

Chiralpak Column:IA  
 M.P: *n*-Hex/*i*-PrOH=15:1  
 UV: 254nm  
 1.0 ml/min  
 Injection Volume: 20µl

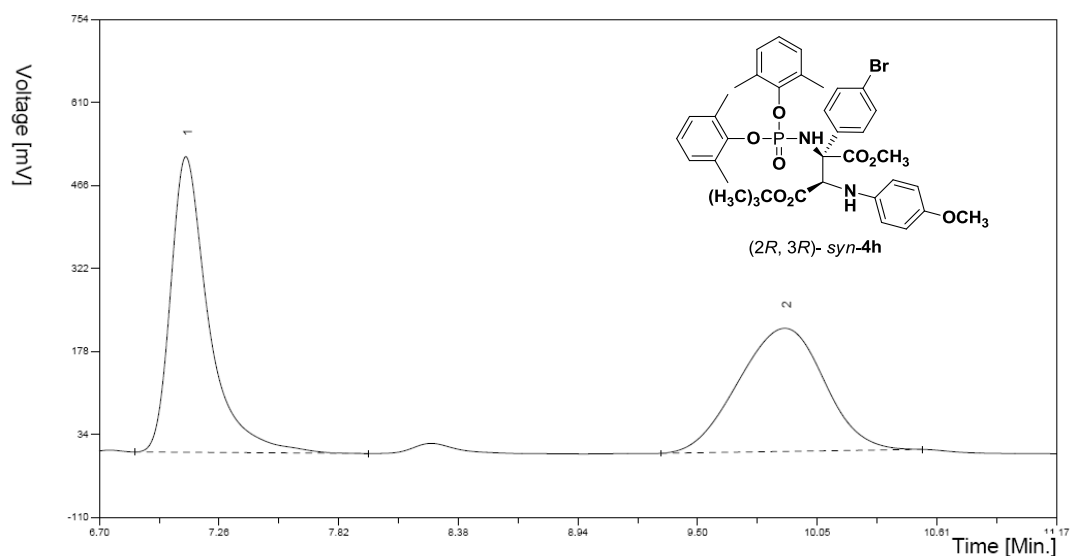

组分表

| #  | 组分名     | 保留时间(min) | 峰高(mv) | 峰面积(mv.sec) | 面积百分比(%) |
|----|---------|-----------|--------|-------------|----------|
| 1  | Unknown | 7.11      | 512.70 | 6317.23     | 51.4247  |
| 2  | Unknown | 9.90      | 213.56 | 5967.21     | 48.5753  |
| 合计 |         |           | 726.27 | 12284.43    | 100      |

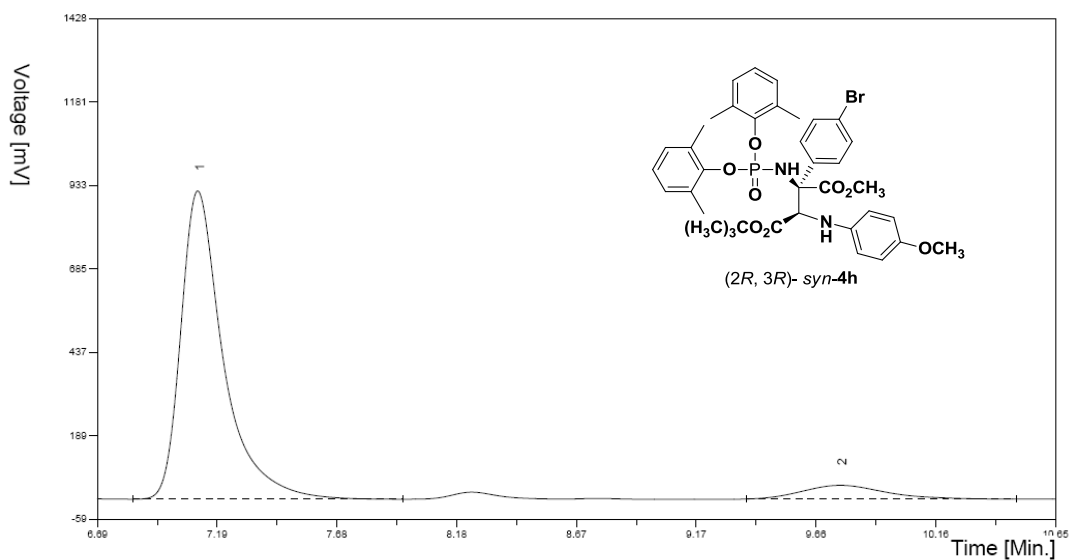

组分表

| #  | 组分名     | 保留时间(min) | 峰高(mv) | 峰面积(mv.sec) | 面积百分比(%) |
|----|---------|-----------|--------|-------------|----------|
| 1  | Unknown | 7.11      | 915.37 | 11144.16    | 92.1224  |
| 2  | Unknown | 9.76      | 40.39  | 952.96      | 7.8776   |
| 合计 |         |           | 955.77 | 12097.12    | 100      |

Chiralpak Column:IA  
 M.P: *n*-Hex/*i*-PrOH=30:1  
 UV: 254nm  
 1.0 ml/min  
 Injection Volume: 20µl

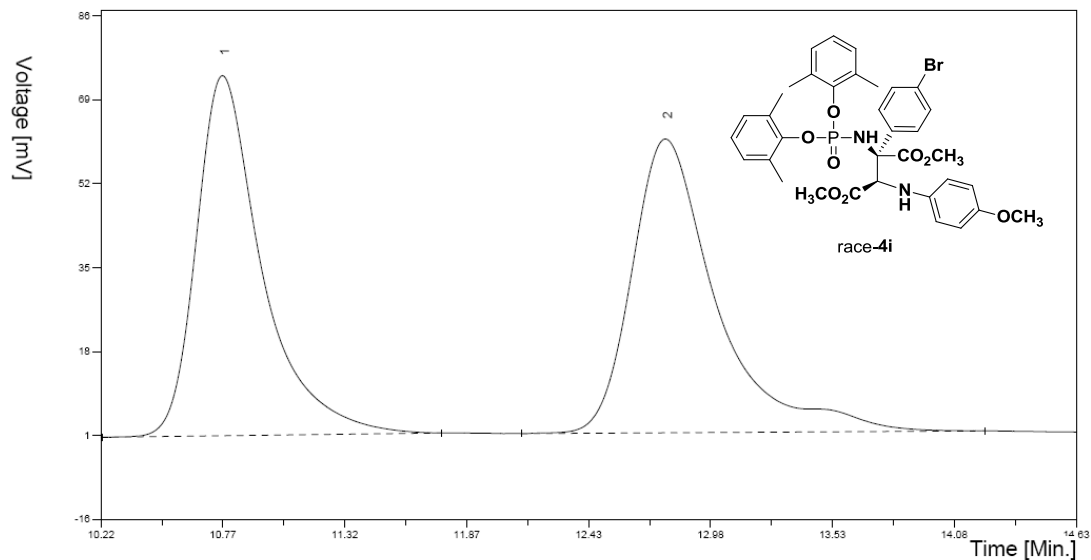

组分表

| # | 组分名     | 保留时间(min) | 峰高(mv) | 峰面积(mv.sec) | 面积百分比(%) |
|---|---------|-----------|--------|-------------|----------|
| 1 | Unknown | 10.77     | 72.89  | 1498.89     | 48.6340  |
| 2 | Unknown | 12.77     | 59.48  | 1583.09     | 51.3660  |

合计 132.37 3081.98 100

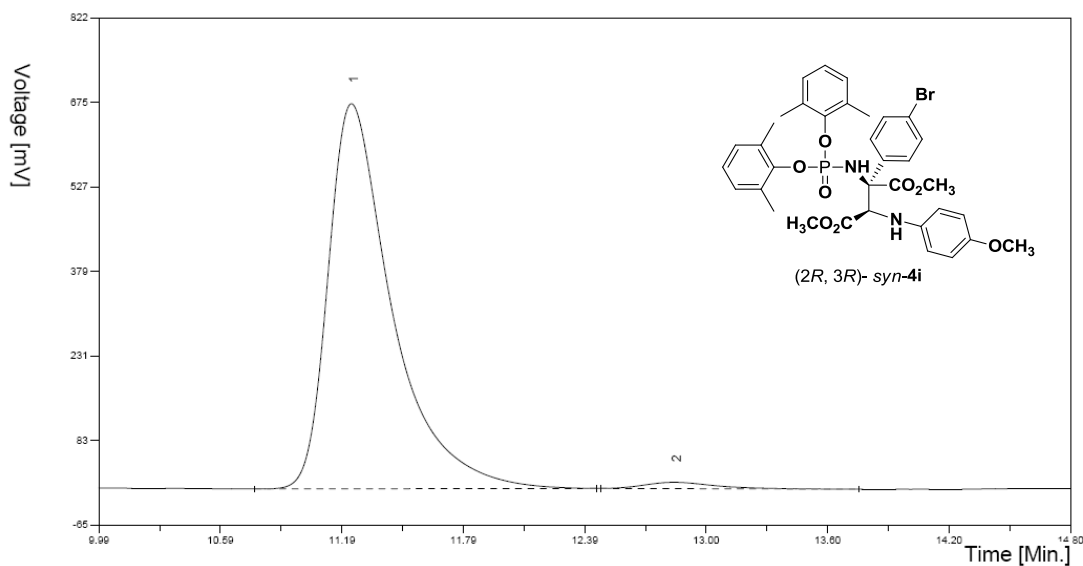

组分表

| # | 组分名     | 保留时间(min) | 峰高(mv) | 峰面积(mv.sec) | 面积百分比(%) |
|---|---------|-----------|--------|-------------|----------|
| 1 | Unknown | 11.19     | 673.78 | 14801.49    | 98.2217  |
| 2 | Unknown | 12.84     | 11.05  | 267.98      | 1.7783   |

合计 684.83 15069.47 100

Chiralpak Column:IA  
 M.P: *n*-Hex/*i*-PrOH=40:1  
 UV: 254nm  
 1.0 ml/min  
 Injection Volume: 20µl

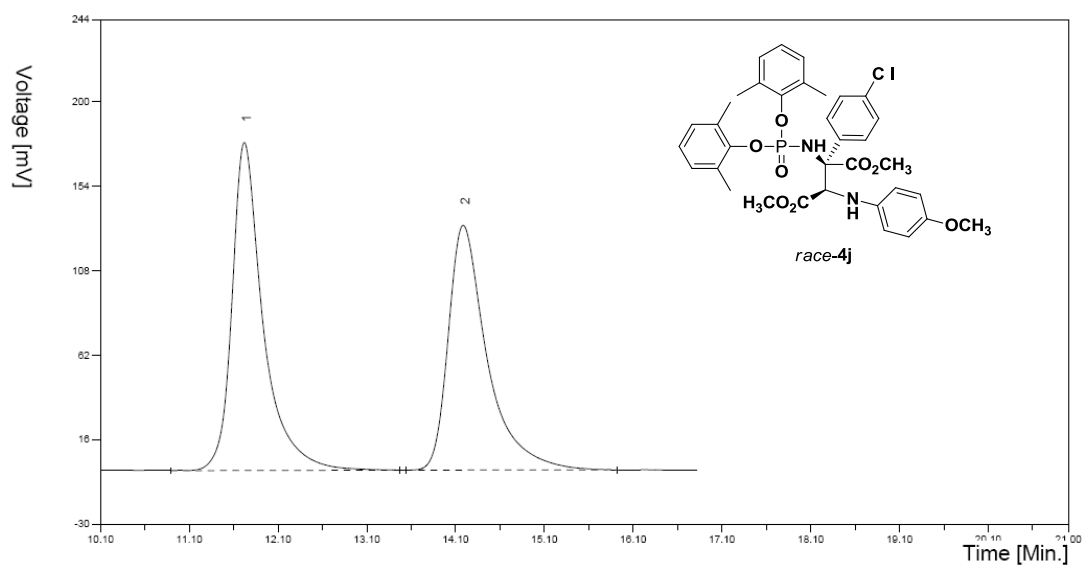

组分表

| #  | 组分名     | 保留时间(min) | 峰高(mv) | 峰面积(mv.sec) | 面积百分比(%) |
|----|---------|-----------|--------|-------------|----------|
| 1  | Unknown | 11.72     | 178.52 | 4352.56     | 51.8177  |
| 2  | Unknown | 14.18     | 133.19 | 4047.19     | 48.1823  |
| 合计 |         |           | 311.71 | 8399.75     | 100      |

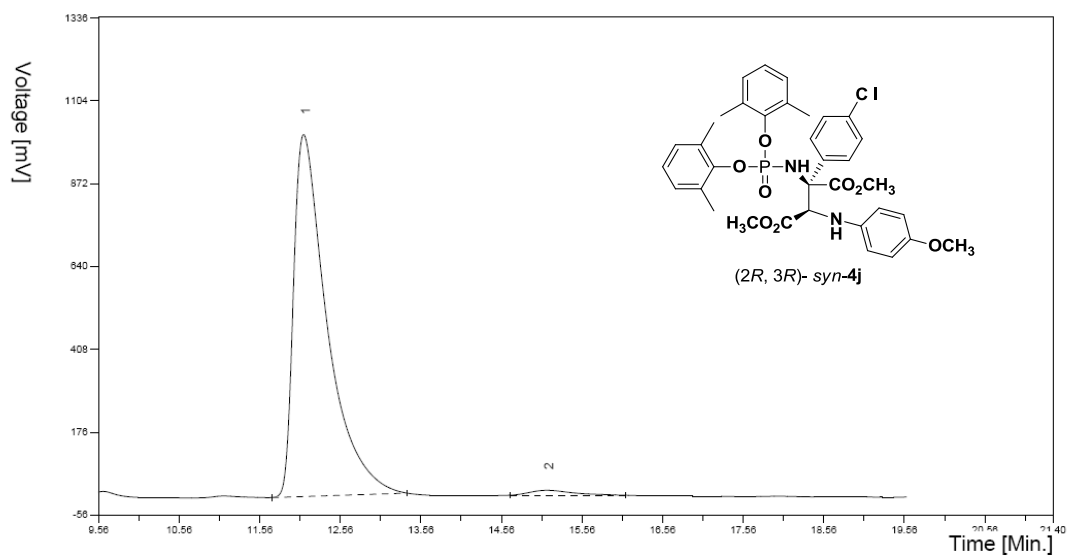

组分表

| #  | 组分名     | 保留时间(min) | 峰高(mv)  | 峰面积(mv.sec) | 面积百分比(%) |
|----|---------|-----------|---------|-------------|----------|
| 1  | Unknown | 12.10     | 1013.36 | 29198.24    | 98.2392  |
| 2  | Unknown | 15.12     | 13.78   | 523.35      | 1.7608   |
| 合计 |         |           | 1027.14 | 29721.59    | 100      |



Chiralpak Column:AD-H  
 M.P: *n*-Hex/*i*-PrOH=30:1  
 UV: 254nm  
 1.0 ml/min  
 Injection Volume: 20µl

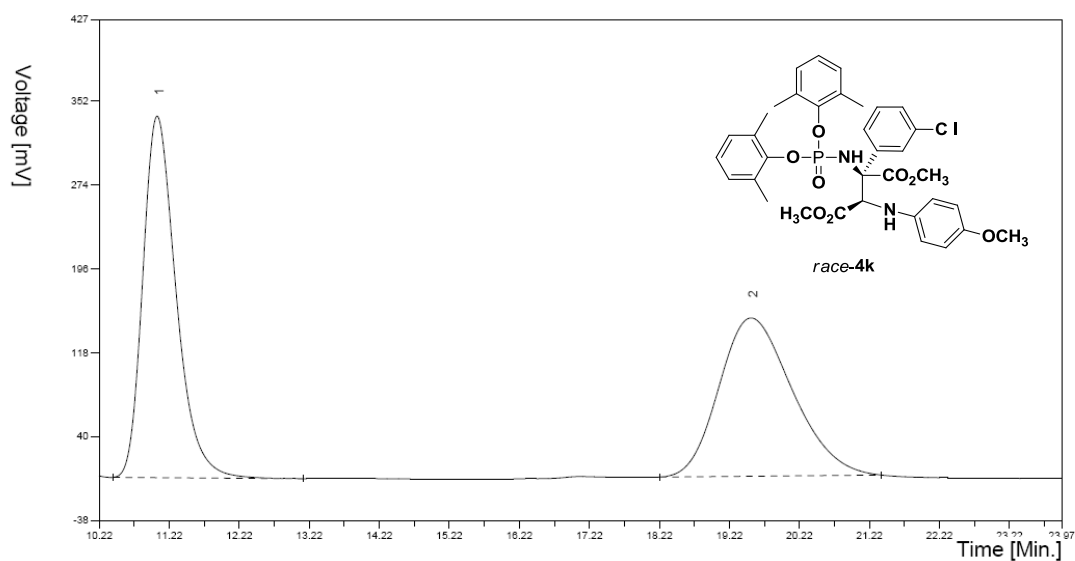

组分表

| #  | 组分名     | 保留时间(min) | 峰高(mv) | 峰面积(mv.sec) | 面积百分比(%) |
|----|---------|-----------|--------|-------------|----------|
| 1  | Unknown | 11.05     | 335.92 | 11092.90    | 50.9303  |
| 2  | Unknown | 19.53     | 147.09 | 10687.64    | 49.0697  |
| 合计 |         |           | 483.01 | 21780.54    | 100      |

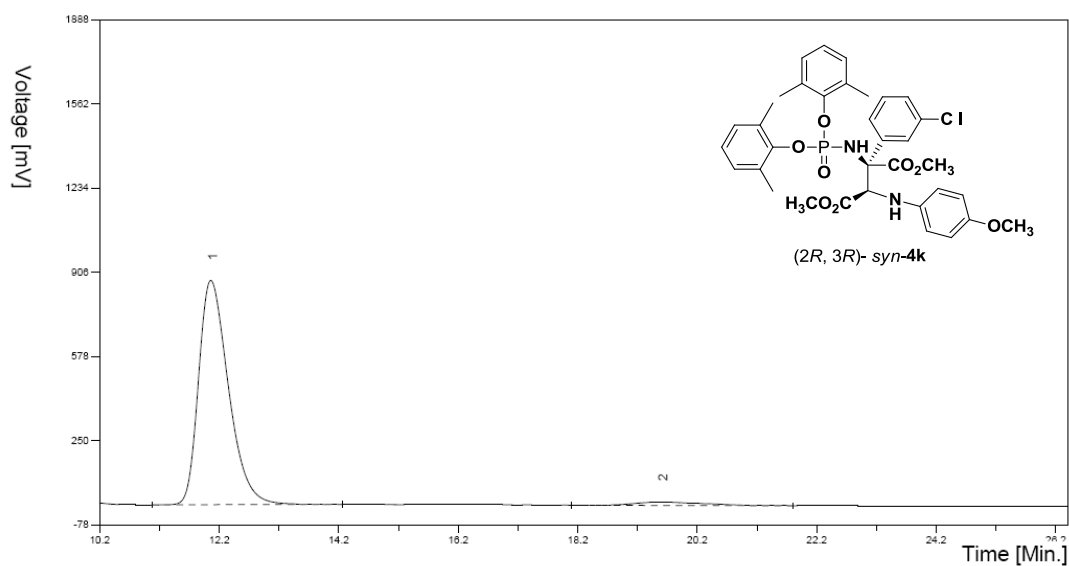

组分表

| #  | 组分名     | 保留时间(min) | 峰高(mv) | 峰面积(mv.sec) | 面积百分比(%) |
|----|---------|-----------|--------|-------------|----------|
| 1  | Unknown | 12.08     | 873.03 | 30319.90    | 96.6175  |
| 2  | Unknown | 19.61     | 13.39  | 1061.47     | 3.3825   |
| 合计 |         |           | 886.43 | 31381.37    | 100      |

Chiralpak Column: IA  
 M.P: *n*-Hex/*i*-PrOH=20:1  
 UV: 254nm  
 1.0 ml/min  
 Injection Volume: 20µl

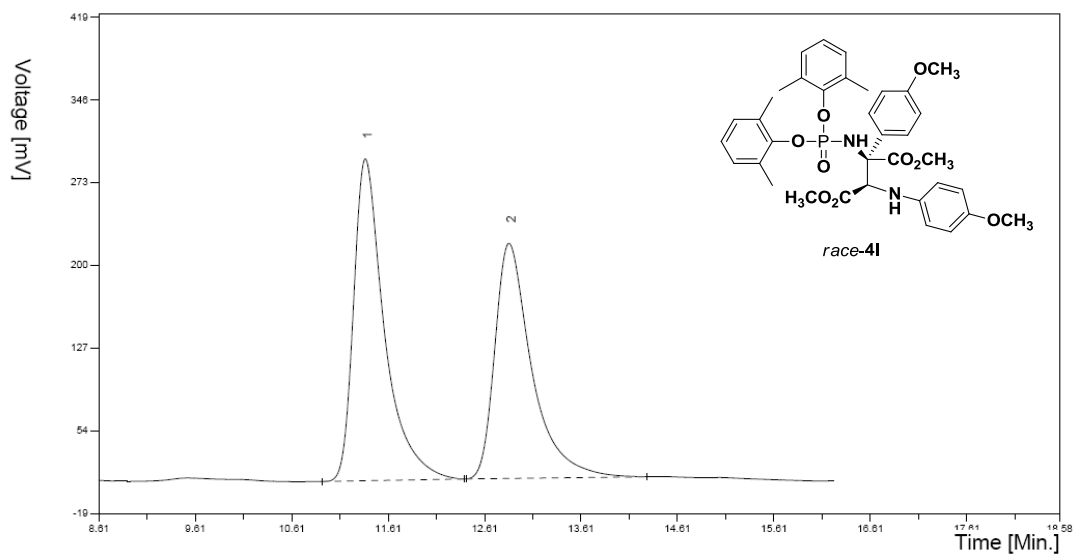

组分表

| #  | 组分名     | 保留时间(min) | 峰高(mv) | 峰面积(mv.sec) | 面积百分比(%) |
|----|---------|-----------|--------|-------------|----------|
| 1  | Unknown | 11.38     | 283.83 | 6293.74     | 53.3346  |
| 2  | Unknown | 12.87     | 207.31 | 5506.74     | 46.6654  |
| 合计 |         |           | 491.14 | 11800.49    | 100      |

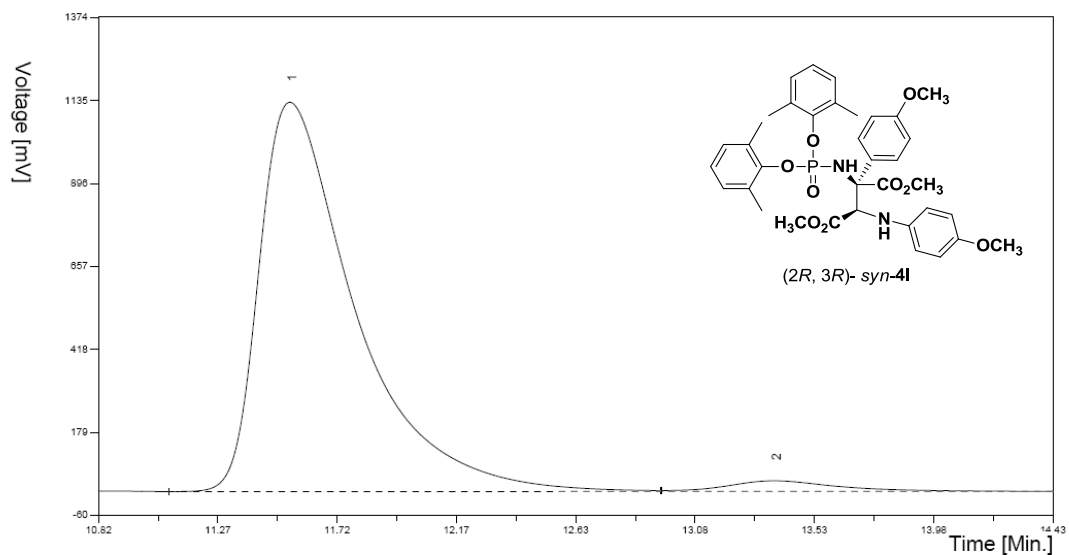

组分表

| #  | 组分名     | 保留时间(min) | 峰高(mv)  | 峰面积(mv.sec) | 面积百分比(%) |
|----|---------|-----------|---------|-------------|----------|
| 1  | Unknown | 11.55     | 1121.45 | 28281.51    | 96.9596  |
| 2  | Unknown | 13.38     | 30.55   | 886.83      | 3.0404   |
| 合计 |         |           | 1152.00 | 29168.34    | 100      |

Chiralpak Column:IA  
 M.P: *n*-Hex/*i*-PrOH=50:1  
 UV: 254nm  
 1.0 ml/min  
 Injection Volume: 20µl

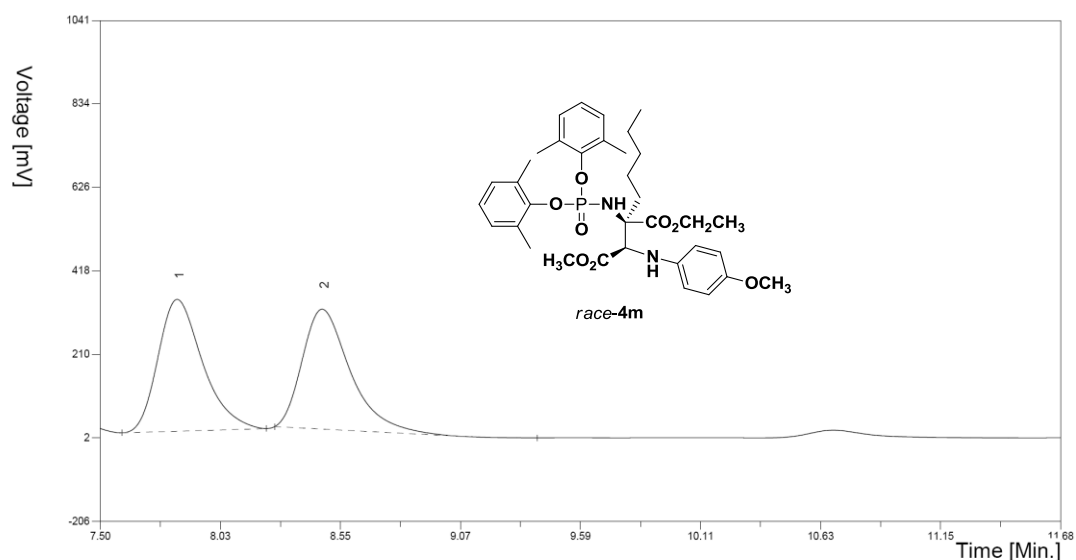

组分表

| #  | 组分名     | 保留时间(min) | 峰高(mv) | 峰面积(mv.sec) | 面积百分比(%) |
|----|---------|-----------|--------|-------------|----------|
| 1  | Unknown | 7.84      | 327.86 | 4412.10     | 51.3673  |
| 2  | Unknown | 8.47      | 297.24 | 4177.22     | 48.6327  |
| 合计 |         |           | 625.10 | 8589.32     | 100      |

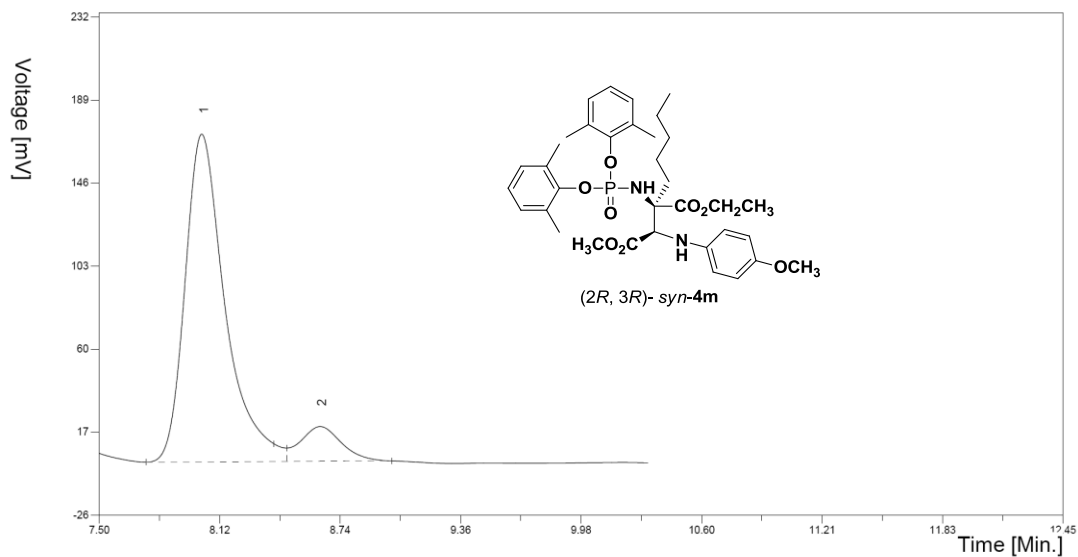

组分表

| #  | 组分名     | 保留时间(min) | 峰高(mv) | 峰面积(mv.sec) | 面积百分比(%) |
|----|---------|-----------|--------|-------------|----------|
| 1  | Unknown | 8.03      | 169.68 | 2421.84     | 89.1115  |
| 2  | Unknown | 8.64      | 17.99  | 295.92      | 10.8885  |
| 合计 |         |           | 187.67 | 2717.76     | 100      |

Chiralpak Column:IA  
 M.P: *n*-Hex/*i*-PrOH=6:1  
 UV: 254nm  
 1.0 ml/min  
 Injection Volume: 20µl

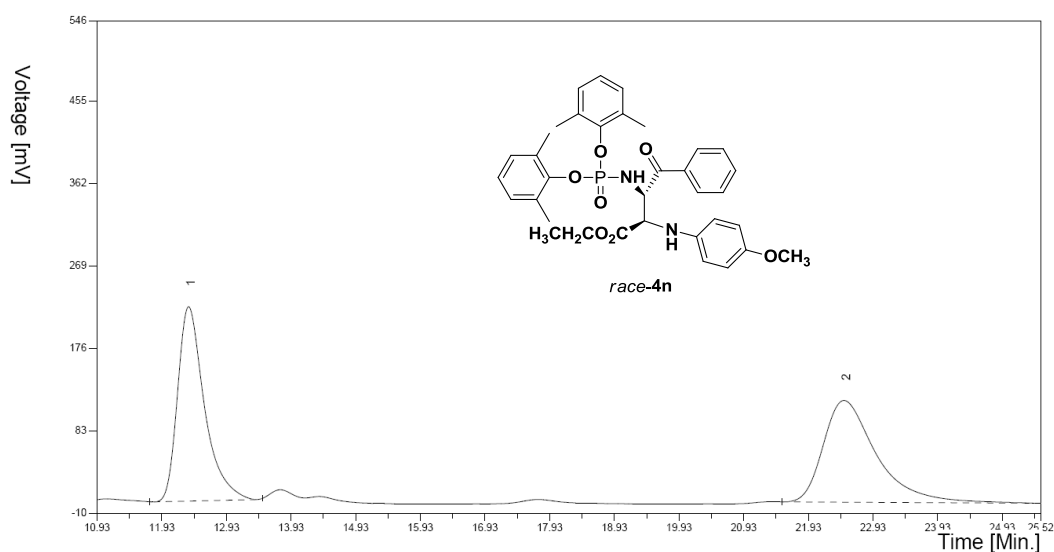

组分表

| #  | 组分名     | 保留时间(min) | 峰高(mv) | 峰面积(mv.sec) | 面积百分比(%) |
|----|---------|-----------|--------|-------------|----------|
| 1  | Unknown | 12.35     | 218.66 | 6250.77     | 48.9002  |
| 2  | Unknown | 22.48     | 114.73 | 6531.94     | 51.0998  |
| 合计 |         |           | 333.40 | 12782.70    | 100      |

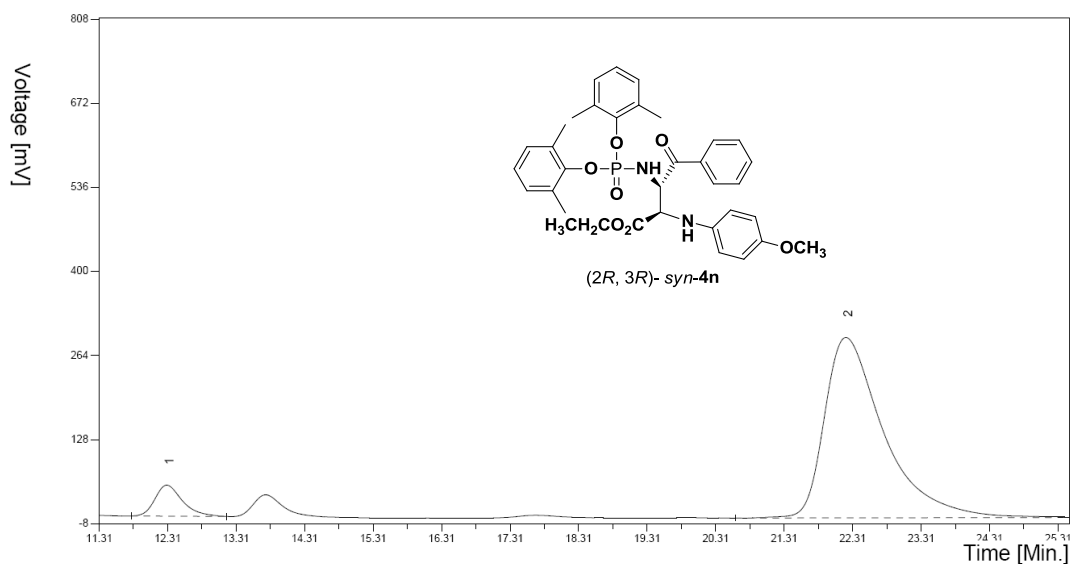

组分表

| #  | 组分名     | 保留时间(min) | 峰高(mv) | 峰面积(mv.sec) | 面积百分比(%) |
|----|---------|-----------|--------|-------------|----------|
| 1  | Unknown | 12.30     | 50.06  | 1394.68     | 7.3507   |
| 2  | Unknown | 22.21     | 291.66 | 17578.78    | 92.6493  |
| 合计 |         |           | 341.73 | 18973.46    | 100      |
